# Supplementary material for: Controlling bias and inflation in epigenome- and transcriptome-wide association studies using the empirical null distribution
Source: Genome Biol. 2017 Jan 27;18:19. doi: 10.1186/s13059-016-1131-9 (PMC5273857; doi:10.1186/s13059-016-1131-9)
Supplement: Additional file 5 — Additional Excel Table S3b. Additional Excel Table S3b with output of significant results of the EWAS meta-analyses of smoking: effect sizes, standard error, P values, test statistics of all cohorts, and the meta-analysis results. (133 KB XLSX) [file 13059_2016_1131_MOESM5_ESM.xlsx]

## Sheet: STable3b_sign_ewas_smoking
eff.size.meta	std.err.meta	pval.adj.meta	pval.org.meta	tstat.meta	eff.size.CODAM	std.err.CODAM	pval.CODAM	tstat.CODAM	eff.size.LL	std.err.LL	pval.LL	tstat.LL	eff.size.LLS	std.err.LLS	pval.LLS	tstat.LLS	eff.size.RS	std.err.RS	pval.RS	tstat.RS
-0.779	0.0235	4.39e-235	9.69e-241	-33.1	-0.621	0.0872	1.06e-12	-7.12	-0.755	0.0361	3e-97	-20.9	-0.803	0.0458	6.35e-69	-17.5	-0.843	0.0481	9.47e-69	-17.5
-0.435	0.0146	1.19e-188	2.62e-194	-29.7	-0.363	0.0516	1.94e-12	-7.04	-0.426	0.0242	1.8e-69	-17.6	-0.437	0.0279	2.52e-55	-15.7	-0.466	0.0278	2.49e-63	-16.8
-0.264	0.00984	2.22e-153	4.89e-159	-26.9	-0.221	0.0347	2.01e-10	-6.36	-0.262	0.0154	1.13e-64	-17	-0.283	0.0191	8.97e-50	-14.8	-0.262	0.0198	4.07e-40	-13.3
-0.309	0.0117	1.28e-148	2.83e-154	-26.5	-0.235	0.041	1.02e-08	-5.73	-0.319	0.0187	1.33e-65	-17.1	-0.33	0.0223	1.27e-49	-14.8	-0.293	0.0232	9.74e-37	-12.7
-0.302	0.0121	1.32e-132	2.92e-138	-25	-0.276	0.0516	9.39e-08	-5.34	-0.268	0.0182	7.17e-49	-14.7	-0.323	0.0233	1.04e-43	-13.9	-0.348	0.0247	5.61e-45	-14.1
-0.358	0.0157	4.35e-109	9.61e-115	-22.8	-0.263	0.0576	5.15e-06	-4.56	-0.376	0.0277	5.71e-42	-13.6	-0.307	0.0298	7.31e-25	-10.3	-0.405	0.0275	5.96e-49	-14.7
-0.207	0.00962	2.46e-97	5.42e-103	-21.5	-0.179	0.035	3.38e-07	-5.1	-0.199	0.0168	1.79e-32	-11.9	-0.22	0.0173	6.61e-37	-12.7	-0.211	0.018	7.36e-32	-11.7
-0.155	0.00829	6.61e-72	1.46e-77	-18.6	-0.116	0.0286	5.05e-05	-4.05	-0.16	0.0132	9.81e-34	-12.1	-0.162	0.0153	3.71e-26	-10.6	-0.149	0.0172	4.74e-18	-8.66
-0.212	0.0116	9.45e-69	2.09e-74	-18.2	-0.188	0.0472	6.86e-05	-3.98	-0.201	0.0196	1.01e-24	-10.3	-0.192	0.0209	3.93e-20	-9.19	-0.253	0.022	1.3e-30	-11.5
-0.495	0.0275	8.86e-67	1.96e-72	-18	-0.269	0.0847	0.0015	-3.18	-0.579	0.0472	1.47e-34	-12.3	-0.537	0.0516	2.56e-25	-10.4	-0.436	0.053	1.97e-16	-8.22
-0.201	0.0117	2.67e-60	5.9e-66	-17.2	-0.219	0.0389	1.77e-08	-5.63	-0.229	0.0214	1.11e-26	-10.7	-0.211	0.0225	5.29e-21	-9.4	-0.163	0.0201	5.73e-16	-8.09
-0.172	0.0103	1.59e-57	3.52e-63	-16.8	-0.136	0.04	0.000659	-3.41	-0.193	0.0173	4.15e-29	-11.2	-0.133	0.0192	4.46e-12	-6.92	-0.193	0.0189	1.65e-24	-10.2
-0.161	0.00968	1.63e-56	3.59e-62	-16.6	-0.339	0.0501	1.22e-11	-6.78	-0.0809	0.0134	1.7e-09	-6.02	-0.202	0.0191	3.78e-26	-10.6	-0.294	0.0225	6.54e-39	-13
-0.155	0.00935	4.32e-56	9.55e-62	-16.6	-0.122	0.0326	0.000173	-3.76	-0.172	0.0161	1.36e-26	-10.7	-0.166	0.018	3.53e-20	-9.2	-0.136	0.0167	4.54e-16	-8.12
-0.284	0.0176	3.23e-53	7.13e-59	-16.2	-0.241	0.0681	0.000401	-3.54	-0.262	0.0269	1.88e-22	-9.75	-0.301	0.0334	2.09e-19	-9.01	-0.318	0.0366	4.21e-18	-8.67
-0.125	0.00777	4.07e-52	9e-58	-16	-0.14	0.0299	2.9e-06	-4.68	-0.111	0.0122	9.5e-20	-9.09	-0.116	0.0146	2.84e-15	-7.9	-0.153	0.0157	1.95e-22	-9.74
-0.114	0.00718	2.07e-51	4.58e-57	-15.9	-0.0727	0.0284	0.0104	-2.56	-0.135	0.012	1.79e-29	-11.3	-0.108	0.0136	2.39e-15	-7.92	-0.104	0.0132	2.11e-15	-7.93
-0.171	0.0108	1.5e-50	3.32e-56	-15.8	-0.117	0.037	0.00161	-3.15	-0.179	0.018	2.79e-23	-9.94	-0.185	0.0199	1.09e-20	-9.33	-0.161	0.0213	4.69e-14	-7.54
-0.167	0.0109	4.46e-47	9.86e-53	-15.3	-0.148	0.0331	8.3e-06	-4.46	-0.178	0.0198	1.78e-19	-9.03	-0.17	0.0195	3.07e-18	-8.71	-0.158	0.0209	3.8e-14	-7.57
-0.165	0.011	7.72e-45	1.71e-50	-14.9	-0.178	0.0487	0.000252	-3.66	-0.177	0.0192	2.43e-20	-9.24	-0.135	0.0202	2.37e-11	-6.68	-0.177	0.0195	8.06e-20	-9.11
-0.311	0.0211	2.51e-43	5.55e-49	-14.7	-0.251	0.0902	0.00548	-2.78	-0.323	0.0355	9.43e-20	-9.1	-0.307	0.0378	4.43e-16	-8.13	-0.311	0.04	7.4e-15	-7.78
-0.202	0.014	8.64e-42	1.91e-47	-14.5	-0.335	0.058	8.04e-09	-5.77	-0.191	0.022	3.83e-18	-8.68	-0.16	0.0256	4e-10	-6.25	-0.242	0.0286	2.52e-17	-8.47
-0.0937	0.00662	7.81e-40	1.73e-45	-14.2	-0.116	0.0277	3.05e-05	-4.17	-0.0775	0.0101	1.36e-14	-7.7	-0.0846	0.0128	3.45e-11	-6.63	-0.128	0.0135	2.58e-21	-9.48
-0.134	0.00946	9.17e-40	2.03e-45	-14.1	-0.161	0.0366	1.03e-05	-4.41	-0.147	0.0156	5.04e-21	-9.41	-0.114	0.0175	7.11e-11	-6.52	-0.131	0.0181	5.02e-13	-7.22
-0.471	0.0333	1.39e-39	3.07e-45	-14.1	-0.554	0.145	0.000136	-3.82	-0.439	0.0533	1.57e-16	-8.25	-0.445	0.063	1.66e-12	-7.06	-0.525	0.0635	1.39e-16	-8.27
-0.277	0.0201	1.42e-37	3.13e-43	-13.8	-0.254	0.0918	0.0056	-2.77	-0.288	0.0333	6.33e-18	-8.63	-0.249	0.036	4.46e-12	-6.92	-0.3	0.0383	5.27e-15	-7.82
-0.194	0.0141	2.16e-37	4.78e-43	-13.8	-0.204	0.0519	8.32e-05	-3.93	-0.22	0.023	1.14e-21	-9.56	-0.19	0.026	2.46e-13	-7.32	-0.158	0.0281	1.93e-08	-5.62
-0.0849	0.00624	1.85e-36	4.08e-42	-13.6	-0.0411	0.0249	0.099	-1.65	-0.0887	0.00982	1.59e-19	-9.04	-0.0789	0.0121	7.05e-11	-6.52	-0.0953	0.0121	3.04e-15	-7.89
-0.1	0.00747	3.13e-35	6.91e-41	-13.4	-0.103	0.0288	0.000333	-3.59	-0.104	0.0125	1.25e-16	-8.28	-0.0963	0.013	1.11e-13	-7.43	-0.0989	0.0151	5.76e-11	-6.55
-0.122	0.00915	5.95e-35	1.31e-40	-13.3	-0.0476	0.0279	0.0884	-1.7	-0.199	0.0201	3.67e-23	-9.91	-0.108	0.016	1.59e-11	-6.74	-0.113	0.0153	1.68e-13	-7.37
-0.084	0.00633	1.79e-34	3.96e-40	-13.3	-0.0607	0.0232	0.00874	-2.62	-0.091	0.011	1.02e-16	-8.3	-0.0814	0.0114	1.13e-12	-7.11	-0.0845	0.0119	9.75e-13	-7.13
-0.187	0.0141	3.26e-34	7.21e-40	-13.2	-0.176	0.0589	0.00276	-2.99	-0.186	0.0222	4.57e-17	-8.4	-0.188	0.0264	8.98e-13	-7.15	-0.189	0.0284	3.05e-11	-6.64
-0.186	0.0143	2.53e-33	5.59e-39	-13.1	-0.148	0.0538	0.00587	-2.76	-0.207	0.0222	1.17e-20	-9.32	-0.17	0.0271	3.7e-10	-6.27	-0.18	0.029	5.07e-10	-6.22
-0.119	0.00914	6.66e-33	1.47e-38	-13	-0.101	0.0355	0.00435	-2.85	-0.119	0.0141	3.52e-17	-8.43	-0.119	0.0171	4.57e-12	-6.92	-0.124	0.0191	9.56e-11	-6.47
-0.169	0.0135	2.93e-30	6.48e-36	-12.5	-0.126	0.0486	0.00921	-2.6	-0.199	0.0225	8.36e-19	-8.86	-0.145	0.0258	2.07e-08	-5.61	-0.166	0.0252	4.61e-11	-6.58
-0.227	0.0183	1.6e-29	3.53e-35	-12.4	-0.256	0.0577	9.63e-06	-4.43	-0.232	0.0306	3.55e-14	-7.58	-0.242	0.0357	1.1e-11	-6.79	-0.195	0.0348	2.16e-08	-5.6
0.231	0.0192	7.23e-28	1.6e-33	12.1	0.241	0.0812	0.00303	2.97	0.193	0.0276	2.4e-12	7.01	0.278	0.0383	3.79e-13	7.26	0.259	0.0417	4.76e-10	6.23
-0.126	0.0105	7.52e-28	1.66e-33	-12.1	-0.144	0.0401	0.000314	-3.6	-0.111	0.0172	1.3e-10	-6.43	-0.123	0.0192	1.46e-10	-6.41	-0.147	0.0204	4.93e-13	-7.23
-0.173	0.0144	1.08e-27	2.38e-33	-12	-0.217	0.0675	0.00129	-3.22	-0.16	0.0232	4.71e-12	-6.91	-0.161	0.0253	2.05e-10	-6.36	-0.201	0.029	4.02e-12	-6.94
-0.135	0.0113	6.27e-27	1.39e-32	-11.9	-0.0976	0.0328	0.00292	-2.98	-0.157	0.0214	2.02e-13	-7.35	-0.14	0.02	2.27e-12	-7.02	-0.122	0.0216	1.53e-08	-5.66
-0.0537	0.0046	8.25e-26	1.82e-31	-11.7	-0.06	0.0174	0.000558	-3.45	-0.0549	0.00696	3.09e-15	-7.89	-0.0533	0.0088	1.39e-09	-6.06	-0.0498	0.00983	3.99e-07	-5.07
-0.137	0.0119	2.71e-25	5.99e-31	-11.6	-0.152	0.0516	0.00321	-2.95	-0.0988	0.0194	3.4e-07	-5.1	-0.158	0.0218	3.5e-13	-7.27	-0.164	0.0227	4.04e-13	-7.25
-0.219	0.019	3.88e-25	8.57e-31	-11.5	-0.317	0.0694	5.01e-06	-4.56	-0.158	0.0289	4.79e-08	-5.46	-0.229	0.035	5.52e-11	-6.56	-0.295	0.042	2.18e-12	-7.02
-0.124	0.0107	6.2e-25	1.37e-30	-11.5	-0.0969	0.0424	0.0224	-2.28	-0.11	0.0166	3.05e-11	-6.64	-0.127	0.0193	4.75e-11	-6.58	-0.154	0.0237	8.21e-11	-6.5
-0.222	0.0195	3.45e-24	7.62e-30	-11.3	-0.134	0.0697	0.0547	-1.92	-0.248	0.0319	7.12e-15	-7.78	-0.261	0.0378	5.12e-12	-6.9	-0.173	0.0369	2.75e-06	-4.69
-0.0704	0.0063	2.29e-23	5.05e-29	-11.2	-0.0425	0.0221	0.054	-1.93	-0.0645	0.0109	3.13e-09	-5.92	-0.0711	0.0117	1.05e-09	-6.1	-0.0842	0.0116	4.86e-13	-7.23
-0.171	0.0153	2.6e-23	5.75e-29	-11.2	-0.173	0.0494	0.000478	-3.49	-0.14	0.0232	1.7e-09	-6.02	-0.178	0.0301	3.49e-09	-5.91	-0.231	0.0339	9.84e-12	-6.81
-0.142	0.0128	3.39e-23	7.49e-29	-11.1	-0.145	0.046	0.0016	-3.16	-0.124	0.0196	2.12e-10	-6.35	-0.159	0.0238	2.27e-11	-6.69	-0.154	0.0278	2.95e-08	-5.54
-0.157	0.0143	3.38e-22	7.47e-28	-10.9	-0.135	0.0482	0.00505	-2.8	-0.176	0.0254	4.88e-12	-6.91	-0.181	0.0259	2.9e-12	-6.98	-0.117	0.0266	1.17e-05	-4.38
-0.12	0.0111	9.99e-22	2.21e-27	-10.8	-0.0422	0.0366	0.249	-1.15	-0.131	0.0177	1.36e-13	-7.4	-0.125	0.0214	4.69e-09	-5.86	-0.127	0.0224	1.41e-08	-5.67
-0.243	0.0224	1.03e-21	2.27e-27	-10.8	-0.21	0.0881	0.017	-2.39	-0.245	0.0376	7.18e-11	-6.52	-0.269	0.0402	2.17e-11	-6.69	-0.218	0.0433	4.68e-07	-5.04
-0.074	0.00686	1.64e-21	3.62e-27	-10.8	-0.053	0.0244	0.0296	-2.18	-0.0849	0.012	1.26e-12	-7.1	-0.0694	0.0121	1.08e-08	-5.72	-0.0723	0.0131	3.38e-08	-5.52
-0.101	0.00945	2.98e-21	6.59e-27	-10.7	-0.0398	0.0386	0.302	-1.03	-0.111	0.0147	5.57e-14	-7.52	-0.0796	0.0188	2.2e-05	-4.24	-0.122	0.0181	1.69e-11	-6.73
0.326	0.0303	2.99e-21	6.6e-27	10.7	0.209	0.104	0.0435	2.02	0.355	0.051	3.3e-12	6.96	0.337	0.0581	6.46e-09	5.8	0.314	0.0565	2.9e-08	5.55
-0.121	0.0114	1.01e-20	2.23e-26	-10.6	-0.23	0.0536	1.81e-05	-4.29	-0.089	0.0189	2.6e-06	-4.7	-0.0981	0.0192	3.25e-07	-5.11	-0.185	0.0235	2.95e-15	-7.89
-0.0854	0.00805	1.14e-20	2.52e-26	-10.6	-0.0783	0.0335	0.0193	-2.34	-0.093	0.013	8.52e-13	-7.15	-0.0867	0.0147	4.2e-09	-5.88	-0.0746	0.0158	2.22e-06	-4.73
-0.0707	0.00667	1.34e-20	2.95e-26	-10.6	-0.0391	0.025	0.118	-1.56	-0.0732	0.0106	5.43e-12	-6.89	-0.0842	0.0125	1.78e-11	-6.72	-0.0605	0.0133	5.67e-06	-4.54
0.429	0.0407	2.11e-20	4.67e-26	10.6	0.218	0.14	0.12	1.55	0.498	0.0655	3.01e-14	7.6	0.423	0.0779	5.86e-08	5.42	0.402	0.0798	4.64e-07	5.04
-0.0775	0.00737	3.46e-20	7.65e-26	-10.5	-0.0654	0.0253	0.00964	-2.59	-0.0775	0.0118	4.64e-11	-6.58	-0.0849	0.0134	2.53e-10	-6.32	-0.0719	0.0156	4.31e-06	-4.6
-0.0634	0.00605	4.74e-20	1.05e-25	-10.5	-0.0447	0.0263	0.0899	-1.7	-0.0495	0.00981	4.64e-07	-5.04	-0.0727	0.0113	1.2e-10	-6.44	-0.0764	0.0114	2.4e-11	-6.68
-0.0691	0.00665	1.2e-19	2.65e-25	-10.4	-0.0768	0.0278	0.00574	-2.76	-0.0775	0.0101	1.95e-14	-7.65	-0.0561	0.0122	4.54e-06	-4.59	-0.0679	0.0143	1.9e-06	-4.76
-0.0711	0.00692	4.16e-19	9.2e-25	-10.3	-0.0602	0.0261	0.0212	-2.3	-0.0684	0.0114	2.19e-09	-5.98	-0.0521	0.0134	0.0001	-3.89	-0.0942	0.0127	1.28e-13	-7.41
-0.126	0.0123	5.9e-19	1.3e-24	-10.2	-0.141	0.0436	0.00127	-3.22	-0.125	0.0203	6.01e-10	-6.19	-0.127	0.0227	2.33e-08	-5.59	-0.121	0.0241	5.36e-07	-5.01
-0.121	0.0119	9.62e-19	2.12e-24	-10.2	-0.192	0.0511	0.000171	-3.76	-0.0846	0.0184	4.33e-06	-4.59	-0.119	0.0231	2.52e-07	-5.16	-0.165	0.0229	6.95e-13	-7.18
-0.196	0.0193	1.42e-18	3.14e-24	-10.2	-0.383	0.0777	8.15e-07	-4.93	-0.185	0.0293	3.02e-10	-6.3	-0.173	0.035	7.43e-07	-4.95	-0.197	0.0429	4.52e-06	-4.59
-0.163	0.0163	4.91e-18	1.09e-23	-10	-0.178	0.0563	0.00156	-3.16	-0.151	0.0276	4.8e-08	-5.46	-0.185	0.0301	7.84e-10	-6.15	-0.152	0.031	9.54e-07	-4.9
-0.224	0.0226	1.3e-17	2.88e-23	-9.94	-0.276	0.0743	0.000198	-3.72	-0.164	0.0395	3.12e-05	-4.16	-0.225	0.0435	2.37e-07	-5.17	-0.271	0.0404	1.99e-11	-6.71
-0.147	0.0148	1.63e-17	3.6e-23	-9.91	-0.123	0.0512	0.0166	-2.4	-0.156	0.0245	1.86e-10	-6.37	-0.145	0.0274	1.13e-07	-5.3	-0.143	0.0291	8.68e-07	-4.92
-0.0992	0.0101	2.75e-17	6.09e-23	-9.86	-0.106	0.0361	0.00346	-2.92	-0.114	0.0167	8.07e-12	-6.84	-0.076	0.0196	0.000101	-3.89	-0.0999	0.0185	7.01e-08	-5.39
-0.0664	0.00675	3.18e-17	7.02e-23	-9.85	-0.0361	0.0237	0.127	-1.52	-0.0588	0.0107	3.53e-08	-5.51	-0.0702	0.0126	2.33e-08	-5.59	-0.0855	0.014	1.09e-09	-6.1
-0.0659	0.00669	3.22e-17	7.12e-23	-9.85	-0.0857	0.0279	0.00212	-3.07	-0.0575	0.0103	2.54e-08	-5.57	-0.0614	0.0124	6.8e-07	-4.97	-0.0823	0.014	4.31e-09	-5.87
-0.0797	0.0081	3.45e-17	7.63e-23	-9.84	-0.0803	0.0268	0.0027	-3	-0.0725	0.0144	5.2e-07	-5.02	-0.103	0.0148	3.37e-12	-6.96	-0.0636	0.015	2.14e-05	-4.25
-0.424	0.0431	3.71e-17	8.2e-23	-9.83	-0.416	0.157	0.00798	-2.65	-0.444	0.0747	2.83e-09	-5.94	-0.449	0.0765	4.38e-09	-5.87	-0.373	0.0826	6.15e-06	-4.52
-0.0982	0.00999	3.91e-17	8.63e-23	-9.83	-0.0732	0.0322	0.0232	-2.27	-0.0967	0.0175	3.15e-08	-5.53	-0.122	0.0188	8.81e-11	-6.49	-0.0851	0.0184	3.59e-06	-4.63
-0.132	0.0135	3.99e-17	8.83e-23	-9.82	-0.203	0.0462	1.12e-05	-4.39	-0.149	0.0241	6.11e-10	-6.19	-0.0809	0.0234	0.000544	-3.46	-0.153	0.0258	2.82e-09	-5.94
-0.0726	0.00741	5.28e-17	1.17e-22	-9.8	-0.0238	0.032	0.457	-0.743	-0.0657	0.012	4.51e-08	-5.47	-0.0734	0.0134	4.32e-08	-5.48	-0.0916	0.0145	2.7e-10	-6.32
-0.0919	0.00941	7.18e-17	1.59e-22	-9.77	-0.119	0.0388	0.00223	-3.06	-0.108	0.0164	3.8e-11	-6.61	-0.0716	0.0154	3.5e-06	-4.64	-0.0943	0.0192	9.56e-07	-4.9
-0.0483	0.00497	1.09e-16	2.4e-22	-9.72	-0.0537	0.0192	0.00522	-2.79	-0.0518	0.00822	2.89e-10	-6.3	-0.0406	0.00897	5.86e-06	-4.53	-0.0509	0.0097	1.55e-07	-5.25
-0.104	0.0107	1.41e-16	3.12e-22	-9.7	-0.0732	0.0402	0.0686	-1.82	-0.131	0.0175	6.88e-14	-7.49	-0.099	0.0197	4.94e-07	-5.03	-0.079	0.0213	0.000209	-3.71
-0.0937	0.00972	2.24e-16	4.96e-22	-9.65	-0.233	0.0428	4.83e-08	-5.46	-0.0284	0.0136	0.0366	-2.09	-0.0825	0.0201	3.96e-05	-4.11	-0.234	0.0215	1.3e-27	-10.9
-0.289	0.0303	4.88e-16	1.08e-21	-9.57	-0.252	0.103	0.0146	-2.44	-0.317	0.0524	1.44e-09	-6.05	-0.306	0.0554	3.45e-08	-5.52	-0.251	0.0569	1e-05	-4.42
0.147	0.0155	9.44e-16	2.09e-21	9.5	0.103	0.0516	0.0455	2	0.167	0.0253	4.33e-11	6.59	0.154	0.0276	2.34e-08	5.58	0.121	0.0326	0.000216	3.7
-0.165	0.0176	2.66e-15	5.88e-21	-9.39	-0.184	0.0719	0.0106	-2.56	-0.153	0.0274	2.18e-08	-5.6	-0.162	0.0318	3.34e-07	-5.1	-0.186	0.0374	6.05e-07	-4.99
-0.114	0.0121	3.72e-15	8.22e-21	-9.36	-0.146	0.0382	0.000131	-3.82	-0.0824	0.0204	5.24e-05	-4.04	-0.123	0.0216	1.2e-08	-5.7	-0.135	0.0254	1.2e-07	-5.29
-0.13	0.0139	4.03e-15	8.9e-21	-9.35	-0.151	0.0538	0.00494	-2.81	-0.101	0.0216	2.84e-06	-4.68	-0.14	0.0284	8.19e-07	-4.93	-0.158	0.0261	1.58e-09	-6.04
-0.0561	0.00604	6.67e-15	1.47e-20	-9.29	-0.0361	0.0247	0.144	-1.46	-0.0786	0.011	7.76e-13	-7.17	-0.0484	0.0103	2.56e-06	-4.7	-0.046	0.0111	3.66e-05	-4.13
-0.0725	0.00784	1.02e-14	2.25e-20	-9.25	-0.161	0.0374	1.66e-05	-4.31	-0.0651	0.013	5.31e-07	-5.01	-0.0659	0.0135	9.61e-07	-4.9	-0.0767	0.0156	9.13e-07	-4.91
-0.107	0.0117	3.02e-14	6.68e-20	-9.13	-0.135	0.0407	0.00091	-3.32	-0.0898	0.0244	0.000235	-3.68	-0.0838	0.0208	5.54e-05	-4.03	-0.132	0.0193	9.25e-12	-6.82
-0.0943	0.0103	3.05e-14	6.73e-20	-9.13	-0.2	0.0408	9.84e-07	-4.89	-0.0452	0.016	0.00482	-2.82	-0.0817	0.0191	1.97e-05	-4.27	-0.17	0.0215	3.45e-15	-7.87
-0.125	0.0138	3.45e-14	7.61e-20	-9.12	-0.179	0.0519	0.000588	-3.44	-0.113	0.0223	4.53e-07	-5.05	-0.131	0.0253	2.07e-07	-5.19	-0.124	0.0274	6.47e-06	-4.51
-0.101	0.0111	4.08e-14	9.01e-20	-9.1	-0.122	0.0396	0.00216	-3.07	-0.0956	0.0174	3.97e-08	-5.49	-0.109	0.0217	5.27e-07	-5.02	-0.0959	0.0222	1.58e-05	-4.32
-0.0759	0.00836	4.75e-14	1.05e-19	-9.08	-0.0788	0.0338	0.0198	-2.33	-0.0748	0.0129	7.33e-09	-5.78	-0.0715	0.0153	3.03e-06	-4.67	-0.0833	0.0177	2.57e-06	-4.7
-0.0768	0.00848	6.12e-14	1.35e-19	-9.06	-0.0813	0.0345	0.0183	-2.36	-0.0567	0.0138	4.22e-05	-4.09	-0.0835	0.0152	3.95e-08	-5.49	-0.0972	0.0168	7.93e-09	-5.77
-0.118	0.0131	9.25e-14	2.04e-19	-9.01	-0.0764	0.0414	0.0652	-1.84	-0.132	0.0212	4.58e-10	-6.23	-0.115	0.0259	8.86e-06	-4.44	-0.117	0.0258	5.46e-06	-4.55
-0.144	0.016	1.23e-13	2.71e-19	-8.98	-0.231	0.0595	0.000103	-3.88	-0.103	0.0251	3.85e-05	-4.12	-0.142	0.0313	6.04e-06	-4.53	-0.184	0.0313	4.22e-09	-5.88
-0.0582	0.0065	1.53e-13	3.39e-19	-8.96	-0.0184	0.0219	0.402	-0.838	-0.0781	0.0111	1.67e-12	-7.06	-0.0543	0.012	6.37e-06	-4.51	-0.0501	0.0124	5.19e-05	-4.05
-0.122	0.0136	2e-13	4.41e-19	-8.93	-0.119	0.0526	0.0236	-2.26	-0.126	0.0221	1.26e-08	-5.69	-0.0891	0.0254	0.000451	-3.51	-0.152	0.0265	1.01e-08	-5.73
-0.0503	0.00564	2.22e-13	4.91e-19	-8.91	-0.0197	0.0211	0.352	-0.93	-0.0488	0.00966	4.34e-07	-5.05	-0.0454	0.0102	8.71e-06	-4.45	-0.0649	0.0106	8.91e-10	-6.13
-0.0884	0.00992	2.43e-13	5.36e-19	-8.9	-0.13	0.0375	0.000505	-3.48	-0.111	0.0167	3.05e-11	-6.64	-0.0603	0.0174	0.000527	-3.47	-0.0811	0.0197	3.97e-05	-4.11
0.106	0.012	2.7e-13	5.96e-19	8.89	0.0928	0.0406	0.0223	2.29	0.0987	0.0197	5.63e-07	5	0.135	0.0219	7.47e-10	6.16	0.088	0.024	0.000241	3.67
0.0838	0.00942	2.78e-13	6.14e-19	8.89	0.141	0.0383	0.000232	3.68	0.0901	0.0153	4.26e-09	5.87	0.0653	0.0162	5.62e-05	4.03	0.0855	0.0199	1.73e-05	4.3
0.107	0.0121	3.35e-13	7.39e-19	8.87	0.101	0.0464	0.0301	2.17	0.0925	0.0199	3.26e-06	4.65	0.106	0.0227	3.24e-06	4.65	0.129	0.0227	1.46e-08	5.67
-0.178	0.0201	3.83e-13	8.46e-19	-8.85	-0.176	0.0723	0.015	-2.43	-0.167	0.0309	6.37e-08	-5.41	-0.187	0.0381	9.8e-07	-4.9	-0.191	0.0432	9.96e-06	-4.42
-0.0582	0.00659	4.9e-13	1.08e-18	-8.83	-0.0642	0.0254	0.0115	-2.53	-0.0617	0.0105	3.84e-09	-5.89	-0.0473	0.0117	4.91e-05	-4.06	-0.0659	0.0142	3.26e-06	-4.65
-0.132	0.0149	5.09e-13	1.12e-18	-8.82	-0.12	0.048	0.0122	-2.51	-0.0902	0.023	8.91e-05	-3.92	-0.146	0.028	2.02e-07	-5.2	-0.203	0.0333	9.85e-10	-6.11
-0.186	0.0214	1.65e-12	3.64e-18	-8.69	-0.152	0.0821	0.065	-1.85	-0.162	0.033	9.33e-07	-4.91	-0.208	0.041	3.96e-07	-5.07	-0.214	0.0439	1.12e-06	-4.87
-0.0724	0.00834	1.67e-12	3.69e-18	-8.69	-0.138	0.0283	1.07e-06	-4.88	-0.0772	0.0152	3.64e-07	-5.09	-0.0595	0.0138	1.69e-05	-4.3	-0.0626	0.0167	0.000183	-3.74
-0.0781	0.00903	2.43e-12	5.37e-18	-8.65	-0.118	0.0368	0.00133	-3.21	-0.0934	0.0144	7.49e-11	-6.51	-0.0539	0.0167	0.00123	-3.23	-0.0724	0.018	5.86e-05	-4.02
0.0677	0.00787	3.72e-12	8.22e-18	8.6	0.0296	0.0286	0.299	1.04	0.0913	0.0145	2.83e-10	6.31	0.0762	0.0141	6.59e-08	5.4	0.0463	0.014	0.000916	3.32
-0.172	0.0202	8.04e-12	1.78e-17	-8.51	-0.184	0.0595	0.00195	-3.1	-0.167	0.0359	3.1e-06	-4.66	-0.208	0.0375	3e-08	-5.54	-0.134	0.0382	0.000455	-3.51
-0.113	0.0133	8.51e-12	1.88e-17	-8.5	-0.18	0.0512	0.000428	-3.52	-0.157	0.0229	6.87e-12	-6.86	-0.0558	0.0239	0.0197	-2.33	-0.107	0.0249	1.66e-05	-4.31
0.101	0.0119	8.84e-12	1.95e-17	8.5	0.142	0.0381	0.000195	3.73	0.141	0.0241	4.64e-09	5.86	0.0762	0.0218	0.000466	3.5	0.0842	0.02	2.64e-05	4.2
0.202	0.0239	1.09e-11	2.41e-17	8.47	0.155	0.098	0.113	1.58	0.208	0.0406	3.12e-07	5.12	0.18	0.043	2.95e-05	4.18	0.229	0.0445	2.59e-07	5.15
-0.068	0.00807	1.54e-11	3.4e-17	-8.43	-0.023	0.0289	0.425	-0.797	-0.0555	0.0129	1.63e-05	-4.31	-0.0812	0.0146	2.47e-08	-5.58	-0.0877	0.0171	2.89e-07	-5.13
0.107	0.0127	1.84e-11	4.07e-17	8.41	0.22	0.048	4.6e-06	4.58	0.114	0.0223	3.58e-07	5.09	0.0833	0.0223	0.000192	3.73	0.0988	0.0241	4.13e-05	4.1
-0.0744	0.00886	2e-11	4.43e-17	-8.4	-0.113	0.033	0.000631	-3.42	-0.0525	0.0135	0.000105	-3.88	-0.0749	0.0177	2.29e-05	-4.23	-0.101	0.0178	1.48e-08	-5.66
0.0582	0.00695	2.4e-11	5.3e-17	8.38	0.0669	0.0255	0.00873	2.62	0.0376	0.014	0.00713	2.69	0.0668	0.0121	3.31e-08	5.52	0.0629	0.0118	9.11e-08	5.34
0.0828	0.00998	4.84e-11	1.07e-16	8.3	0.159	0.0349	5.12e-06	4.56	0.0887	0.0178	6.65e-07	4.97	0.044	0.018	0.0143	2.45	0.096	0.0183	1.64e-07	5.24
-0.0875	0.0106	5.12e-11	1.13e-16	-8.29	-0.101	0.0334	0.00255	-3.02	-0.0821	0.0175	2.75e-06	-4.69	-0.0799	0.0188	2.13e-05	-4.25	-0.101	0.0225	6.37e-06	-4.51
0.102	0.0124	5.35e-11	1.18e-16	8.28	0.155	0.0365	2.1e-05	4.25	0.121	0.0201	2.05e-09	5.99	0.0745	0.0238	0.0018	3.12	0.0798	0.0253	0.00158	3.16
-0.125	0.0151	6.07e-11	1.34e-16	-8.27	-0.124	0.0539	0.0213	-2.3	-0.123	0.0256	1.47e-06	-4.82	-0.127	0.0283	7.79e-06	-4.47	-0.125	0.0279	8.08e-06	-4.46
-0.135	0.0164	6.87e-11	1.52e-16	-8.26	-0.187	0.0615	0.00239	-3.04	-0.14	0.0282	6.56e-07	-4.97	-0.141	0.029	1.22e-06	-4.85	-0.109	0.0313	0.000498	-3.48
-0.115	0.014	7.29e-11	1.61e-16	-8.25	-0.142	0.0496	0.00416	-2.87	-0.118	0.0241	9.74e-07	-4.9	-0.0856	0.0263	0.00113	-3.26	-0.134	0.0256	1.71e-07	-5.23
-0.0947	0.0115	9.45e-11	2.09e-16	-8.22	-0.168	0.0434	0.000108	-3.87	-0.103	0.0207	7.67e-07	-4.94	-0.0943	0.0203	3.53e-06	-4.64	-0.0698	0.0211	0.000915	-3.32
-0.134	0.0163	1.24e-10	2.73e-16	-8.18	-0.148	0.0433	0.000632	-3.42	-0.161	0.0327	8.83e-07	-4.92	-0.16	0.0316	4.19e-07	-5.06	-0.0873	0.0279	0.00176	-3.13
-0.0742	0.00908	1.38e-10	3.05e-16	-8.17	-0.0259	0.0358	0.468	-0.725	-0.0667	0.0144	3.43e-06	-4.64	-0.0826	0.0156	1.11e-07	-5.31	-0.0909	0.0206	9.77e-06	-4.42
0.103	0.0126	1.4e-10	3.09e-16	8.17	0.217	0.051	2.11e-05	4.25	0.0955	0.0199	1.53e-06	4.81	0.0848	0.0238	0.000359	3.57	0.109	0.0252	1.62e-05	4.31
-0.0825	0.0101	1.81e-10	3.99e-16	-8.14	-0.0535	0.0365	0.143	-1.46	-0.06	0.0164	0.000251	-3.66	-0.098	0.0185	1.2e-07	-5.29	-0.108	0.0207	1.6e-07	-5.24
0.0546	0.00672	2.08e-10	4.6e-16	8.12	0.0975	0.03	0.00113	3.26	0.0521	0.0108	1.52e-06	4.81	0.0519	0.0121	1.96e-05	4.27	0.0533	0.0132	5.78e-05	4.02
-0.123	0.0152	2.29e-10	5.05e-16	-8.11	-0.134	0.0542	0.0133	-2.48	-0.094	0.0263	0.000347	-3.58	-0.128	0.0271	2.38e-06	-4.72	-0.15	0.0289	2.35e-07	-5.17
-0.128	0.0158	2.73e-10	6.04e-16	-8.09	-0.0897	0.0657	0.172	-1.36	-0.111	0.0249	8.48e-06	-4.45	-0.147	0.0288	3.13e-07	-5.12	-0.142	0.0326	1.3e-05	-4.36
-0.074	0.00915	2.91e-10	6.42e-16	-8.08	-0.145	0.0347	3.07e-05	-4.17	-0.0924	0.0149	6.18e-10	-6.19	-0.0469	0.0163	0.00408	-2.87	-0.0601	0.0187	0.00128	-3.22
0.239	0.0296	3.35e-10	7.39e-16	8.06	0.3	0.0988	0.00238	3.04	0.232	0.0452	2.85e-07	5.13	0.223	0.0604	0.000217	3.7	0.245	0.0607	5.53e-05	4.03
0.138	0.0172	3.72e-10	8.22e-16	8.05	0.239	0.0738	0.00119	3.24	0.141	0.0261	6.37e-08	5.41	0.117	0.0316	0.000221	3.69	0.138	0.0371	0.000206	3.71
-0.0439	0.00545	3.94e-10	8.72e-16	-8.04	-0.0829	0.0286	0.00374	-2.9	-0.0535	0.00785	9.83e-12	-6.81	-0.0283	0.0101	0.00494	-2.81	-0.0359	0.0126	0.00426	-2.86
-0.0871	0.0108	4.16e-10	9.2e-16	-8.04	-0.0973	0.0359	0.00676	-2.71	-0.0821	0.018	4.93e-06	-4.57	-0.0858	0.0204	2.55e-05	-4.21	-0.0918	0.0211	1.39e-05	-4.35
-0.138	0.0172	4.64e-10	1.03e-15	-8.02	-0.107	0.0608	0.0781	-1.76	-0.106	0.0291	0.00028	-3.63	-0.142	0.031	4.56e-06	-4.58	-0.186	0.0336	3.22e-08	-5.53
-0.0922	0.0115	4.77e-10	1.05e-15	-8.02	-0.165	0.0472	0.000453	-3.51	-0.0644	0.0187	0.000591	-3.44	-0.0999	0.0199	5.2e-07	-5.02	-0.107	0.0239	7e-06	-4.49
-0.0659	0.00822	4.82e-10	1.07e-15	-8.02	-0.0697	0.0309	0.0242	-2.25	-0.069	0.0136	4.21e-07	-5.06	-0.0584	0.0142	3.89e-05	-4.11	-0.0707	0.0171	3.49e-05	-4.14
-0.0787	0.00982	5.04e-10	1.11e-15	-8.01	-0.0705	0.0284	0.0131	-2.48	-0.0814	0.0192	2.23e-05	-4.24	-0.0803	0.0178	6.51e-06	-4.51	-0.0781	0.0175	8.31e-06	-4.46
0.0544	0.0068	5.5e-10	1.22e-15	8	0.165	0.0316	1.98e-07	5.2	0.0398	0.011	0.000291	3.62	0.0513	0.0121	2.18e-05	4.25	0.0606	0.0135	7.68e-06	4.47
0.1	0.0126	6.97e-10	1.54e-15	7.97	0.18	0.0468	0.000125	3.84	0.112	0.0222	4.33e-07	5.05	0.0884	0.0233	0.000147	3.8	0.0806	0.0222	0.000291	3.62
0.0501	0.00628	7.08e-10	1.56e-15	7.97	0.103	0.0276	0.000182	3.74	0.0618	0.0106	6.59e-09	5.8	0.0357	0.0106	0.000735	3.38	0.0431	0.0127	0.000667	3.4
-0.0728	0.00914	7.56e-10	1.67e-15	-7.96	-0.0579	0.0368	0.115	-1.58	-0.0484	0.0139	0.000488	-3.49	-0.0852	0.0166	2.82e-07	-5.14	-0.112	0.0204	4.71e-08	-5.46
0.087	0.0109	7.85e-10	1.73e-15	7.96	0.141	0.0369	0.000134	3.82	0.0883	0.0192	4.04e-06	4.61	0.0796	0.0193	3.87e-05	4.12	0.0767	0.0212	0.000293	3.62
-0.0844	0.0106	9.38e-10	2.07e-15	-7.94	-0.117	0.0382	0.00228	-3.05	-0.0622	0.0161	0.000109	-3.87	-0.0858	0.0212	5.01e-05	-4.06	-0.114	0.0221	2.33e-07	-5.17
-0.188	0.0237	1.07e-09	2.36e-15	-7.92	-0.256	0.0747	0.000597	-3.43	-0.18	0.0418	1.56e-05	-4.32	-0.217	0.045	1.49e-06	-4.81	-0.146	0.0432	0.000744	-3.37
0.117	0.0148	1.13e-09	2.49e-15	7.91	0.278	0.064	1.44e-05	4.34	0.114	0.022	2.48e-07	5.16	0.0894	0.0279	0.00134	3.21	0.122	0.0325	0.00016	3.77
-0.0607	0.00767	1.15e-09	2.53e-15	-7.91	-0.0826	0.031	0.00768	-2.67	-0.058	0.0125	3.48e-06	-4.64	-0.0609	0.0138	9.66e-06	-4.42	-0.0592	0.0153	0.000111	-3.86
0.0592	0.00749	1.19e-09	2.62e-15	7.91	0.106	0.0329	0.00126	3.22	0.0606	0.0124	1.05e-06	4.88	0.0493	0.0134	0.000231	3.68	0.0598	0.0144	3.15e-05	4.16
0.069	0.00873	1.21e-09	2.68e-15	7.9	0.14	0.0352	6.67e-05	3.99	0.0709	0.0142	6e-07	4.99	0.0407	0.0154	0.00837	2.64	0.0853	0.0178	1.57e-06	4.8
-0.0531	0.00672	1.3e-09	2.88e-15	-7.9	-0.0948	0.0262	0.000292	-3.62	-0.0358	0.0104	0.000567	-3.45	-0.0432	0.0129	0.000789	-3.36	-0.0829	0.0137	1.34e-09	-6.06
-0.102	0.0129	1.62e-09	3.58e-15	-7.87	-0.0675	0.0456	0.139	-1.48	-0.0723	0.0196	0.000227	-3.69	-0.114	0.0251	5.2e-06	-4.56	-0.159	0.0279	1.06e-08	-5.72
-0.229	0.0291	1.83e-09	4.04e-15	-7.85	-0.169	0.101	0.0929	-1.68	-0.235	0.0449	1.67e-07	-5.23	-0.225	0.0547	3.81e-05	-4.12	-0.243	0.063	0.000111	-3.86
0.2	0.0255	2e-09	4.41e-15	7.84	0.264	0.0968	0.0065	2.72	0.273	0.0439	4.92e-10	6.22	0.137	0.0453	0.00248	3.03	0.167	0.0486	0.000587	3.44
0.0575	0.00735	2.3e-09	5.09e-15	7.82	0.12	0.0292	4.23e-05	4.09	0.0577	0.0131	1.03e-05	4.41	0.0396	0.0123	0.00123	3.23	0.0669	0.0144	3.31e-06	4.65
-0.0902	0.0115	2.36e-09	5.21e-15	-7.82	-0.168	0.0483	0.000516	-3.47	-0.0936	0.018	1.99e-07	-5.2	-0.0724	0.0203	0.000362	-3.57	-0.0899	0.0252	0.000357	-3.57
-0.0962	0.0123	2.5e-09	5.53e-15	-7.81	-0.113	0.0415	0.00632	-2.73	-0.0915	0.0225	4.65e-05	-4.07	-0.0834	0.0215	0.000101	-3.89	-0.111	0.0231	1.74e-06	-4.78
0.102	0.013	2.51e-09	5.55e-15	7.81	0.172	0.0481	0.00035	3.58	0.127	0.0227	1.91e-08	5.62	0.0693	0.0244	0.00449	2.84	0.0879	0.0234	0.000168	3.76
-0.0941	0.0121	2.93e-09	6.48e-15	-7.79	-0.0712	0.0456	0.119	-1.56	-0.0959	0.0193	6.59e-07	-4.97	-0.0916	0.0221	3.4e-05	-4.14	-0.101	0.0246	4.25e-05	-4.09
-0.0916	0.0118	2.95e-09	6.51e-15	-7.79	-0.128	0.0436	0.00328	-2.94	-0.0781	0.0193	5.05e-05	-4.05	-0.109	0.0228	1.62e-06	-4.8	-0.0837	0.0219	0.000134	-3.82
-0.0818	0.0105	2.96e-09	6.54e-15	-7.79	-0.0495	0.0363	0.173	-1.36	-0.0856	0.0167	3.01e-07	-5.12	-0.0812	0.0197	3.66e-05	-4.13	-0.0877	0.0216	4.82e-05	-4.06
-0.066	0.00848	3e-09	6.64e-15	-7.79	-0.0349	0.0294	0.235	-1.19	-0.0617	0.0146	2.42e-05	-4.22	-0.0766	0.0149	2.59e-07	-5.15	-0.0685	0.0168	4.46e-05	-4.08
-0.0792	0.0102	3.58e-09	7.92e-15	-7.77	-0.103	0.037	0.00534	-2.79	-0.0638	0.0192	0.000887	-3.32	-0.0621	0.0178	0.000503	-3.48	-0.105	0.0181	7.37e-09	-5.78
-0.141	0.0182	3.62e-09	8.01e-15	-7.77	-0.137	0.0532	0.00984	-2.58	-0.165	0.0344	1.52e-06	-4.81	-0.168	0.0346	1.12e-06	-4.87	-0.0988	0.0316	0.00179	-3.12
-0.094	0.0121	3.68e-09	8.13e-15	-7.77	-0.225	0.042	8.24e-08	-5.36	-0.101	0.0181	2.47e-08	-5.58	-0.0476	0.0243	0.0499	-1.96	-0.0828	0.0257	0.00126	-3.22
0.213	0.0275	3.7e-09	8.18e-15	7.76	0.152	0.0902	0.0911	1.69	0.225	0.0449	5.54e-07	5.01	0.226	0.0531	2.12e-05	4.25	0.205	0.0532	0.000114	3.86
0.0893	0.0115	3.71e-09	8.19e-15	7.76	0.136	0.0392	0.000502	3.48	0.113	0.0192	3.75e-09	5.89	0.0769	0.0215	0.000338	3.58	0.0554	0.0221	0.0123	2.5
0.0987	0.0127	4.05e-09	8.94e-15	7.75	0.0832	0.0532	0.118	1.56	0.115	0.021	4.9e-08	5.45	0.0767	0.023	0.000834	3.34	0.105	0.0245	1.78e-05	4.29
-0.12	0.0155	4.26e-09	9.41e-15	-7.75	-0.0887	0.0545	0.104	-1.63	-0.127	0.0259	8.7e-07	-4.92	-0.106	0.0286	0.000208	-3.71	-0.134	0.0298	6.68e-06	-4.5
0.134	0.0174	4.43e-09	9.78e-15	7.74	0.248	0.078	0.0015	3.18	0.15	0.0269	2.81e-08	5.55	0.118	0.0323	0.000265	3.65	0.106	0.035	0.00256	3.02
0.105	0.0136	5.15e-09	1.14e-14	7.72	0.0281	0.0523	0.592	0.536	0.11	0.0218	5.02e-07	5.03	0.102	0.0255	6.41e-05	4	0.12	0.0265	5.41e-06	4.55
-0.0507	0.00657	5.71e-09	1.26e-14	-7.71	-0.0474	0.0265	0.0735	-1.79	-0.0417	0.0104	6.63e-05	-3.99	-0.0491	0.0123	6.34e-05	-4	-0.0672	0.013	2.36e-07	-5.17
-0.0942	0.0122	5.81e-09	1.28e-14	-7.71	-0.149	0.0496	0.00267	-3	-0.0913	0.0201	5.42e-06	-4.55	-0.0827	0.0223	0.000209	-3.71	-0.0984	0.0235	2.9e-05	-4.18
-0.0739	0.00959	5.97e-09	1.32e-14	-7.7	-0.0168	0.029	0.562	-0.579	-0.0922	0.0183	4.6e-07	-5.04	-0.098	0.0176	2.4e-08	-5.58	-0.055	0.017	0.00123	-3.23
-0.115	0.0149	6.21e-09	1.37e-14	-7.7	-0.0345	0.0644	0.593	-0.535	-0.0784	0.0216	0.00029	-3.62	-0.153	0.0298	3.02e-07	-5.12	-0.169	0.0317	9.04e-08	-5.35
-0.155	0.0202	6.56e-09	1.45e-14	-7.69	-0.109	0.0837	0.192	-1.3	-0.14	0.0309	5.97e-06	-4.53	-0.169	0.0386	1.26e-05	-4.37	-0.177	0.0409	1.4e-05	-4.34
0.0579	0.00752	6.69e-09	1.48e-14	7.69	0.145	0.0322	7e-06	4.49	0.0599	0.0119	4.47e-07	5.05	0.0364	0.0131	0.00538	2.78	0.065	0.0163	6.72e-05	3.99
-0.129	0.0167	6.97e-09	1.54e-14	-7.68	-0.104	0.0591	0.0782	-1.76	-0.122	0.0271	6.53e-06	-4.51	-0.14	0.0307	5.14e-06	-4.56	-0.133	0.0342	9.55e-05	-3.9
0.0564	0.00736	7.68e-09	1.7e-14	7.67	0.0863	0.0377	0.022	2.29	0.0652	0.0114	1.03e-08	5.73	0.0367	0.0129	0.00436	2.85	0.0641	0.0158	4.79e-05	4.07
-0.0842	0.011	7.88e-09	1.74e-14	-7.67	-0.113	0.039	0.00382	-2.89	-0.0926	0.0195	2.03e-06	-4.75	-0.0637	0.02	0.00145	-3.18	-0.0883	0.02	9.88e-06	-4.42
0.109	0.0143	1.08e-08	2.38e-14	7.63	0.167	0.0451	0.000217	3.7	0.16	0.0291	3.64e-08	5.51	0.0594	0.025	0.0177	2.37	0.103	0.0247	3.18e-05	4.16
0.149	0.0196	1.17e-08	2.57e-14	7.62	0.171	0.0827	0.0387	2.07	0.155	0.0321	1.46e-06	4.82	0.126	0.0347	0.000292	3.62	0.165	0.0388	2.01e-05	4.26
0.0737	0.00967	1.17e-08	2.59e-14	7.62	0.178	0.0376	2.25e-06	4.73	0.0656	0.0167	8.43e-05	3.93	0.0494	0.0167	0.00311	2.96	0.0888	0.0189	2.57e-06	4.7
-0.0741	0.00973	1.19e-08	2.63e-14	-7.62	-0.0405	0.0346	0.242	-1.17	-0.0798	0.0175	5.29e-06	-4.55	-0.0685	0.0163	2.63e-05	-4.2	-0.0854	0.0192	8.88e-06	-4.44
-0.0513	0.00675	1.22e-08	2.7e-14	-7.61	-0.0443	0.0287	0.123	-1.54	-0.0514	0.0105	1.09e-06	-4.87	-0.0619	0.0126	8.63e-07	-4.92	-0.0406	0.0135	0.00272	-3
0.0761	0.01	1.33e-08	2.93e-14	7.6	0.124	0.04	0.00195	3.1	0.0807	0.0161	5.61e-07	5	0.0537	0.0176	0.00225	3.06	0.087	0.021	3.33e-05	4.15
-0.0508	0.00669	1.33e-08	2.95e-14	-7.6	-0.0207	0.0249	0.407	-0.829	-0.0478	0.0103	3.25e-06	-4.65	-0.0496	0.0124	5.99e-05	-4.01	-0.0688	0.0145	2.22e-06	-4.73
-0.133	0.0175	1.35e-08	2.97e-14	-7.6	-0.195	0.0715	0.00642	-2.73	-0.126	0.0262	1.47e-06	-4.82	-0.0817	0.0334	0.0144	-2.45	-0.197	0.0378	1.81e-07	-5.22
0.0768	0.0101	1.4e-08	3.09e-14	7.59	0.0891	0.0369	0.0159	2.41	0.097	0.0176	3.37e-08	5.52	0.0575	0.0179	0.0013	3.21	0.0717	0.0193	0.000212	3.7
0.0599	0.00789	1.44e-08	3.19e-14	7.59	0.152	0.0334	5.58e-06	4.54	0.0699	0.0138	3.89e-07	5.07	0.0355	0.0135	0.00828	2.64	0.0598	0.0151	7.71e-05	3.95
-0.0637	0.0084	1.48e-08	3.27e-14	-7.59	-0.0887	0.0313	0.00468	-2.83	-0.0801	0.0142	1.79e-08	-5.63	-0.0453	0.0149	0.00237	-3.04	-0.0574	0.0164	0.000468	-3.5
0.0747	0.00985	1.54e-08	3.41e-14	7.58	0.142	0.0362	9.41e-05	3.91	0.0803	0.0166	1.41e-06	4.82	0.0505	0.0177	0.0042	2.86	0.0771	0.0192	5.77e-05	4.02
-0.0692	0.00915	1.8e-08	3.98e-14	-7.56	-0.063	0.0306	0.0396	-2.06	-0.0614	0.0141	1.38e-05	-4.35	-0.074	0.0175	2.35e-05	-4.23	-0.0804	0.0196	3.91e-05	-4.11
0.0799	0.0106	1.81e-08	4.01e-14	7.56	0.111	0.0399	0.00564	2.77	0.0848	0.017	5.97e-07	4.99	0.0744	0.0197	0.000154	3.78	0.0702	0.021	0.000808	3.35
-0.0744	0.00985	1.87e-08	4.12e-14	-7.56	-0.0227	0.0316	0.472	-0.719	-0.0712	0.016	8.82e-06	-4.44	-0.0684	0.0176	9.97e-05	-3.89	-0.113	0.0214	1.38e-07	-5.27
-0.0831	0.011	1.88e-08	4.15e-14	-7.56	-0.0943	0.0385	0.0144	-2.45	-0.103	0.0176	5.9e-09	-5.82	-0.0629	0.0208	0.00252	-3.02	-0.0716	0.0219	0.00111	-3.26
-0.0848	0.0112	1.92e-08	4.25e-14	-7.55	-0.133	0.0469	0.00457	-2.84	-0.0825	0.0169	9.94e-07	-4.89	-0.0798	0.0213	0.000177	-3.75	-0.0831	0.0238	0.000491	-3.49
0.0524	0.00694	1.95e-08	4.31e-14	7.55	0.0911	0.0287	0.00153	3.17	0.0532	0.0121	1.06e-05	4.41	0.0366	0.0123	0.00294	2.97	0.061	0.0128	1.95e-06	4.76
0.0843	0.0112	1.95e-08	4.31e-14	7.55	0.213	0.0526	4.97e-05	4.06	0.0714	0.0163	1.16e-05	4.39	0.0809	0.0217	0.000188	3.73	0.0897	0.0239	0.000171	3.76
-0.0534	0.00708	1.95e-08	4.32e-14	-7.55	-0.101	0.0274	0.000227	-3.69	-0.0509	0.0115	1.03e-05	-4.41	-0.0344	0.0122	0.00472	-2.83	-0.0728	0.0151	1.5e-06	-4.81
0.1	0.0133	2.1e-08	4.64e-14	7.54	0.186	0.0513	0.000294	3.62	0.123	0.0213	8.44e-09	5.76	0.0552	0.0243	0.0232	2.27	0.0966	0.027	0.000349	3.58
-0.0977	0.013	2.43e-08	5.36e-14	-7.52	-0.0905	0.0436	0.038	-2.08	-0.0956	0.022	1.45e-05	-4.34	-0.11	0.024	4.76e-06	-4.58	-0.0897	0.0249	0.000318	-3.6
-0.0728	0.00969	2.68e-08	5.93e-14	-7.51	-0.101	0.0333	0.00247	-3.03	-0.0588	0.016	0.000237	-3.68	-0.066	0.0176	0.00017	-3.76	-0.0926	0.0196	2.44e-06	-4.71
-0.0826	0.011	2.89e-08	6.39e-14	-7.5	-0.111	0.0435	0.0106	-2.56	-0.106	0.0186	1.35e-08	-5.68	-0.0569	0.0197	0.00392	-2.88	-0.0755	0.021	0.000327	-3.59
0.0876	0.0117	3.2e-08	7.06e-14	7.49	0.116	0.0367	0.0016	3.16	0.134	0.0218	8.72e-10	6.13	0.0565	0.0211	0.00724	2.69	0.0659	0.0213	0.00197	3.09
0.0635	0.00849	3.39e-08	7.49e-14	7.48	0.111	0.0349	0.00146	3.18	0.0639	0.0141	5.85e-06	4.53	0.0489	0.0143	0.00066	3.41	0.0731	0.0178	4.02e-05	4.11
-0.0956	0.0128	3.72e-08	8.22e-14	-7.47	-0.184	0.0473	0.000101	-3.89	-0.111	0.0212	1.86e-07	-5.21	-0.0677	0.0234	0.00387	-2.89	-0.0818	0.0249	0.000997	-3.29
0.121	0.0162	4.14e-08	9.15e-14	7.45	0.263	0.0529	6.32e-07	4.98	0.145	0.0277	1.56e-07	5.25	0.0717	0.0297	0.0155	2.42	0.0942	0.0317	0.00291	2.98
-0.11	0.0147	4.39e-08	9.69e-14	-7.45	-0.011	0.0572	0.848	-0.192	-0.103	0.0234	1.07e-05	-4.4	-0.145	0.0266	5.1e-08	-5.45	-0.103	0.0307	0.000819	-3.35
0.0735	0.00989	4.57e-08	1.01e-13	7.44	0.167	0.0408	4.41e-05	4.08	0.0659	0.0168	8.37e-05	3.93	0.0629	0.0175	0.000335	3.59	0.0757	0.0188	5.93e-05	4.02
-0.0643	0.00866	5.03e-08	1.11e-13	-7.43	-0.0674	0.0247	0.00626	-2.73	-0.077	0.0187	3.98e-05	-4.11	-0.077	0.0139	2.84e-08	-5.55	-0.0349	0.0165	0.0347	-2.11
0.0645	0.00869	5.27e-08	1.16e-13	7.42	0.0677	0.0325	0.0372	2.08	0.0681	0.0142	1.53e-06	4.81	0.0722	0.016	6.63e-06	4.51	0.0496	0.0171	0.00379	2.9
-0.0899	0.0121	5.32e-08	1.17e-13	-7.42	-0.23	0.061	0.000156	-3.78	-0.0697	0.0166	2.63e-05	-4.2	-0.0847	0.0237	0.000354	-3.57	-0.13	0.0298	1.33e-05	-4.35
0.0576	0.00776	5.36e-08	1.18e-13	7.42	0.122	0.0326	0.000176	3.75	0.0533	0.0129	3.72e-05	4.12	0.0409	0.0138	0.00299	2.97	0.0695	0.0151	3.96e-06	4.61
-0.0989	0.0133	5.57e-08	1.23e-13	-7.41	-0.0429	0.0493	0.384	-0.87	-0.107	0.0203	1.27e-07	-5.28	-0.0878	0.0242	0.000294	-3.62	-0.119	0.0305	9.26e-05	-3.91
-0.12	0.0162	6.4e-08	1.42e-13	-7.39	-0.0518	0.0446	0.246	-1.16	-0.114	0.0312	0.000239	-3.67	-0.174	0.032	5.03e-08	-5.45	-0.109	0.0276	8e-05	-3.94
0.0815	0.011	6.49e-08	1.43e-13	7.39	0.129	0.0435	0.00291	2.98	0.102	0.0178	1.21e-08	5.7	0.0702	0.0198	0.000392	3.55	0.0517	0.0223	0.0208	2.31
-0.0646	0.00874	6.66e-08	1.47e-13	-7.39	-0.0626	0.0237	0.00835	-2.64	-0.0726	0.0154	2.32e-06	-4.72	-0.0665	0.0156	2.01e-05	-4.26	-0.0516	0.0183	0.00479	-2.82
-0.126	0.017	6.91e-08	1.53e-13	-7.38	-0.0588	0.061	0.335	-0.964	-0.096	0.0283	0.000705	-3.39	-0.136	0.0321	2.35e-05	-4.23	-0.174	0.0323	7.79e-08	-5.37
-0.0686	0.00929	6.96e-08	1.54e-13	-7.38	-0.132	0.0328	5.31e-05	-4.04	-0.0451	0.0135	0.000873	-3.33	-0.0723	0.0175	3.47e-05	-4.14	-0.0982	0.0228	1.69e-05	-4.3
0.0862	0.0117	7.11e-08	1.57e-13	7.38	0.0666	0.0444	0.133	1.5	0.104	0.019	4.43e-08	5.47	0.0846	0.022	0.000122	3.84	0.0683	0.0225	0.00241	3.03
0.0538	0.00732	8.86e-08	1.96e-13	7.35	0.062	0.0245	0.0114	2.53	0.0557	0.0133	2.75e-05	4.19	0.0546	0.0131	3.19e-05	4.16	0.0487	0.0135	0.000305	3.61
-0.113	0.0153	9.21e-08	2.03e-13	-7.35	-0.11	0.0619	0.0755	-1.78	-0.0943	0.0236	6.6e-05	-3.99	-0.0989	0.0289	0.000616	-3.42	-0.162	0.0315	2.68e-07	-5.14
-0.0899	0.0122	9.35e-08	2.07e-13	-7.34	-0.173	0.0451	0.00012	-3.85	-0.052	0.0202	0.00994	-2.58	-0.0886	0.0209	2.2e-05	-4.24	-0.129	0.0265	1.16e-06	-4.86
-0.0707	0.00962	9.43e-08	2.08e-13	-7.34	-0.141	0.0337	2.98e-05	-4.18	-0.0946	0.0167	1.37e-08	-5.68	-0.0332	0.0164	0.0436	-2.02	-0.0671	0.0195	0.000596	-3.43
0.0705	0.00961	9.86e-08	2.18e-13	7.34	0.111	0.0337	0.000927	3.31	0.0735	0.0168	1.27e-05	4.36	0.0426	0.0174	0.0142	2.45	0.0855	0.018	1.98e-06	4.75
-0.0849	0.0116	1.01e-07	2.22e-13	-7.33	-0.0783	0.0422	0.0634	-1.86	-0.108	0.0187	8.73e-09	-5.75	-0.0557	0.0218	0.0107	-2.55	-0.0848	0.0226	0.000179	-3.75
-0.0411	0.00561	1.07e-07	2.36e-13	-7.33	-0.051	0.0202	0.0118	-2.52	-0.0265	0.0104	0.0113	-2.53	-0.0449	0.00987	5.39e-06	-4.55	-0.0484	0.0101	1.55e-06	-4.8
-0.0893	0.0122	1.1e-07	2.43e-13	-7.32	-0.0546	0.0415	0.189	-1.31	-0.0738	0.0177	3.09e-05	-4.17	-0.101	0.0245	3.99e-05	-4.11	-0.128	0.0278	3.89e-06	-4.62
-0.0822	0.0113	1.22e-07	2.69e-13	-7.31	-0.028	0.0408	0.492	-0.687	-0.0827	0.0176	2.52e-06	-4.71	-0.0833	0.0205	4.82e-05	-4.06	-0.0994	0.0244	4.76e-05	-4.07
0.0792	0.0108	1.24e-07	2.73e-13	7.31	0.127	0.04	0.00157	3.16	0.0786	0.0187	2.68e-05	4.2	0.0733	0.0194	0.000163	3.77	0.074	0.0204	0.000294	3.62
0.0834	0.0114	1.29e-07	2.85e-13	7.3	0.172	0.0393	1.2e-05	4.38	0.0788	0.0214	0.000235	3.68	0.0538	0.0198	0.00668	2.71	0.0955	0.0209	4.71e-06	4.58
-0.0578	0.00792	1.31e-07	2.9e-13	-7.3	-0.0583	0.0263	0.0264	-2.22	-0.0826	0.0169	9.87e-07	-4.89	-0.0319	0.0133	0.0167	-2.39	-0.0685	0.0136	5.15e-07	-5.02
0.0744	0.0102	1.32e-07	2.91e-13	7.3	0.164	0.0364	6.75e-06	4.5	0.0743	0.0177	2.6e-05	4.21	0.0508	0.0176	0.00392	2.88	0.0778	0.0202	0.000116	3.85
-0.0511	0.007	1.33e-07	2.93e-13	-7.3	-0.0358	0.0293	0.221	-1.22	-0.0483	0.0102	2.22e-06	-4.73	-0.0456	0.0137	0.000885	-3.32	-0.0683	0.0152	7.39e-06	-4.48
-0.0851	0.0117	1.41e-07	3.12e-13	-7.29	-0.111	0.0453	0.0145	-2.44	-0.0815	0.0196	3.14e-05	-4.16	-0.0653	0.0205	0.00146	-3.18	-0.109	0.0232	2.69e-06	-4.69
-0.0862	0.0118	1.45e-07	3.21e-13	-7.29	0.0328	0.0386	0.396	0.849	-0.0824	0.0207	7.02e-05	-3.98	-0.107	0.0222	1.4e-06	-4.83	-0.108	0.0218	6.75e-07	-4.97
-0.0774	0.0106	1.5e-07	3.31e-13	-7.28	-0.0384	0.0383	0.316	-1	-0.0679	0.0176	0.000113	-3.86	-0.0856	0.019	6.99e-06	-4.49	-0.0932	0.0214	1.33e-05	-4.35
-0.0604	0.0083	1.55e-07	3.43e-13	-7.28	-0.0436	0.0267	0.102	-1.63	-0.0519	0.013	6.13e-05	-4.01	-0.0684	0.0157	1.3e-05	-4.36	-0.0739	0.018	4.04e-05	-4.11
0.0541	0.00744	1.66e-07	3.67e-13	7.27	0.0824	0.0311	0.00805	2.65	0.0562	0.0125	6.83e-06	4.5	0.0544	0.0131	3.47e-05	4.14	0.0447	0.0144	0.00185	3.11
-0.0868	0.012	1.68e-07	3.71e-13	-7.27	-0.0692	0.0455	0.128	-1.52	-0.089	0.0199	7.8e-06	-4.47	-0.0696	0.0223	0.00177	-3.13	-0.106	0.0225	2.45e-06	-4.71
-0.0792	0.0109	1.68e-07	3.71e-13	-7.27	-0.157	0.0358	1.15e-05	-4.39	-0.0992	0.02	6.71e-07	-4.97	-0.0363	0.019	0.0561	-1.91	-0.0824	0.0206	6.25e-05	-4
0.0847	0.0117	1.79e-07	3.95e-13	7.26	0.145	0.0474	0.00223	3.06	0.101	0.0198	3.29e-07	5.11	0.0803	0.0203	7.53e-05	3.96	0.0544	0.0228	0.0171	2.39
-0.0494	0.00681	1.79e-07	3.96e-13	-7.26	-0.0731	0.0295	0.0132	-2.48	-0.0601	0.0112	8.89e-08	-5.35	-0.0251	0.0121	0.039	-2.06	-0.0587	0.0132	8.97e-06	-4.44
-0.0419	0.00579	1.92e-07	4.24e-13	-7.25	-0.0413	0.0207	0.0455	-2	-0.0394	0.00973	5.19e-05	-4.05	-0.0447	0.0108	3.28e-05	-4.15	-0.0425	0.011	0.000105	-3.88
-0.0494	0.00682	1.97e-07	4.34e-13	-7.24	-0.0459	0.0228	0.0441	-2.01	-0.0492	0.0107	4.46e-06	-4.59	-0.0452	0.0133	0.000679	-3.4	-0.0555	0.0138	5.87e-05	-4.02
-0.0835	0.0115	1.97e-07	4.36e-13	-7.24	-0.0938	0.0407	0.0212	-2.3	-0.054	0.0183	0.00317	-2.95	-0.105	0.0212	6.93e-07	-4.96	-0.103	0.0241	2.02e-05	-4.26
-0.0584	0.00806	1.99e-07	4.39e-13	-7.24	-0.106	0.034	0.00189	-3.11	-0.0687	0.0128	8.97e-08	-5.35	-0.0318	0.0144	0.027	-2.21	-0.0652	0.0166	8.29e-05	-3.94
0.206	0.0284	1.99e-07	4.39e-13	7.24	0.0835	0.109	0.442	0.769	0.233	0.0451	2.26e-07	5.18	0.191	0.0506	0.000157	3.78	0.214	0.0604	0.000401	3.54
0.0761	0.0105	2.03e-07	4.49e-13	7.24	0.15	0.0392	0.000131	3.82	0.0857	0.0177	1.35e-06	4.83	0.0501	0.0186	0.00708	2.69	0.0747	0.0207	0.000314	3.6
-0.0719	0.00994	2.06e-07	4.56e-13	-7.24	-0.115	0.044	0.00899	-2.61	-0.0915	0.0152	1.9e-09	-6.01	-0.0628	0.0195	0.00131	-3.21	-0.0411	0.0193	0.0333	-2.13
0.107	0.0148	2.21e-07	4.89e-13	7.23	0.202	0.0515	8.47e-05	3.93	0.117	0.0271	1.5e-05	4.33	0.0814	0.0268	0.00235	3.04	0.0965	0.0263	0.000244	3.67
0.1	0.0139	2.32e-07	5.13e-13	7.22	0.227	0.0548	3.5e-05	4.14	0.0987	0.0209	2.22e-06	4.73	0.084	0.0263	0.00139	3.2	0.0869	0.0301	0.00389	2.89
-0.0938	0.013	2.48e-07	5.47e-13	-7.21	-0.19	0.0521	0.000268	-3.64	-0.137	0.0224	1.03e-09	-6.1	-0.041	0.0224	0.0676	-1.83	-0.0837	0.0254	0.000963	-3.3
-0.14	0.0194	2.49e-07	5.51e-13	-7.21	-0.0943	0.0715	0.187	-1.32	-0.156	0.032	1.17e-06	-4.86	-0.144	0.0343	2.7e-05	-4.2	-0.124	0.0394	0.0017	-3.14
-0.0682	0.00945	2.49e-07	5.51e-13	-7.21	-0.161	0.0539	0.00281	-2.99	-0.0299	0.0128	0.019	-2.35	-0.0927	0.0176	1.41e-07	-5.26	-0.151	0.0259	5.46e-09	-5.83
-0.103	0.0142	2.62e-07	5.8e-13	-7.21	-0.258	0.0798	0.00121	-3.24	-0.107	0.0183	4.77e-09	-5.86	-0.0536	0.0303	0.0765	-1.77	-0.122	0.0372	0.00102	-3.29
0.106	0.0147	2.63e-07	5.81e-13	7.2	0.114	0.0421	0.00673	2.71	0.168	0.0284	3.28e-09	5.92	0.0672	0.0254	0.0082	2.64	0.0894	0.0282	0.00152	3.17
-0.0712	0.00989	2.77e-07	6.11e-13	-7.2	-0.104	0.0365	0.00455	-2.84	-0.0775	0.0163	1.96e-06	-4.76	-0.0526	0.0175	0.00263	-3.01	-0.0766	0.0203	0.000162	-3.77
-0.0724	0.0101	2.77e-07	6.12e-13	-7.2	-0.059	0.0364	0.104	-1.62	-0.0576	0.0157	0.000251	-3.66	-0.0707	0.0191	0.00022	-3.69	-0.104	0.0206	4.4e-07	-5.05
0.0501	0.00696	2.77e-07	6.13e-13	7.2	0.0708	0.0291	0.0152	2.43	0.0525	0.0115	5.03e-06	4.56	0.0496	0.0127	9.09e-05	3.91	0.0431	0.0133	0.00114	3.25
-0.105	0.0146	2.99e-07	6.6e-13	-7.19	-0.061	0.0523	0.244	-1.17	-0.085	0.0228	0.000191	-3.73	-0.113	0.0264	1.81e-05	-4.29	-0.147	0.0319	3.84e-06	-4.62
-0.0817	0.0114	2.99e-07	6.61e-13	-7.19	-0.0805	0.0454	0.0759	-1.77	-0.0373	0.0173	0.0314	-2.15	-0.111	0.0223	5.87e-07	-5	-0.128	0.0229	2.08e-08	-5.61
-0.0495	0.00688	3.01e-07	6.64e-13	-7.19	-0.0345	0.0271	0.203	-1.27	-0.0412	0.0116	0.0004	-3.54	-0.0401	0.0127	0.00153	-3.17	-0.0721	0.0128	1.59e-08	-5.65
0.0876	0.0122	3.51e-07	7.75e-13	7.17	0.043	0.0558	0.441	0.771	0.0833	0.0201	3.38e-05	4.15	0.0835	0.0203	3.83e-05	4.12	0.112	0.0262	2.03e-05	4.26
0.0803	0.0112	3.52e-07	7.77e-13	7.17	0.188	0.0513	0.000252	3.66	0.0642	0.0164	8.99e-05	3.92	0.0606	0.0212	0.0042	2.86	0.119	0.0248	1.55e-06	4.8
0.038	0.0053	3.72e-07	8.23e-13	7.16	0.0466	0.0192	0.0151	2.43	0.0452	0.00877	2.53e-07	5.16	0.0377	0.00993	0.00015	3.79	0.0261	0.0101	0.01	2.57
0.127	0.0178	3.8e-07	8.39e-13	7.15	0.203	0.0642	0.00159	3.16	0.166	0.0309	7.81e-08	5.37	0.0629	0.0317	0.0473	1.98	0.134	0.0339	8.12e-05	3.94
0.0711	0.00994	3.87e-07	8.55e-13	7.15	0.177	0.04	9.32e-06	4.43	0.052	0.0175	0.00291	2.98	0.0517	0.0172	0.00259	3.01	0.0929	0.0188	7.73e-07	4.94
-0.0551	0.00771	3.98e-07	8.78e-13	-7.15	-0.0506	0.0297	0.0882	-1.71	-0.0444	0.0129	0.000561	-3.45	-0.0542	0.0135	5.88e-05	-4.02	-0.0731	0.0155	2.44e-06	-4.71
0.156	0.0218	4.15e-07	9.18e-13	7.14	0.2	0.0748	0.00754	2.67	0.193	0.0364	1.12e-07	5.31	0.122	0.0411	0.00303	2.97	0.128	0.0418	0.00213	3.07
0.087	0.0122	4.18e-07	9.23e-13	7.14	0.151	0.0409	0.000212	3.7	0.101	0.0216	2.88e-06	4.68	0.0506	0.0223	0.0229	2.27	0.0893	0.0225	7.1e-05	3.97
-0.108	0.0152	5.07e-07	1.12e-12	-7.11	-0.259	0.062	2.92e-05	-4.18	-0.0487	0.0219	0.0262	-2.22	-0.143	0.0293	1.07e-06	-4.88	-0.164	0.0353	3.32e-06	-4.65
-0.0728	0.0102	5.18e-07	1.15e-12	-7.11	-0.0603	0.0335	0.0716	-1.8	-0.0699	0.0195	0.000338	-3.58	-0.0695	0.018	0.000113	-3.86	-0.0829	0.0185	7.5e-06	-4.48
-0.0667	0.00938	5.27e-07	1.16e-12	-7.11	-0.0871	0.0337	0.00972	-2.59	-0.0559	0.0157	0.00036	-3.57	-0.0624	0.0169	0.00022	-3.7	-0.0806	0.0185	1.35e-05	-4.35
-0.127	0.0179	6.26e-07	1.38e-12	-7.09	-0.151	0.0605	0.0126	-2.49	-0.148	0.0295	5.39e-07	-5.01	-0.123	0.0327	0.000166	-3.77	-0.0906	0.0359	0.0116	-2.52
-0.0511	0.00722	6.46e-07	1.43e-12	-7.08	-0.0439	0.0261	0.0922	-1.68	-0.0422	0.0109	0.000113	-3.86	-0.0586	0.0141	3.4e-05	-4.14	-0.0619	0.0151	4.27e-05	-4.09
-0.0396	0.00559	6.75e-07	1.49e-12	-7.08	-0.0316	0.0213	0.138	-1.48	-0.0347	0.00897	0.00011	-3.87	-0.043	0.0101	1.93e-05	-4.27	-0.0455	0.0116	8.41e-05	-3.93
0.0897	0.0127	6.8e-07	1.5e-12	7.07	0.189	0.0535	0.000413	3.53	0.0926	0.0205	5.97e-06	4.53	0.0705	0.0234	0.00258	3.01	0.0858	0.0246	0.000488	3.49
-0.0645	0.00913	6.88e-07	1.52e-12	-7.07	-0.0188	0.0331	0.571	-0.566	-0.0802	0.0159	4.24e-07	-5.06	-0.0537	0.0159	0.000712	-3.38	-0.0718	0.0178	5.75e-05	-4.02
-0.0583	0.00825	7.16e-07	1.58e-12	-7.07	-0.106	0.0275	0.000113	-3.86	-0.077	0.015	2.77e-07	-5.14	-0.0365	0.0138	0.00802	-2.65	-0.0498	0.0166	0.00275	-2.99
0.109	0.0155	7.17e-07	1.58e-12	7.07	0.0302	0.0567	0.594	0.533	0.139	0.0252	3.71e-08	5.5	0.0803	0.0293	0.00614	2.74	0.12	0.0298	5.49e-05	4.03
0.0707	0.01	7.47e-07	1.65e-12	7.06	0.104	0.0357	0.00355	2.92	0.0858	0.0178	1.4e-06	4.82	0.0563	0.0174	0.00119	3.24	0.061	0.0192	0.00148	3.18
0.0959	0.0136	8.21e-07	1.81e-12	7.05	0.225	0.0543	3.56e-05	4.13	0.087	0.021	3.33e-05	4.15	0.0566	0.0252	0.0245	2.25	0.128	0.0287	8.78e-06	4.45
0.0653	0.00927	8.52e-07	1.88e-12	7.04	0.122	0.0387	0.00168	3.14	0.0745	0.0152	8.88e-07	4.91	0.0502	0.0161	0.00177	3.13	0.0582	0.0191	0.00229	3.05
-0.104	0.0148	8.53e-07	1.88e-12	-7.04	-0.176	0.0536	0.00103	-3.28	-0.149	0.0251	2.48e-09	-5.96	-0.0458	0.026	0.0786	-1.76	-0.0952	0.0296	0.00129	-3.22
-0.0354	0.00502	8.59e-07	1.9e-12	-7.04	-0.0323	0.0221	0.144	-1.46	-0.0381	0.00815	2.91e-06	-4.68	-0.0383	0.0092	3.05e-05	-4.17	-0.0288	0.00967	0.00288	-2.98
-0.0626	0.00889	8.67e-07	1.91e-12	-7.04	-0.0368	0.0312	0.238	-1.18	-0.0662	0.0149	8.75e-06	-4.45	-0.0559	0.0161	0.000528	-3.47	-0.0736	0.0175	2.57e-05	-4.21
-0.107	0.0152	8.83e-07	1.95e-12	-7.04	-0.163	0.0436	0.000186	-3.74	-0.139	0.0287	1.25e-06	-4.85	-0.0827	0.0279	0.00305	-2.96	-0.0781	0.0276	0.00458	-2.83
-0.0801	0.0114	9.04e-07	2e-12	-7.03	-0.0535	0.0409	0.19	-1.31	-0.0587	0.0185	0.00154	-3.17	-0.103	0.02	2.79e-07	-5.14	-0.0925	0.0242	0.000128	-3.83
-0.135	0.0192	9.16e-07	2.02e-12	-7.03	-0.123	0.0707	0.0829	-1.73	-0.143	0.0336	2.04e-05	-4.26	-0.164	0.0346	2.25e-06	-4.73	-0.0992	0.0357	0.00546	-2.78
0.0683	0.00971	9.32e-07	2.06e-12	7.03	0.0164	0.0334	0.623	0.491	0.0783	0.0171	4.52e-06	4.59	0.0692	0.0188	0.000225	3.69	0.0711	0.0171	3.14e-05	4.16
-0.0432	0.00614	9.47e-07	2.09e-12	-7.03	-0.0456	0.0263	0.0822	-1.74	-0.0413	0.0102	4.98e-05	-4.06	-0.0427	0.0108	7.93e-05	-3.95	-0.0458	0.0121	0.000145	-3.8
0.0708	0.0101	9.58e-07	2.12e-12	7.03	0.0672	0.0393	0.0869	1.71	0.0773	0.0161	1.46e-06	4.82	0.0561	0.0186	0.00251	3.02	0.0787	0.0203	0.000104	3.88
-0.0906	0.0129	9.64e-07	2.13e-12	-7.03	-0.0558	0.0424	0.189	-1.31	-0.105	0.0221	1.85e-06	-4.77	-0.066	0.0237	0.00544	-2.78	-0.11	0.0247	7.73e-06	-4.47
0.0782	0.0111	9.79e-07	2.16e-12	7.02	0.196	0.0422	3.48e-06	4.64	0.0863	0.02	1.61e-05	4.31	0.0653	0.0195	0.000803	3.35	0.0561	0.0205	0.00625	2.73
0.0784	0.0112	1.06e-06	2.34e-12	7.01	0.203	0.0425	1.81e-06	4.77	0.0822	0.0209	8.27e-05	3.94	0.0607	0.0186	0.00114	3.25	0.0666	0.0209	0.00144	3.19
0.0816	0.0117	1.12e-06	2.47e-12	7.01	0.171	0.0412	3.39e-05	4.15	0.0751	0.0204	0.000226	3.69	0.0541	0.0208	0.0093	2.6	0.0947	0.0221	1.79e-05	4.29
-0.045	0.00642	1.13e-06	2.49e-12	-7	-0.0975	0.0281	0.000524	-3.47	-0.0433	0.00994	1.31e-05	-4.36	-0.0414	0.0111	0.000206	-3.71	-0.0408	0.0145	0.00478	-2.82
0.0645	0.00922	1.15e-06	2.54e-12	7	0.108	0.0344	0.00174	3.13	0.0416	0.016	0.00909	2.61	0.0625	0.0159	8.42e-05	3.93	0.0846	0.0181	2.99e-06	4.67
-0.0951	0.0136	1.2e-06	2.66e-12	-6.99	-0.0939	0.0538	0.0808	-1.75	-0.103	0.0211	1.16e-06	-4.86	-0.0964	0.0256	0.000172	-3.76	-0.0809	0.0277	0.00353	-2.92
0.0705	0.0101	1.28e-06	2.83e-12	6.99	0.094	0.0428	0.0279	2.2	0.0718	0.0165	1.29e-05	4.36	0.0691	0.0181	0.000134	3.82	0.0652	0.0199	0.00105	3.28
-0.041	0.00588	1.34e-06	2.96e-12	-6.98	-0.0485	0.0212	0.022	-2.29	-0.0547	0.0108	4.31e-07	-5.05	-0.0354	0.0105	0.000777	-3.36	-0.032	0.0104	0.00218	-3.06
0.0611	0.00875	1.38e-06	3.05e-12	6.98	0.135	0.0338	6.83e-05	3.98	0.085	0.0145	4.37e-09	5.87	0.0244	0.0151	0.108	1.61	0.055	0.0181	0.00243	3.03
-0.0561	0.00804	1.39e-06	3.08e-12	-6.97	-0.104	0.0358	0.00373	-2.9	-0.0639	0.0132	1.28e-06	-4.84	-0.0367	0.0139	0.00845	-2.63	-0.0608	0.0163	0.000183	-3.74
-0.0807	0.0116	1.41e-06	3.11e-12	-6.97	-0.11	0.0422	0.0091	-2.61	-0.0659	0.0186	0.000395	-3.54	-0.0785	0.0214	0.000244	-3.67	-0.0974	0.0233	2.97e-05	-4.18
0.0601	0.00862	1.46e-06	3.23e-12	6.97	0.0584	0.0336	0.0819	1.74	0.0731	0.0148	7.44e-07	4.95	0.0416	0.0154	0.00669	2.71	0.0653	0.0163	6.37e-05	4
0.108	0.0156	1.5e-06	3.32e-12	6.96	0.0658	0.0555	0.235	1.19	0.111	0.0239	3.1e-06	4.66	0.111	0.0305	0.000256	3.66	0.114	0.0322	0.000385	3.55
0.0841	0.0121	1.51e-06	3.33e-12	6.96	0.199	0.0459	1.43e-05	4.34	0.113	0.0215	1.54e-07	5.25	0.0357	0.0203	0.0789	1.76	0.0843	0.0236	0.000347	3.58
-0.0907	0.013	1.51e-06	3.34e-12	-6.96	-0.113	0.0481	0.0185	-2.36	-0.0851	0.0211	5.51e-05	-4.03	-0.0959	0.0242	7.2e-05	-3.97	-0.0866	0.0258	0.000789	-3.36
0.0693	0.00996	1.55e-06	3.42e-12	6.96	0.154	0.0409	0.000167	3.76	0.0638	0.0167	0.000131	3.82	0.0632	0.0175	0.000305	3.61	0.0651	0.0195	0.000843	3.34
-0.0466	0.0067	1.58e-06	3.5e-12	-6.96	-0.0352	0.023	0.127	-1.53	-0.0673	0.0118	1.25e-08	-5.69	-0.0384	0.0119	0.00121	-3.24	-0.0355	0.0128	0.00549	-2.78
-0.0733	0.0106	1.68e-06	3.72e-12	-6.95	-0.0891	0.0345	0.00991	-2.58	-0.0574	0.0174	0.000937	-3.31	-0.0717	0.019	0.000163	-3.77	-0.0949	0.0221	1.74e-05	-4.3
0.0862	0.0124	1.77e-06	3.92e-12	6.94	0.145	0.0573	0.0114	2.53	0.0767	0.0194	7.52e-05	3.96	0.0788	0.023	0.000613	3.43	0.0993	0.0248	6.23e-05	4
0.0503	0.00725	1.78e-06	3.94e-12	6.94	0.139	0.0433	0.00137	3.2	0.0636	0.0119	1.01e-07	5.33	0.0303	0.012	0.0117	2.52	0.0501	0.0149	0.000741	3.37
0.0695	0.01	1.82e-06	4.03e-12	6.94	0.0539	0.0348	0.121	1.55	0.101	0.0186	5.45e-08	5.44	0.0548	0.0177	0.00192	3.1	0.0591	0.0181	0.00109	3.27
-0.131	0.0189	1.84e-06	4.06e-12	-6.94	-0.157	0.0644	0.0147	-2.44	-0.132	0.0321	4.02e-05	-4.11	-0.163	0.0371	1.19e-05	-4.38	-0.0969	0.0343	0.00474	-2.82
0.0563	0.00813	1.87e-06	4.13e-12	6.93	0.19	0.0416	5.08e-06	4.56	0.0485	0.0108	6.95e-06	4.5	0.0394	0.0166	0.0178	2.37	0.0782	0.0206	0.000147	3.8
-0.0378	0.00547	2.02e-06	4.46e-12	-6.92	-0.0402	0.0185	0.0298	-2.17	-0.0452	0.00977	3.63e-06	-4.63	-0.0341	0.00976	0.000477	-3.49	-0.0331	0.0102	0.0012	-3.24
-0.0542	0.00783	2.09e-06	4.63e-12	-6.92	-0.0639	0.0308	0.0379	-2.08	-0.0645	0.0124	1.82e-07	-5.22	-0.0365	0.0144	0.0109	-2.55	-0.0561	0.0161	0.000488	-3.49
0.0868	0.0126	2.15e-06	4.74e-12	6.91	0.124	0.047	0.00833	2.64	0.0675	0.0196	0.000567	3.45	0.118	0.0237	6.32e-07	4.98	0.072	0.0257	0.00517	2.8
-0.146	0.0211	2.2e-06	4.85e-12	-6.91	-0.0452	0.0699	0.518	-0.647	-0.164	0.0372	1.11e-05	-4.4	-0.175	0.0384	4.96e-06	-4.57	-0.127	0.0395	0.00134	-3.21
-0.0487	0.00706	2.25e-06	4.97e-12	-6.91	-0.0413	0.0258	0.11	-1.6	-0.0602	0.0121	7.02e-07	-4.96	-0.0402	0.0124	0.00124	-3.23	-0.0466	0.0137	0.000668	-3.4
0.0604	0.00875	2.39e-06	5.28e-12	6.9	0.137	0.0329	3.21e-05	4.16	0.0347	0.0149	0.0202	2.32	0.0504	0.0149	0.00073	3.38	0.0885	0.0178	6.47e-07	4.98
0.0645	0.00935	2.4e-06	5.3e-12	6.9	0.023	0.035	0.51	0.658	0.0804	0.0157	3.04e-07	5.12	0.0416	0.0172	0.0157	2.42	0.0792	0.0177	7.94e-06	4.47
0.072	0.0105	2.61e-06	5.76e-12	6.89	0.162	0.0435	0.000192	3.73	0.073	0.0163	7.8e-06	4.47	0.0566	0.0195	0.00372	2.9	0.0669	0.0211	0.0015	3.18
-0.0421	0.00612	2.62e-06	5.79e-12	-6.88	-0.079	0.0277	0.00436	-2.85	-0.0472	0.00959	8.84e-07	-4.92	-0.0268	0.0109	0.014	-2.46	-0.0465	0.0128	0.000276	-3.64
-0.146	0.0212	2.64e-06	5.83e-12	-6.88	-0.133	0.0784	0.0902	-1.69	-0.168	0.035	1.55e-06	-4.8	-0.128	0.0396	0.00125	-3.23	-0.138	0.0404	0.000627	-3.42
-0.129	0.0188	3.07e-06	6.79e-12	-6.86	-0.198	0.0716	0.00582	-2.76	-0.0802	0.0281	0.00435	-2.85	-0.168	0.0349	1.47e-06	-4.82	-0.158	0.0425	0.000202	-3.72
0.053	0.00773	3.08e-06	6.81e-12	6.86	0.0759	0.0257	0.00307	2.96	0.0761	0.0124	8.74e-10	6.13	0.0247	0.0155	0.111	1.59	0.0385	0.0148	0.00926	2.6
-0.0628	0.00916	3.12e-06	6.89e-12	-6.86	-0.117	0.0326	0.000325	-3.59	-0.0752	0.015	5.58e-07	-5.01	-0.0344	0.0169	0.0415	-2.04	-0.0608	0.0181	0.000797	-3.35
-0.107	0.0156	3.12e-06	6.89e-12	-6.86	-0.17	0.0645	0.00835	-2.64	-0.122	0.0238	3.37e-07	-5.1	-0.064	0.0289	0.0269	-2.21	-0.119	0.0332	0.000335	-3.59
-0.0898	0.0131	3.16e-06	6.98e-12	-6.86	-0.173	0.0507	0.000665	-3.4	-0.0825	0.0189	1.29e-05	-4.36	-0.0887	0.0261	0.000685	-3.4	-0.0813	0.0292	0.00527	-2.79
-0.0423	0.00618	3.22e-06	7.11e-12	-6.86	-0.0377	0.0229	0.1	-1.64	-0.0379	0.00943	5.97e-05	-4.01	-0.0337	0.0115	0.00325	-2.94	-0.0652	0.0135	1.46e-06	-4.82
0.0829	0.0121	3.23e-06	7.14e-12	6.85	0.0949	0.0443	0.0321	2.14	0.0805	0.0189	2.17e-05	4.25	0.0929	0.0222	2.84e-05	4.19	0.0699	0.0257	0.00657	2.72
-0.0441	0.00643	3.26e-06	7.19e-12	-6.85	-0.062	0.0261	0.0174	-2.38	-0.0426	0.0102	3.08e-05	-4.17	-0.0391	0.0118	0.000903	-3.32	-0.048	0.013	0.000216	-3.7
0.0478	0.00698	3.3e-06	7.3e-12	6.85	0.114	0.0318	0.00033	3.59	0.0427	0.0116	0.000245	3.67	0.0315	0.0121	0.00946	2.59	0.0636	0.0137	3.43e-06	4.64
-0.0804	0.0117	3.39e-06	7.48e-12	-6.85	-0.107	0.0453	0.0184	-2.36	-0.0669	0.0194	0.000567	-3.45	-0.0702	0.0213	0.000986	-3.29	-0.104	0.0228	5.33e-06	-4.55
-0.0638	0.00931	3.41e-06	7.53e-12	-6.85	-0.0825	0.0265	0.00186	-3.11	-0.0631	0.016	7.83e-05	-3.95	-0.0653	0.0167	8.91e-05	-3.92	-0.0524	0.0197	0.00776	-2.66
0.0506	0.00739	3.43e-06	7.57e-12	6.85	0.113	0.0266	2.32e-05	4.23	0.0498	0.0125	7.06e-05	3.97	0.0336	0.0126	0.00757	2.67	0.0563	0.0154	0.000247	3.67
-0.0738	0.0108	3.45e-06	7.63e-12	-6.85	-0.0457	0.0407	0.261	-1.12	-0.0672	0.0168	6.28e-05	-4	-0.101	0.0199	3.85e-07	-5.08	-0.0591	0.0228	0.00945	-2.6
0.062	0.00906	3.47e-06	7.67e-12	6.84	0.133	0.0367	0.00029	3.62	0.0763	0.0142	7.02e-08	5.39	0.0392	0.016	0.0142	2.45	0.0484	0.0199	0.015	2.43
-0.0706	0.0103	3.51e-06	7.75e-12	-6.84	-0.0696	0.0334	0.0371	-2.08	-0.0757	0.0171	9.55e-06	-4.43	-0.0691	0.0195	0.000381	-3.55	-0.0655	0.0203	0.00125	-3.23
-0.0404	0.00591	3.68e-06	8.13e-12	-6.84	-0.0558	0.0251	0.0262	-2.22	-0.0478	0.0088	5.63e-08	-5.43	-0.0366	0.0111	0.000929	-3.31	-0.0255	0.0129	0.0491	-1.97
-0.0441	0.00646	3.77e-06	8.32e-12	-6.83	-0.0544	0.0236	0.0211	-2.31	-0.0364	0.0105	0.000516	-3.47	-0.0475	0.0113	2.6e-05	-4.21	-0.0491	0.0138	0.000391	-3.55
0.0619	0.00906	3.95e-06	8.74e-12	6.83	0.102	0.0328	0.00196	3.1	0.0809	0.0139	5.67e-09	5.83	0.0387	0.0176	0.0281	2.2	0.0404	0.0188	0.0315	2.15
-0.0845	0.0124	4.3e-06	9.5e-12	-6.81	-0.172	0.0496	0.000514	-3.47	-0.0483	0.0191	0.0115	-2.53	-0.0732	0.0231	0.00152	-3.17	-0.142	0.026	4.85e-08	-5.46
-0.0408	0.00598	4.35e-06	9.62e-12	-6.81	-0.0816	0.0237	0.000565	-3.45	-0.0394	0.00934	2.41e-05	-4.22	-0.03	0.0108	0.00555	-2.77	-0.0463	0.0128	0.000286	-3.63
-0.0947	0.0139	4.36e-06	9.62e-12	-6.81	-0.229	0.068	0.000782	-3.36	-0.0733	0.0195	0.000172	-3.76	-0.103	0.0289	0.000367	-3.56	-0.11	0.0298	0.00021	-3.71
0.0596	0.00876	4.49e-06	9.92e-12	6.81	0.0897	0.0347	0.00964	2.59	0.079	0.0153	2.18e-07	5.18	0.0453	0.0156	0.00377	2.9	0.0465	0.0162	0.00406	2.87
-0.0845	0.0124	4.64e-06	1.03e-11	-6.8	-0.0998	0.0579	0.0848	-1.72	-0.0826	0.0192	1.77e-05	-4.29	-0.0631	0.0224	0.00479	-2.82	-0.113	0.0259	1.2e-05	-4.38
-0.052	0.00764	4.8e-06	1.06e-11	-6.8	-0.0504	0.0262	0.054	-1.93	-0.0361	0.0126	0.00418	-2.86	-0.051	0.0142	0.000333	-3.59	-0.0761	0.015	4.26e-07	-5.06
-0.0842	0.0124	5.07e-06	1.12e-11	-6.79	-0.168	0.0407	3.56e-05	-4.13	-0.0659	0.0195	0.000733	-3.38	-0.0757	0.023	0.000992	-3.29	-0.0942	0.027	0.000479	-3.49
-0.0446	0.00657	5.16e-06	1.14e-11	-6.79	-0.106	0.0331	0.00142	-3.19	-0.0249	0.00886	0.00485	-2.82	-0.0458	0.0134	0.000639	-3.41	-0.0916	0.0158	7.39e-09	-5.78
0.0611	0.00901	5.25e-06	1.16e-11	6.79	0.137	0.0395	0.000512	3.47	0.0606	0.015	5.6e-05	4.03	0.0616	0.0163	0.000159	3.78	0.0473	0.0169	0.00507	2.8
-0.0822	0.0121	5.28e-06	1.17e-11	-6.78	-0.144	0.0495	0.00366	-2.91	-0.0941	0.02	2.65e-06	-4.7	-0.058	0.0209	0.00543	-2.78	-0.0829	0.0249	0.000887	-3.32
-0.0357	0.00526	5.48e-06	1.21e-11	-6.78	-0.0643	0.0199	0.00123	-3.23	-0.036	0.00898	5.96e-05	-4.01	-0.0279	0.00955	0.0035	-2.92	-0.0366	0.00991	0.000224	-3.69
-0.0841	0.0124	6.23e-06	1.38e-11	-6.76	-0.0549	0.039	0.16	-1.41	-0.0849	0.0208	4.55e-05	-4.08	-0.0675	0.0234	0.00391	-2.89	-0.112	0.0244	4.18e-06	-4.6
0.0871	0.0129	6.34e-06	1.4e-11	6.76	0.0489	0.0501	0.329	0.976	0.093	0.0198	2.48e-06	4.71	0.105	0.0232	6.42e-06	4.51	0.0598	0.0287	0.0375	2.08
-0.0825	0.0122	6.38e-06	1.41e-11	-6.76	0.0296	0.0474	0.533	0.623	-0.0901	0.0201	7.22e-06	-4.49	-0.0825	0.0231	0.000352	-3.57	-0.0987	0.0229	1.62e-05	-4.31
0.0446	0.00661	6.57e-06	1.45e-11	6.75	0.0702	0.0289	0.015	2.43	0.0441	0.0108	4.67e-05	4.07	0.0236	0.012	0.0505	1.96	0.0635	0.0126	4.75e-07	5.04
0.0564	0.00835	6.6e-06	1.46e-11	6.75	0.124	0.0323	0.000134	3.82	0.0597	0.0147	4.76e-05	4.07	0.0491	0.0136	0.000324	3.6	0.0444	0.0172	0.00985	2.58
0.0678	0.0101	6.95e-06	1.53e-11	6.74	0.103	0.0361	0.00432	2.85	0.0609	0.017	0.000328	3.59	0.0621	0.0182	0.000654	3.41	0.0731	0.0195	0.000172	3.76
-0.0609	0.00904	7.22e-06	1.6e-11	-6.74	-0.133	0.0366	0.000286	-3.63	-0.0837	0.0146	9.96e-09	-5.73	-0.0267	0.0164	0.104	-1.62	-0.0502	0.018	0.00534	-2.79
-0.0944	0.014	7.38e-06	1.63e-11	-6.74	-0.116	0.0409	0.00465	-2.83	-0.182	0.0294	6.33e-10	-6.18	-0.0554	0.024	0.0212	-2.3	-0.0656	0.0249	0.00845	-2.63
-0.0986	0.0146	7.62e-06	1.68e-11	-6.73	-0.139	0.0571	0.0153	-2.43	-0.0992	0.0229	1.53e-05	-4.32	-0.0892	0.0277	0.0013	-3.22	-0.0976	0.0294	0.000919	-3.31
0.0687	0.0102	8.09e-06	1.79e-11	6.72	0.181	0.0408	8.65e-06	4.45	0.0831	0.0164	4.04e-07	5.07	0.022	0.0188	0.243	1.17	0.0729	0.0203	0.000318	3.6
0.305	0.0454	8.23e-06	1.82e-11	6.72	0.0513	0.195	0.792	0.263	0.348	0.0694	5.4e-07	5.01	0.343	0.0866	7.44e-05	3.96	0.244	0.0923	0.00824	2.64
0.076	0.0113	8.51e-06	1.88e-11	6.72	0.0378	0.0514	0.462	0.736	0.0896	0.0176	3.51e-07	5.09	0.0504	0.0207	0.0149	2.44	0.0927	0.0233	6.76e-05	3.98
-0.0987	0.0147	8.98e-06	1.98e-11	-6.71	0.00638	0.0546	0.907	0.117	-0.104	0.0247	2.49e-05	-4.22	-0.147	0.0275	8.36e-08	-5.36	-0.0698	0.0275	0.011	-2.54
0.0456	0.0068	9.28e-06	2.05e-11	6.7	0.089	0.0275	0.00124	3.23	0.0517	0.0115	7.59e-06	4.48	0.0315	0.0121	0.00926	2.6	0.0444	0.0129	0.000591	3.44
-0.0781	0.0117	9.29e-06	2.05e-11	-6.7	-0.137	0.0484	0.00461	-2.83	-0.0799	0.0191	2.83e-05	-4.19	-0.0499	0.0209	0.0169	-2.39	-0.0962	0.0229	2.72e-05	-4.2
-0.0326	0.00487	9.29e-06	2.05e-11	-6.7	-0.0473	0.022	0.0317	-2.15	-0.0274	0.00744	0.000229	-3.69	-0.0323	0.00926	0.000486	-3.49	-0.039	0.00978	6.61e-05	-3.99
-0.096	0.0143	9.59e-06	2.12e-11	-6.7	-0.181	0.0642	0.00486	-2.82	-0.108	0.0203	9.87e-08	-5.33	-0.0652	0.0287	0.023	-2.27	-0.0834	0.0321	0.0093	-2.6
0.0642	0.00959	9.8e-06	2.16e-11	6.69	0.113	0.0337	0.000824	3.34	0.0835	0.0167	6.04e-07	4.99	0.0376	0.0169	0.0259	2.23	0.058	0.0186	0.00178	3.13
-0.101	0.0151	1.05e-05	2.32e-11	-6.68	-0.0269	0.0509	0.597	-0.529	-0.0859	0.0273	0.00167	-3.14	-0.126	0.027	2.89e-06	-4.68	-0.112	0.0278	6.08e-05	-4.01
0.0567	0.00848	1.06e-05	2.34e-11	6.68	0.0842	0.034	0.0134	2.47	0.0711	0.014	3.99e-07	5.07	0.0336	0.0159	0.0342	2.12	0.0552	0.0158	0.000482	3.49
-0.115	0.0172	1.06e-05	2.35e-11	-6.68	-0.144	0.0942	0.127	-1.53	-0.0831	0.0243	0.000615	-3.42	-0.158	0.0323	9.46e-07	-4.9	-0.13	0.0404	0.00132	-3.21
-0.0514	0.00769	1.07e-05	2.37e-11	-6.68	-0.0744	0.0284	0.00887	-2.62	-0.0396	0.0139	0.00424	-2.86	-0.0473	0.0137	0.00055	-3.46	-0.062	0.014	8.96e-06	-4.44
0.0774	0.0116	1.07e-05	2.37e-11	6.68	0.206	0.0482	1.83e-05	4.28	0.0683	0.0178	0.00013	3.83	0.0246	0.0227	0.279	1.08	0.116	0.0226	3.12e-07	5.12
-0.0396	0.00592	1.09e-05	2.41e-11	-6.68	-0.0109	0.0182	0.547	-0.602	-0.0399	0.0112	0.000372	-3.56	-0.0537	0.0109	9.1e-07	-4.91	-0.0358	0.0105	0.000613	-3.43
-0.163	0.0244	1.1e-05	2.44e-11	-6.68	-0.253	0.0912	0.00556	-2.77	-0.124	0.0382	0.00115	-3.25	-0.139	0.0468	0.00309	-2.96	-0.227	0.0489	3.44e-06	-4.64
0.0545	0.00816	1.11e-05	2.44e-11	6.68	0.0944	0.0309	0.00226	3.05	0.0654	0.0137	1.86e-06	4.77	0.0298	0.0137	0.0297	2.17	0.0638	0.0173	0.000224	3.69
-0.0572	0.00857	1.11e-05	2.45e-11	-6.68	-0.0633	0.031	0.0413	-2.04	-0.0481	0.0134	0.000326	-3.59	-0.0505	0.0172	0.00331	-2.94	-0.0761	0.0167	5.07e-06	-4.56
-0.0863	0.0129	1.11e-05	2.45e-11	-6.68	-0.0844	0.0507	0.0958	-1.67	-0.0871	0.0209	3.07e-05	-4.17	-0.097	0.0249	9.8e-05	-3.9	-0.0755	0.0243	0.00191	-3.1
-0.0503	0.00754	1.12e-05	2.47e-11	-6.68	-0.0395	0.0257	0.124	-1.54	-0.037	0.0133	0.00531	-2.79	-0.0697	0.0151	3.69e-06	-4.63	-0.0515	0.0129	6.84e-05	-3.98
-0.0975	0.0146	1.14e-05	2.51e-11	-6.67	-0.133	0.0512	0.00959	-2.59	-0.0948	0.0266	0.000364	-3.56	-0.123	0.0276	8.36e-06	-4.46	-0.0702	0.0252	0.00534	-2.79
-0.0475	0.00712	1.18e-05	2.61e-11	-6.67	-0.0655	0.0268	0.0144	-2.45	-0.0191	0.011	0.0837	-1.73	-0.0564	0.0133	2.32e-05	-4.23	-0.0827	0.0149	3.12e-08	-5.53
-0.0567	0.0085	1.19e-05	2.62e-11	-6.67	-0.0304	0.0309	0.325	-0.984	-0.0566	0.0128	9.17e-06	-4.44	-0.0645	0.0158	4.27e-05	-4.09	-0.0554	0.0195	0.00462	-2.83
0.0653	0.0098	1.25e-05	2.76e-11	6.66	0.15	0.0371	5.5e-05	4.03	0.0689	0.0171	5.33e-05	4.04	0.0414	0.0185	0.0256	2.23	0.064	0.0173	0.000221	3.69
-0.118	0.0177	1.25e-05	2.76e-11	-6.66	-0.123	0.0597	0.04	-2.05	-0.142	0.0313	5.21e-06	-4.56	-0.0995	0.031	0.00133	-3.21	-0.11	0.0346	0.00149	-3.18
-0.0671	0.0101	1.29e-05	2.85e-11	-6.65	-0.151	0.042	0.000337	-3.58	-0.0469	0.0161	0.00371	-2.9	-0.0617	0.0176	0.000458	-3.5	-0.0889	0.0213	3.05e-05	-4.17
0.0481	0.00723	1.32e-05	2.92e-11	6.65	0.0502	0.0269	0.0616	1.87	0.0701	0.0131	9.31e-08	5.34	0.042	0.0123	0.000628	3.42	0.031	0.0137	0.0234	2.27
-0.0476	0.00716	1.35e-05	2.98e-11	-6.65	-0.0619	0.0278	0.026	-2.23	-0.0365	0.011	0.000866	-3.33	-0.051	0.0134	0.000137	-3.81	-0.0606	0.0153	7.49e-05	-3.96
0.0654	0.00984	1.35e-05	2.98e-11	6.65	0.0718	0.0492	0.145	1.46	0.0725	0.0176	3.7e-05	4.13	0.0497	0.0157	0.00152	3.17	0.0802	0.0196	4.26e-05	4.09
0.0569	0.00857	1.39e-05	3.08e-11	6.64	0.119	0.035	0.000673	3.4	0.0684	0.0132	2.07e-07	5.19	0.0358	0.0158	0.0233	2.27	0.0463	0.0182	0.0109	2.55
-0.0526	0.00793	1.49e-05	3.29e-11	-6.63	-0.0673	0.0274	0.0139	-2.46	-0.0479	0.0128	0.000194	-3.73	-0.0432	0.0147	0.00327	-2.94	-0.0663	0.0161	3.81e-05	-4.12
0.0995	0.015	1.52e-05	3.35e-11	6.63	0.159	0.0602	0.00819	2.64	0.11	0.0225	1.1e-06	4.87	0.0826	0.0282	0.00346	2.92	0.083	0.0326	0.0109	2.55
-0.0814	0.0123	1.55e-05	3.43e-11	-6.63	-0.121	0.0392	0.002	-3.09	-0.0993	0.0229	1.39e-05	-4.35	-0.0539	0.0225	0.0164	-2.4	-0.0788	0.0219	0.000331	-3.59
-0.0548	0.00827	1.58e-05	3.48e-11	-6.62	-0.0765	0.0345	0.0267	-2.22	-0.0618	0.0134	4.07e-06	-4.61	-0.0479	0.0148	0.00122	-3.23	-0.0477	0.0165	0.00385	-2.89
-0.0526	0.00795	1.66e-05	3.66e-11	-6.62	-0.0494	0.0241	0.0402	-2.05	-0.0631	0.0153	3.58e-05	-4.13	-0.0511	0.0138	0.000217	-3.7	-0.0456	0.0148	0.002	-3.09
0.0574	0.00867	1.68e-05	3.72e-11	6.61	0.115	0.032	0.000336	3.59	0.0794	0.0149	9.79e-08	5.33	0.0257	0.0155	0.0972	1.66	0.0508	0.0165	0.00211	3.07
-0.0489	0.00739	1.69e-05	3.72e-11	-6.61	-0.112	0.0294	0.000139	-3.81	-0.0112	0.0119	0.344	-0.947	-0.0546	0.0128	1.87e-05	-4.28	-0.0899	0.016	2.01e-08	-5.61
0.0816	0.0123	1.73e-05	3.83e-11	6.61	0.0458	0.0438	0.296	1.04	0.0975	0.0199	1.02e-06	4.89	0.0551	0.024	0.0217	2.3	0.0955	0.0236	5.38e-05	4.04
0.0505	0.00763	1.73e-05	3.83e-11	6.61	0.0134	0.0302	0.657	0.444	0.0551	0.0131	2.41e-05	4.22	0.0633	0.0139	4.84e-06	4.57	0.0397	0.0142	0.0051	2.8
0.054	0.00817	1.83e-05	4.03e-11	6.6	0.0985	0.027	0.000264	3.65	0.0572	0.0144	6.8e-05	3.98	0.0354	0.0139	0.0105	2.56	0.0596	0.0168	0.000396	3.54
0.0512	0.00776	1.88e-05	4.16e-11	6.6	0.135	0.0307	1.07e-05	4.4	0.0519	0.0126	3.96e-05	4.11	0.0217	0.0136	0.11	1.6	0.0684	0.0161	2.2e-05	4.24
-0.0656	0.00994	1.9e-05	4.2e-11	-6.6	-0.1	0.0325	0.00203	-3.09	-0.0554	0.0196	0.00464	-2.83	-0.0485	0.0167	0.00356	-2.91	-0.0841	0.0184	4.72e-06	-4.58
0.0415	0.00629	1.9e-05	4.21e-11	6.6	0.0582	0.0227	0.0105	2.56	0.0506	0.0104	1.17e-06	4.86	0.031	0.0116	0.00746	2.68	0.0357	0.0122	0.0035	2.92
0.0672	0.0102	1.97e-05	4.35e-11	6.59	0.19	0.0412	3.84e-06	4.62	0.0798	0.018	9.46e-06	4.43	0.0267	0.0185	0.149	1.44	0.0694	0.0182	0.000132	3.82
-0.0536	0.00812	1.97e-05	4.36e-11	-6.59	-0.0733	0.031	0.0181	-2.36	-0.0507	0.0133	0.000133	-3.82	-0.0467	0.0141	0.000896	-3.32	-0.0626	0.0172	0.000282	-3.63
-0.0569	0.00863	2e-05	4.41e-11	-6.59	-0.066	0.0234	0.00476	-2.82	-0.0832	0.0194	1.84e-05	-4.28	-0.0526	0.0158	0.000891	-3.32	-0.0429	0.0142	0.00255	-3.02
-0.0765	0.0116	2e-05	4.42e-11	-6.59	-0.0957	0.0405	0.018	-2.36	-0.0747	0.0184	4.83e-05	-4.06	-0.0903	0.0204	9.53e-06	-4.43	-0.0492	0.0264	0.0623	-1.86
0.0614	0.00932	2.01e-05	4.45e-11	6.59	0.0718	0.0323	0.0264	2.22	0.0563	0.0183	0.0021	3.08	0.0657	0.0163	5.59e-05	4.03	0.0585	0.0162	0.000302	3.61
0.0767	0.0116	2.01e-05	4.45e-11	6.59	0.138	0.0383	0.000305	3.61	0.0867	0.0219	7.32e-05	3.97	0.0522	0.0205	0.0108	2.55	0.0746	0.0212	0.000433	3.52
-0.088	0.0134	2.07e-05	4.56e-11	-6.58	-0.0545	0.0446	0.221	-1.22	-0.0785	0.0215	0.000257	-3.66	-0.0869	0.0238	0.000262	-3.65	-0.122	0.0293	3.25e-05	-4.15
-0.0849	0.0129	2.14e-05	4.73e-11	-6.58	-0.132	0.0534	0.0137	-2.46	-0.0789	0.0186	2.21e-05	-4.24	-0.0734	0.0252	0.00355	-2.92	-0.101	0.0291	0.000502	-3.48
-0.0465	0.00707	2.15e-05	4.74e-11	-6.58	-0.0503	0.0288	0.081	-1.74	-0.0327	0.0111	0.00324	-2.94	-0.0473	0.0127	0.000192	-3.73	-0.0698	0.015	3.27e-06	-4.65
0.0786	0.0119	2.15e-05	4.74e-11	6.58	0.147	0.0449	0.00111	3.26	0.0829	0.0209	7.27e-05	3.97	0.0656	0.0215	0.00227	3.05	0.0711	0.0221	0.00126	3.22
0.0593	0.00901	2.16e-05	4.76e-11	6.58	0.0783	0.0334	0.0191	2.34	0.061	0.0185	0.001	3.29	0.0439	0.0158	0.00547	2.78	0.068	0.0149	4.91e-06	4.57
-0.0782	0.0119	2.25e-05	4.98e-11	-6.57	-0.147	0.0435	0.000747	-3.37	-0.0714	0.0178	6.29e-05	-4	-0.0457	0.0239	0.0555	-1.92	-0.104	0.0248	2.56e-05	-4.21
-0.104	0.0158	2.33e-05	5.14e-11	-6.57	-0.0687	0.0619	0.266	-1.11	-0.0879	0.0253	0.000521	-3.47	-0.133	0.0285	2.81e-06	-4.68	-0.1	0.0322	0.00184	-3.12
-0.0307	0.00467	2.37e-05	5.24e-11	-6.56	-0.0228	0.0168	0.177	-1.35	-0.0373	0.00881	2.33e-05	-4.23	-0.0286	0.00819	0.000474	-3.5	-0.0288	0.00831	0.000521	-3.47
-0.0767	0.0117	2.39e-05	5.29e-11	-6.56	-0.13	0.0342	0.000137	-3.81	-0.102	0.0224	4.67e-06	-4.58	-0.041	0.0208	0.0483	-1.97	-0.0698	0.0215	0.0012	-3.24
0.07	0.0107	2.47e-05	5.45e-11	6.56	0.079	0.0417	0.0579	1.9	0.0667	0.0167	6.29e-05	4	0.0714	0.0195	0.000261	3.65	0.0713	0.0224	0.00144	3.19
-0.0503	0.00767	2.5e-05	5.52e-11	-6.56	-0.036	0.0314	0.251	-1.15	-0.0502	0.0126	6.72e-05	-3.99	-0.0595	0.014	2.05e-05	-4.26	-0.0432	0.0148	0.00353	-2.92
-0.0766	0.0117	2.56e-05	5.65e-11	-6.55	-0.0967	0.0438	0.0272	-2.21	-0.0895	0.0194	3.87e-06	-4.62	-0.0549	0.0214	0.0104	-2.56	-0.0779	0.0226	0.000577	-3.44
-0.093	0.0142	2.68e-05	5.92e-11	-6.55	-0.168	0.0479	0.000461	-3.5	-0.107	0.0259	3.41e-05	-4.14	-0.0576	0.0263	0.0284	-2.19	-0.0914	0.0252	0.000285	-3.63
-0.049	0.0075	2.73e-05	6.04e-11	-6.54	-0.0817	0.029	0.00479	-2.82	-0.0365	0.0132	0.00576	-2.76	-0.0444	0.013	0.00065	-3.41	-0.0611	0.0142	1.6e-05	-4.31
-0.061	0.00933	2.74e-05	6.06e-11	-6.54	-0.072	0.0284	0.0112	-2.54	-0.0709	0.0151	2.76e-06	-4.69	-0.05	0.017	0.00331	-2.94	-0.0532	0.0202	0.00855	-2.63
-0.091	0.0139	2.76e-05	6.09e-11	-6.54	-0.0386	0.0494	0.435	-0.781	-0.1	0.025	6.56e-05	-3.99	-0.1	0.0251	6.5e-05	-3.99	-0.0861	0.0252	0.000617	-3.42
0.1	0.0153	2.78e-05	6.14e-11	6.54	0.123	0.0521	0.0185	2.36	0.109	0.0271	5.63e-05	4.03	0.0889	0.0284	0.00173	3.13	0.0945	0.0276	0.000629	3.42
0.137	0.021	2.89e-05	6.38e-11	6.53	0.0663	0.0879	0.451	0.754	0.141	0.0318	8.68e-06	4.45	0.141	0.0398	0.000386	3.55	0.141	0.0436	0.00124	3.23
0.0826	0.0126	2.91e-05	6.43e-11	6.53	0.0291	0.0459	0.526	0.634	0.0969	0.021	4.12e-06	4.61	0.056	0.0229	0.0145	2.44	0.11	0.0249	1.01e-05	4.41
-0.0804	0.0123	2.97e-05	6.56e-11	-6.53	-0.122	0.0421	0.00377	-2.9	-0.0615	0.0199	0.00199	-3.09	-0.0788	0.0223	0.000402	-3.54	-0.0991	0.026	0.000134	-3.82
-0.0487	0.00747	3.06e-05	6.76e-11	-6.53	-0.0716	0.028	0.0105	-2.56	-0.0456	0.0131	0.000486	-3.49	-0.039	0.0132	0.00323	-2.95	-0.0575	0.014	4.03e-05	-4.11
-0.0589	0.00903	3.09e-05	6.83e-11	-6.52	-0.00113	0.0331	0.973	-0.0342	-0.0496	0.0146	0.000664	-3.4	-0.0878	0.0175	5.44e-07	-5.01	-0.0597	0.0172	0.000517	-3.47
-0.0599	0.00918	3.1e-05	6.84e-11	-6.52	-0.148	0.0447	0.000902	-3.32	-0.0413	0.014	0.00315	-2.95	-0.0289	0.0168	0.0846	-1.72	-0.119	0.0192	5.67e-10	-6.2
-0.0781	0.012	3.1e-05	6.85e-11	-6.52	-0.106	0.0393	0.00705	-2.69	-0.0352	0.0204	0.0842	-1.73	-0.104	0.0223	3.01e-06	-4.67	-0.0955	0.0229	3.06e-05	-4.17
0.0541	0.00829	3.12e-05	6.89e-11	6.52	0.118	0.0352	0.000796	3.35	0.0465	0.0139	0.000817	3.35	0.0496	0.0143	0.000516	3.47	0.0566	0.0165	0.000603	3.43
-0.0672	0.0103	3.17e-05	7.01e-11	-6.52	-0.184	0.0415	8.94e-06	-4.44	-0.0688	0.0151	5.41e-06	-4.55	-0.0318	0.0196	0.104	-1.62	-0.0766	0.0232	0.000969	-3.3
-0.0894	0.0137	3.38e-05	7.47e-11	-6.51	-0.0725	0.0459	0.114	-1.58	-0.14	0.0252	3.21e-08	-5.53	-0.0849	0.0247	0.00059	-3.44	-0.0503	0.0248	0.0425	-2.03
-0.0555	0.00853	3.43e-05	7.58e-11	-6.51	-0.0356	0.0317	0.261	-1.12	-0.0442	0.0147	0.00259	-3.01	-0.0586	0.0155	0.000157	-3.78	-0.0706	0.0159	9.21e-06	-4.43
-0.0555	0.00853	3.53e-05	7.79e-11	-6.5	-0.134	0.0361	0.000199	-3.72	-0.0749	0.0134	2.07e-08	-5.61	-0.00848	0.0159	0.595	-0.532	-0.0601	0.017	0.000426	-3.52
0.0762	0.0117	3.61e-05	7.98e-11	6.5	0.178	0.0403	1.04e-05	4.41	0.0952	0.0195	1.01e-06	4.89	0.0419	0.0205	0.0416	2.04	0.0573	0.0246	0.0195	2.33
0.0484	0.00745	3.62e-05	7.99e-11	6.5	0.119	0.0255	2.9e-06	4.68	0.037	0.0148	0.0125	2.5	0.0406	0.0129	0.00168	3.14	0.0468	0.013	0.000318	3.6
0.0576	0.00886	3.63e-05	8.03e-11	6.5	0.0618	0.0308	0.0451	2	0.0482	0.0156	0.002	3.09	0.0688	0.0149	3.82e-06	4.62	0.0522	0.018	0.00381	2.89
0.0607	0.00934	3.7e-05	8.17e-11	6.5	0.141	0.0371	0.000153	3.79	0.0573	0.015	0.000133	3.82	0.0532	0.0159	0.000827	3.34	0.055	0.0207	0.00779	2.66
0.0782	0.012	3.75e-05	8.28e-11	6.5	0.104	0.0437	0.0173	2.38	0.0921	0.02	4.2e-06	4.6	0.07	0.0229	0.00225	3.06	0.0616	0.0225	0.00613	2.74
0.0843	0.013	3.8e-05	8.4e-11	6.49	0.0925	0.0381	0.0152	2.43	0.156	0.0282	2.97e-08	5.54	0.0587	0.023	0.0107	2.55	0.0615	0.0218	0.00484	2.82
0.126	0.0194	3.91e-05	8.65e-11	6.49	0.167	0.0711	0.0192	2.34	0.167	0.0322	2.09e-07	5.19	0.11	0.0368	0.0028	2.99	0.0783	0.0366	0.0323	2.14
0.0674	0.0104	4.03e-05	8.89e-11	6.48	0.123	0.0343	0.000333	3.59	0.0705	0.0179	8.5e-05	3.93	0.0465	0.0183	0.0112	2.54	0.0696	0.0207	0.000784	3.36
0.141	0.0217	4.05e-05	8.96e-11	6.48	0.0823	0.0861	0.339	0.956	0.131	0.0337	0.000107	3.87	0.173	0.0413	2.67e-05	4.2	0.136	0.0437	0.00188	3.11
0.0619	0.00956	4.17e-05	9.21e-11	6.48	0.123	0.0364	0.000714	3.38	0.0819	0.0152	6.91e-08	5.39	0.0311	0.0173	0.072	1.8	0.0501	0.02	0.012	2.51
-0.0422	0.00652	4.28e-05	9.45e-11	-6.48	-0.0484	0.0199	0.0147	-2.44	-0.0485	0.012	5.26e-05	-4.04	-0.0339	0.0121	0.00509	-2.8	-0.0419	0.0118	0.00038	-3.55
-0.0481	0.00742	4.32e-05	9.54e-11	-6.47	-0.0318	0.0315	0.312	-1.01	-0.0328	0.0116	0.00485	-2.82	-0.0496	0.013	0.000128	-3.83	-0.0794	0.0162	9.56e-07	-4.9
0.0479	0.00741	4.4e-05	9.71e-11	6.47	0.0392	0.0253	0.122	1.55	0.0672	0.0131	3.16e-07	5.11	0.0303	0.0131	0.021	2.31	0.0489	0.0141	0.000504	3.48
-0.0465	0.00719	4.4e-05	9.73e-11	-6.47	-0.106	0.0277	0.000134	-3.82	-0.0506	0.012	2.47e-05	-4.22	-0.0371	0.0123	0.00258	-3.01	-0.0369	0.0149	0.0133	-2.48
-0.0638	0.00987	4.56e-05	1.01e-10	-6.47	-0.0675	0.0373	0.0706	-1.81	-0.0473	0.0168	0.00485	-2.82	-0.0633	0.0167	0.000155	-3.78	-0.0876	0.0203	1.57e-05	-4.32
-0.0609	0.00942	4.65e-05	1.03e-10	-6.46	-0.0664	0.0295	0.0245	-2.25	-0.0563	0.0185	0.00237	-3.04	-0.0474	0.0163	0.00368	-2.9	-0.0778	0.0171	5.11e-06	-4.56
-0.0586	0.00907	4.66e-05	1.03e-10	-6.46	-0.0665	0.0272	0.0145	-2.45	-0.0716	0.017	2.52e-05	-4.21	-0.0754	0.0169	8.62e-06	-4.45	-0.0291	0.0161	0.0712	-1.8
0.0716	0.0111	4.74e-05	1.05e-10	6.46	0.193	0.0406	2.06e-06	4.75	0.0853	0.0184	3.54e-06	4.64	0.0399	0.0214	0.0622	1.87	0.0528	0.0204	0.0096	2.59
0.0543	0.00843	5.36e-05	1.18e-10	6.44	0.0682	0.029	0.0187	2.35	0.0644	0.0151	1.99e-05	4.27	0.0387	0.0153	0.0117	2.52	0.0556	0.0154	0.00029	3.62
-0.0533	0.00828	5.63e-05	1.24e-10	-6.43	-0.086	0.0265	0.00117	-3.25	-0.0159	0.0178	0.372	-0.893	-0.0561	0.0143	9.37e-05	-3.91	-0.0644	0.0139	3.72e-06	-4.63
-0.095	0.0148	6.19e-05	1.37e-10	-6.42	-0.144	0.0444	0.00118	-3.24	-0.118	0.0268	1.1e-05	-4.4	-0.0622	0.0269	0.0209	-2.31	-0.0861	0.0279	0.00201	-3.09
-0.0613	0.00955	6.44e-05	1.42e-10	-6.41	-0.0693	0.0321	0.0309	-2.16	-0.0474	0.0145	0.00109	-3.27	-0.0586	0.0192	0.00224	-3.06	-0.0872	0.0199	1.21e-05	-4.38
0.0797	0.0124	6.5e-05	1.44e-10	6.41	0.099	0.0429	0.0211	2.31	0.108	0.0219	8.81e-07	4.92	0.0618	0.0219	0.00467	2.83	0.0618	0.0239	0.00974	2.58
0.0681	0.0106	6.5e-05	1.44e-10	6.41	0.11	0.0394	0.00524	2.79	0.0565	0.0173	0.00108	3.27	0.0694	0.019	0.000271	3.64	0.0721	0.0218	0.000917	3.31
-0.0754	0.0118	6.51e-05	1.44e-10	-6.41	-0.0976	0.043	0.0232	-2.27	-0.0362	0.0182	0.0464	-1.99	-0.107	0.0226	2.28e-06	-4.73	-0.102	0.0242	2.59e-05	-4.21
-0.0707	0.011	6.73e-05	1.49e-10	-6.41	-0.101	0.0443	0.0223	-2.28	-0.0973	0.0192	3.85e-07	-5.08	-0.0533	0.0194	0.00593	-2.75	-0.0528	0.0208	0.0112	-2.54
0.0494	0.00771	6.75e-05	1.49e-10	6.41	0.037	0.0254	0.146	1.45	0.0738	0.0147	4.71e-07	5.04	0.0445	0.0135	0.00101	3.29	0.0362	0.0139	0.00921	2.6
-0.0509	0.00795	6.75e-05	1.49e-10	-6.41	-0.0226	0.0297	0.446	-0.762	-0.0442	0.014	0.00154	-3.17	-0.0527	0.0139	0.000149	-3.79	-0.064	0.0151	2.28e-05	-4.24
-0.0403	0.00628	6.75e-05	1.49e-10	-6.41	-0.0607	0.0253	0.0163	-2.4	-0.0237	0.0107	0.0262	-2.22	-0.0455	0.0109	3.19e-05	-4.16	-0.0507	0.0123	3.68e-05	-4.13
0.0785	0.0123	6.78e-05	1.5e-10	6.41	0.0615	0.0468	0.189	1.31	0.0695	0.0195	0.000368	3.56	0.0988	0.0231	1.91e-05	4.28	0.0746	0.0242	0.00208	3.08
-0.0859	0.0134	7.13e-05	1.57e-10	-6.4	-0.158	0.0588	0.00711	-2.69	-0.0572	0.0179	0.0014	-3.19	-0.096	0.028	0.000614	-3.43	-0.15	0.034	9.91e-06	-4.42
-0.0646	0.0101	7.13e-05	1.57e-10	-6.4	-0.0643	0.0421	0.127	-1.53	-0.0749	0.0167	7.43e-06	-4.48	-0.048	0.018	0.00774	-2.66	-0.0703	0.0197	0.000355	-3.57
0.08	0.0125	7.21e-05	1.59e-10	6.4	0.111	0.0408	0.00663	2.72	0.108	0.021	3.07e-07	5.12	0.0509	0.0226	0.0243	2.25	0.0647	0.0252	0.0103	2.56
0.071	0.0111	7.25e-05	1.6e-10	6.4	0.139	0.043	0.00124	3.23	0.0714	0.0193	0.000212	3.7	0.052	0.0202	0.0102	2.57	0.0747	0.0203	0.000232	3.68
0.101	0.0158	7.31e-05	1.61e-10	6.39	0.0914	0.0532	0.0858	1.72	0.111	0.0269	3.58e-05	4.13	0.0996	0.029	0.000596	3.43	0.0916	0.03	0.00224	3.06
0.0801	0.0125	7.46e-05	1.65e-10	6.39	0.0782	0.043	0.069	1.82	0.0742	0.0216	0.000579	3.44	0.0602	0.0231	0.00931	2.6	0.108	0.0235	4.18e-06	4.6
-0.0709	0.0111	7.54e-05	1.67e-10	-6.39	-0.126	0.0465	0.00659	-2.72	-0.057	0.0177	0.00127	-3.22	-0.0746	0.0191	9.47e-05	-3.9	-0.076	0.0241	0.00162	-3.15
-0.061	0.00955	7.57e-05	1.67e-10	-6.39	-0.0583	0.0382	0.127	-1.53	-0.0864	0.016	6.46e-08	-5.41	-0.0359	0.0162	0.0267	-2.22	-0.0602	0.0197	0.0023	-3.05
-0.104	0.0162	7.78e-05	1.72e-10	-6.38	-0.097	0.0538	0.0716	-1.8	-0.0783	0.0278	0.00477	-2.82	-0.0946	0.0302	0.00172	-3.13	-0.147	0.0309	1.97e-06	-4.76
0.0457	0.00717	7.79e-05	1.72e-10	6.38	0.0483	0.0295	0.102	1.63	0.041	0.0124	0.000934	3.31	0.0403	0.0125	0.00127	3.22	0.0573	0.0136	2.44e-05	4.22
0.0484	0.00758	7.81e-05	1.73e-10	6.38	0.0566	0.0285	0.047	1.99	0.0663	0.0132	4.72e-07	5.04	0.0368	0.0139	0.00836	2.64	0.0381	0.0138	0.00564	2.77
-0.0598	0.00938	7.9e-05	1.75e-10	-6.38	-0.116	0.0377	0.00219	-3.06	-0.0551	0.0149	0.000222	-3.69	-0.051	0.017	0.00264	-3.01	-0.0647	0.0192	0.000778	-3.36
0.112	0.0176	7.92e-05	1.75e-10	6.38	0.0614	0.0651	0.345	0.944	0.0917	0.0282	0.00114	3.25	0.159	0.0342	3.37e-06	4.65	0.11	0.0336	0.0011	3.26
-0.0578	0.00907	7.99e-05	1.77e-10	-6.38	-0.111	0.0342	0.00121	-3.24	-0.0681	0.0153	8.2e-06	-4.46	-0.034	0.0152	0.0253	-2.24	-0.063	0.0192	0.00106	-3.27
-0.0688	0.0108	8e-05	1.77e-10	-6.38	-0.101	0.0375	0.00713	-2.69	-0.096	0.0183	1.56e-07	-5.25	-0.0451	0.0188	0.0163	-2.4	-0.051	0.022	0.0206	-2.32
-0.101	0.0158	8.16e-05	1.8e-10	-6.38	-0.177	0.0596	0.00296	-2.97	-0.0861	0.0269	0.00138	-3.2	-0.0704	0.0259	0.00665	-2.71	-0.15	0.0338	9.26e-06	-4.43
-0.0776	0.0122	8.26e-05	1.83e-10	-6.38	-0.145	0.0451	0.00129	-3.22	-0.0773	0.0175	9.96e-06	-4.42	-0.0497	0.0248	0.0448	-2.01	-0.0877	0.0272	0.00126	-3.22
-0.0288	0.00451	8.32e-05	1.84e-10	-6.37	-0.017	0.0183	0.354	-0.927	-0.0326	0.00771	2.38e-05	-4.23	-0.0287	0.0078	0.000235	-3.68	-0.0267	0.00883	0.00255	-3.02
0.07	0.011	8.68e-05	1.92e-10	6.37	0.0553	0.0372	0.137	1.49	0.0903	0.0189	1.82e-06	4.77	0.053	0.0209	0.0114	2.53	0.067	0.0201	0.000845	3.34
-0.0664	0.0104	8.74e-05	1.93e-10	-6.37	-0.0721	0.0414	0.0814	-1.74	-0.0632	0.0163	0.000104	-3.88	-0.0559	0.0187	0.00274	-3	-0.086	0.0225	0.000134	-3.82
0.0567	0.00891	8.8e-05	1.94e-10	6.37	0.123	0.0357	0.000599	3.43	0.0627	0.0157	6.29e-05	4	0.041	0.0155	0.00818	2.64	0.0537	0.0167	0.0013	3.22
0.0451	0.00708	8.91e-05	1.97e-10	6.36	0.0985	0.0261	0.000162	3.77	0.0571	0.0118	1.4e-06	4.83	0.0215	0.0128	0.0937	1.68	0.041	0.0138	0.00294	2.97
-0.1	0.0157	8.92e-05	1.97e-10	-6.36	0.0215	0.0546	0.693	0.394	-0.101	0.0258	9.64e-05	-3.9	-0.0833	0.0288	0.0038	-2.89	-0.161	0.0317	4e-07	-5.07
0.0752	0.0118	9.03e-05	1.99e-10	6.36	0.063	0.0452	0.164	1.39	0.0796	0.0196	4.86e-05	4.06	0.0621	0.0212	0.00338	2.93	0.0881	0.0233	0.00016	3.78
-0.0567	0.00891	9.04e-05	2e-10	-6.36	-0.015	0.029	0.605	-0.518	-0.0417	0.0141	0.00313	-2.95	-0.0737	0.0182	5.33e-05	-4.04	-0.0784	0.0172	5.11e-06	-4.56
-0.0572	0.00899	9.07e-05	2e-10	-6.36	-0.0513	0.0335	0.126	-1.53	-0.0699	0.0143	9.23e-07	-4.91	-0.0511	0.0167	0.00221	-3.06	-0.0452	0.0183	0.0138	-2.46
0.0342	0.00537	9.12e-05	2.01e-10	6.36	0.0318	0.0195	0.103	1.63	0.0376	0.00875	1.75e-05	4.29	0.0365	0.0105	0.000488	3.49	0.0281	0.0101	0.00533	2.79
0.0729	0.0115	9.32e-05	2.06e-10	6.36	0.175	0.0483	0.000299	3.62	0.0755	0.018	2.68e-05	4.2	0.0474	0.0215	0.0278	2.2	0.0745	0.0228	0.00106	3.28
0.0584	0.00919	9.36e-05	2.07e-10	6.36	0.0925	0.0369	0.0123	2.5	0.0779	0.0148	1.51e-07	5.25	0.0302	0.0158	0.0554	1.92	0.0584	0.0198	0.00326	2.94
0.0507	0.00798	9.49e-05	2.1e-10	6.35	0.0467	0.031	0.132	1.51	0.0678	0.0127	8.38e-08	5.36	0.0554	0.0147	0.000164	3.77	0.0179	0.0162	0.27	1.1
0.077	0.0121	9.74e-05	2.15e-10	6.35	0.168	0.0425	8e-05	3.94	0.0581	0.0222	0.00869	2.62	0.0602	0.0209	0.00396	2.88	0.091	0.0228	6.77e-05	3.98
-0.0358	0.00565	9.97e-05	2.2e-10	-6.35	-0.0624	0.0206	0.0024	-3.04	-0.0295	0.00911	0.00118	-3.24	-0.0305	0.0101	0.00258	-3.01	-0.0448	0.0118	0.000143	-3.8
-0.105	0.0165	9.99e-05	2.21e-10	-6.35	-0.0488	0.0513	0.342	-0.95	-0.0899	0.0278	0.00121	-3.24	-0.119	0.0309	0.000114	-3.86	-0.13	0.0322	5.3e-05	-4.04
0.0954	0.015	0.000103	2.28e-10	6.34	0.109	0.0429	0.0109	2.55	0.114	0.0256	9.14e-06	4.44	0.0726	0.0276	0.00839	2.64	0.0904	0.0312	0.00374	2.9
0.0964	0.0152	0.000105	2.31e-10	6.34	0.114	0.0508	0.0254	2.24	0.122	0.0262	2.85e-06	4.68	0.0917	0.0278	0.000958	3.3	0.0636	0.0291	0.029	2.18
-0.0823	0.013	0.000105	2.33e-10	-6.34	-0.0754	0.0506	0.136	-1.49	-0.0672	0.021	0.00133	-3.21	-0.0757	0.024	0.00159	-3.16	-0.114	0.0257	8.36e-06	-4.46
-0.0865	0.0137	0.000107	2.37e-10	-6.34	-0.073	0.0472	0.122	-1.55	-0.0968	0.0238	4.79e-05	-4.07	-0.0796	0.0255	0.00178	-3.12	-0.0856	0.0249	0.000594	-3.43
-0.0725	0.0115	0.000109	2.4e-10	-6.33	-0.0776	0.0364	0.0327	-2.14	-0.0807	0.0186	1.45e-05	-4.34	-0.0481	0.0223	0.0309	-2.16	-0.0835	0.0225	0.00021	-3.71
0.0594	0.00938	0.000111	2.45e-10	6.33	0.0977	0.0355	0.00595	2.75	0.0698	0.0157	8.51e-06	4.45	0.0322	0.0168	0.0546	1.92	0.0675	0.0184	0.000249	3.66
-0.0409	0.00647	0.000111	2.46e-10	-6.33	-0.0525	0.0222	0.0178	-2.37	-0.0361	0.0109	0.000893	-3.32	-0.0373	0.012	0.00187	-3.11	-0.0474	0.0124	0.000135	-3.82
-0.0693	0.0109	0.000113	2.49e-10	-6.33	-0.0451	0.0376	0.23	-1.2	-0.073	0.0185	7.7e-05	-3.95	-0.0775	0.0195	7.11e-05	-3.97	-0.0619	0.022	0.00487	-2.82
0.154	0.0244	0.000113	2.5e-10	6.33	0.16	0.0826	0.0522	1.94	0.165	0.0408	5.46e-05	4.03	0.115	0.0479	0.0162	2.41	0.175	0.045	9.99e-05	3.89
-0.0602	0.00952	0.000115	2.53e-10	-6.33	-0.00175	0.0353	0.96	-0.0496	-0.0421	0.0152	0.00556	-2.77	-0.0627	0.0179	0.000455	-3.51	-0.103	0.019	6.47e-08	-5.41
0.0744	0.0118	0.000117	2.59e-10	6.32	0.157	0.0494	0.00144	3.19	0.0671	0.0174	0.000116	3.85	0.0519	0.0218	0.0172	2.38	0.101	0.0268	0.00015	3.79
0.0319	0.00504	0.000119	2.63e-10	6.32	0.069	0.021	0.000991	3.29	0.034	0.00831	4.34e-05	4.09	0.0175	0.00875	0.0451	2	0.0394	0.0102	0.00012	3.85
0.0794	0.0126	0.000119	2.63e-10	6.32	0.121	0.0452	0.00727	2.68	0.11	0.0219	5.02e-07	5.03	0.0361	0.0228	0.113	1.59	0.079	0.0234	0.000737	3.38
-0.0853	0.0135	0.000121	2.68e-10	-6.32	-0.145	0.0542	0.00745	-2.68	-0.0656	0.0185	0.000387	-3.55	-0.108	0.0276	8.61e-05	-3.93	-0.0933	0.0334	0.00513	-2.8
0.108	0.017	0.000123	2.72e-10	6.31	0.0951	0.0576	0.0989	1.65	0.115	0.0263	1.19e-05	4.38	0.0942	0.0332	0.00455	2.84	0.114	0.0357	0.00138	3.2
-0.0661	0.0105	0.000124	2.74e-10	-6.31	-0.149	0.0432	0.00055	-3.46	-0.0835	0.0172	1.13e-06	-4.87	-0.0383	0.0181	0.0341	-2.12	-0.0573	0.0217	0.00815	-2.65
0.0571	0.00905	0.000124	2.75e-10	6.31	0.0783	0.0304	0.00998	2.58	0.0797	0.0159	5.17e-07	5.02	0.0477	0.0167	0.00426	2.86	0.0351	0.0168	0.0363	2.09
0.0937	0.0148	0.000125	2.76e-10	6.31	0.147	0.0535	0.00607	2.74	0.133	0.0254	1.76e-07	5.22	0.0546	0.0264	0.0388	2.07	0.0747	0.0288	0.00946	2.59
0.088	0.014	0.00013	2.87e-10	6.31	0.152	0.0517	0.00325	2.94	0.101	0.0224	7.47e-06	4.48	0.0622	0.0255	0.0147	2.44	0.0805	0.0284	0.00462	2.83
-0.0569	0.00903	0.000134	2.96e-10	-6.3	-0.0382	0.0289	0.186	-1.32	-0.0632	0.0162	9.2e-05	-3.91	-0.0395	0.017	0.0198	-2.33	-0.0724	0.0163	8.79e-06	-4.45
0.0574	0.0091	0.000134	2.96e-10	6.3	0.158	0.0355	8.44e-06	4.45	0.0529	0.0146	0.000297	3.62	0.0284	0.0158	0.0718	1.8	0.0796	0.0197	5.29e-05	4.04
0.0811	0.0129	0.000134	2.97e-10	6.3	0.072	0.0469	0.125	1.54	0.0733	0.0212	0.000537	3.46	0.0793	0.0241	0.000983	3.3	0.0964	0.0248	0.000105	3.88
-0.0679	0.0108	0.000135	2.99e-10	-6.3	-0.0222	0.0382	0.561	-0.581	-0.0745	0.0192	0.000107	-3.87	-0.0737	0.0193	0.00013	-3.83	-0.0671	0.0199	0.000756	-3.37
-0.0779	0.0124	0.000136	2.99e-10	-6.3	-0.163	0.0458	0.000375	-3.56	-0.098	0.0201	1.02e-06	-4.89	-0.0396	0.0222	0.0739	-1.79	-0.0697	0.0255	0.00624	-2.74
0.0684	0.0109	0.000138	3.06e-10	6.3	0.143	0.0395	0.000292	3.62	0.0779	0.0178	1.17e-05	4.38	0.0573	0.0202	0.00457	2.84	0.0454	0.0212	0.0322	2.14
-0.0534	0.0085	0.000146	3.22e-10	-6.29	0.0177	0.0307	0.564	0.577	-0.0544	0.0145	0.000172	-3.76	-0.0597	0.0159	0.000177	-3.75	-0.0649	0.0157	3.55e-05	-4.13
0.0905	0.0144	0.000146	3.22e-10	6.29	0.0708	0.0505	0.161	1.4	0.122	0.0236	2.13e-07	5.19	0.0624	0.0275	0.0229	2.27	0.081	0.0276	0.00332	2.94
0.0715	0.0114	0.000155	3.42e-10	6.28	0.102	0.0417	0.0145	2.45	0.0821	0.0214	0.000128	3.83	0.0678	0.0196	0.000533	3.46	0.0584	0.0207	0.00471	2.83
0.308	0.049	0.000156	3.44e-10	6.28	0.157	0.199	0.429	0.79	0.307	0.0769	6.45e-05	4	0.376	0.0917	4.04e-05	4.11	0.266	0.0987	0.007	2.7
-0.0828	0.0132	0.000157	3.46e-10	-6.28	-0.145	0.0427	0.00069	-3.39	-0.0972	0.0222	1.24e-05	-4.37	-0.0617	0.0231	0.00767	-2.67	-0.0646	0.0276	0.0192	-2.34
-0.0656	0.0105	0.000163	3.61e-10	-6.27	-0.035	0.0324	0.281	-1.08	-0.0579	0.0167	0.000521	-3.47	-0.0868	0.0202	1.77e-05	-4.29	-0.0678	0.0216	0.00165	-3.15
-0.0403	0.00644	0.000171	3.77e-10	-6.26	-0.0291	0.0206	0.158	-1.41	-0.0392	0.011	0.000363	-3.57	-0.036	0.0113	0.00145	-3.18	-0.0526	0.0133	7.44e-05	-3.96
0.0563	0.00899	0.000172	3.79e-10	6.26	0.0899	0.0301	0.00286	2.98	0.0608	0.0151	5.37e-05	4.04	0.0433	0.0167	0.00949	2.59	0.0532	0.0175	0.00236	3.04
0.0321	0.00512	0.000175	3.86e-10	6.26	0.0716	0.0195	0.000249	3.66	0.0347	0.00861	5.54e-05	4.03	0.0253	0.00926	0.00634	2.73	0.0262	0.00982	0.00755	2.67
0.256	0.041	0.00018	3.98e-10	6.25	0.299	0.152	0.0491	1.97	0.288	0.0663	1.42e-05	4.34	0.126	0.0761	0.098	1.65	0.346	0.0813	2.07e-05	4.26
-0.18	0.0287	0.000191	4.21e-10	-6.25	-0.0691	0.0936	0.46	-0.739	-0.171	0.0482	0.000378	-3.56	-0.209	0.0542	0.000112	-3.86	-0.198	0.0554	0.000358	-3.57
-0.0644	0.0103	0.000191	4.22e-10	-6.25	-0.126	0.0398	0.00152	-3.17	-0.0793	0.0179	9.63e-06	-4.43	-0.0492	0.0178	0.00578	-2.76	-0.0495	0.02	0.0132	-2.48
0.05	0.00801	0.000193	4.27e-10	6.24	0.0228	0.0355	0.521	0.642	0.0517	0.0129	6.19e-05	4.01	0.0468	0.0137	0.000643	3.41	0.058	0.0169	0.000604	3.43
0.0815	0.0131	0.000198	4.37e-10	6.24	0.11	0.0416	0.00832	2.64	0.0911	0.0246	0.000211	3.71	0.0796	0.0235	0.000698	3.39	0.0656	0.0234	0.00513	2.8
-0.0607	0.00973	0.0002	4.41e-10	-6.24	-0.0621	0.0315	0.0487	-1.97	-0.0556	0.0165	0.000746	-3.37	-0.0694	0.0183	0.000149	-3.79	-0.0578	0.0186	0.00192	-3.1
0.0474	0.0076	0.000204	4.5e-10	6.24	0.131	0.033	7.62e-05	3.96	0.0391	0.0111	0.000439	3.52	0.0321	0.0142	0.0237	2.26	0.0678	0.0174	9.57e-05	3.9
-0.0532	0.00854	0.000217	4.79e-10	-6.23	-0.045	0.0318	0.156	-1.42	-0.0534	0.0139	0.000122	-3.84	-0.0399	0.0169	0.0186	-2.35	-0.0664	0.0157	2.41e-05	-4.22
-0.0832	0.0134	0.000217	4.8e-10	-6.23	-0.0722	0.0466	0.121	-1.55	-0.0574	0.0219	0.00858	-2.63	-0.111	0.0247	6.71e-06	-4.5	-0.0924	0.0266	0.000528	-3.47
-0.0674	0.0108	0.000217	4.8e-10	-6.23	-0.0446	0.0392	0.256	-1.14	-0.0426	0.0173	0.0139	-2.46	-0.0914	0.0208	1.08e-05	-4.4	-0.0865	0.0212	4.66e-05	-4.07
-0.0948	0.0152	0.000219	4.83e-10	-6.22	-0.117	0.0516	0.0229	-2.28	-0.0914	0.0241	0.000148	-3.79	-0.0657	0.0359	0.0675	-1.83	-0.109	0.0264	3.79e-05	-4.12
-0.0513	0.00825	0.000219	4.84e-10	-6.22	-0.0529	0.0289	0.0673	-1.83	-0.0388	0.0129	0.00259	-3.01	-0.045	0.0167	0.00694	-2.7	-0.0763	0.0161	2.05e-06	-4.75
0.0621	0.00997	0.00022	4.85e-10	6.22	0.149	0.0423	0.00042	3.53	0.0799	0.0171	3.16e-06	4.66	0.0265	0.0176	0.131	1.51	0.064	0.0187	0.000615	3.42
-0.0433	0.00695	0.000222	4.9e-10	-6.22	-0.0526	0.0261	0.0436	-2.02	-0.0358	0.0116	0.00211	-3.07	-0.0279	0.0125	0.0256	-2.23	-0.069	0.0136	3.69e-07	-5.08
0.0806	0.013	0.000223	4.93e-10	6.22	0.217	0.0535	5.12e-05	4.05	0.0986	0.0198	6.47e-07	4.98	0.0476	0.0235	0.0432	2.02	0.0537	0.0282	0.0573	1.9
0.0539	0.00866	0.000226	4.99e-10	6.22	0.151	0.0361	3.09e-05	4.17	0.0552	0.0149	0.000221	3.69	0.0378	0.0144	0.00866	2.63	0.053	0.0175	0.00243	3.03
-0.107	0.0172	0.000234	5.17e-10	-6.21	-0.0797	0.0608	0.19	-1.31	-0.0658	0.029	0.0232	-2.27	-0.143	0.0309	3.68e-06	-4.63	-0.129	0.0341	0.000156	-3.78
-0.0426	0.00685	0.000234	5.18e-10	-6.21	-0.0366	0.0288	0.204	-1.27	-0.0433	0.0108	5.91e-05	-4.02	-0.0412	0.0123	0.000822	-3.35	-0.0446	0.0143	0.0018	-3.12
-0.0921	0.0148	0.000236	5.22e-10	-6.21	-0.178	0.0603	0.00319	-2.95	-0.0838	0.0244	0.000591	-3.44	-0.0819	0.0274	0.00279	-2.99	-0.0955	0.0282	0.000716	-3.38
0.0556	0.00895	0.000237	5.24e-10	6.21	0.129	0.0381	0.000693	3.39	0.0625	0.0161	0.000101	3.89	0.0409	0.0148	0.00586	2.76	0.0525	0.0172	0.00228	3.05
0.136	0.022	0.000242	5.35e-10	6.21	0.111	0.0812	0.171	1.37	0.17	0.0397	1.81e-05	4.29	0.0977	0.0374	0.0091	2.61	0.154	0.0418	0.00023	3.68
0.0419	0.00675	0.000247	5.45e-10	6.21	0.0821	0.0259	0.00151	3.17	0.0505	0.0122	3.51e-05	4.14	0.0347	0.0117	0.00309	2.96	0.0318	0.0124	0.0106	2.56
0.0528	0.00853	0.000269	5.94e-10	6.19	0.115	0.0336	0.00061	3.43	0.0342	0.0141	0.0156	2.42	0.0594	0.0155	0.000133	3.82	0.0558	0.0164	0.000687	3.39
-0.0531	0.00858	0.000272	6e-10	-6.19	-0.111	0.0343	0.00123	-3.23	-0.0578	0.0141	4.27e-05	-4.09	-0.0385	0.0153	0.0116	-2.52	-0.0503	0.0171	0.00327	-2.94
0.0605	0.00978	0.000273	6.03e-10	6.19	0.198	0.0376	1.31e-07	5.28	0.0731	0.0161	5.93e-06	4.53	0.0199	0.0167	0.235	1.19	0.0603	0.0207	0.00355	2.92
-0.0368	0.00595	0.000274	6.06e-10	-6.19	-0.00774	0.02	0.699	-0.387	-0.033	0.01	0.000967	-3.3	-0.0485	0.0108	7.44e-06	-4.48	-0.0382	0.0117	0.00112	-3.26
-0.0865	0.014	0.000274	6.06e-10	-6.19	-0.087	0.0501	0.0827	-1.74	-0.0812	0.022	0.000216	-3.7	-0.1	0.0247	4.94e-05	-4.06	-0.0747	0.0315	0.0176	-2.37
0.162	0.0262	0.000276	6.1e-10	6.19	0.106	0.104	0.306	1.02	0.161	0.0443	0.000271	3.64	0.176	0.0462	0.000137	3.81	0.16	0.0511	0.00173	3.13
-0.0701	0.0113	0.000282	6.24e-10	-6.18	-0.0554	0.0415	0.182	-1.33	-0.0625	0.0178	0.000447	-3.51	-0.0656	0.0209	0.00173	-3.13	-0.0942	0.0238	7.38e-05	-3.96
-0.064	0.0103	0.000286	6.33e-10	-6.18	-0.0687	0.0413	0.0964	-1.66	-0.0823	0.0164	4.98e-07	-5.03	-0.0676	0.0189	0.000346	-3.58	-0.0274	0.0212	0.197	-1.29
-0.128	0.0208	0.000297	6.56e-10	-6.18	-0.0876	0.0749	0.242	-1.17	-0.116	0.0353	0.00106	-3.27	-0.141	0.0373	0.000162	-3.77	-0.142	0.0401	0.000414	-3.53
0.0571	0.00924	0.000298	6.59e-10	6.18	0.159	0.0398	6.41e-05	4	0.0473	0.0156	0.00238	3.04	0.0484	0.016	0.00246	3.03	0.0603	0.0181	0.000888	3.32
-0.0651	0.0105	0.000303	6.69e-10	-6.17	-0.018	0.0408	0.659	-0.441	-0.0677	0.0179	0.000161	-3.77	-0.06	0.0182	0.00101	-3.29	-0.0809	0.021	0.000116	-3.86
-0.0726	0.0118	0.000308	6.8e-10	-6.17	-0.144	0.0543	0.00789	-2.66	-0.0966	0.0185	1.7e-07	-5.23	-0.0358	0.0211	0.0895	-1.7	-0.0657	0.0242	0.00672	-2.71
0.0438	0.0071	0.000319	7.06e-10	6.16	0.0381	0.0286	0.182	1.33	0.0334	0.0113	0.003	2.97	0.051	0.0128	6.52e-05	3.99	0.0534	0.0147	0.000294	3.62
-0.0471	0.00764	0.000321	7.1e-10	-6.16	-0.0579	0.0283	0.0405	-2.05	-0.0404	0.0126	0.0013	-3.22	-0.0366	0.0139	0.00823	-2.64	-0.0661	0.0151	1.28e-05	-4.36
-0.0565	0.00917	0.000329	7.26e-10	-6.16	-0.0807	0.0342	0.0181	-2.36	-0.0649	0.0152	1.9e-05	-4.28	-0.0532	0.0173	0.00212	-3.07	-0.0427	0.0172	0.0133	-2.48
-0.0802	0.013	0.000334	7.38e-10	-6.16	-0.162	0.0519	0.00177	-3.13	-0.0767	0.0186	3.82e-05	-4.12	-0.0461	0.0251	0.0665	-1.84	-0.112	0.0308	0.000271	-3.64
-0.0374	0.00608	0.000334	7.39e-10	-6.16	-0.0269	0.0235	0.253	-1.14	-0.032	0.0102	0.00168	-3.14	-0.0418	0.0106	8.28e-05	-3.94	-0.0423	0.0122	0.000519	-3.47
0.0506	0.00822	0.000337	7.44e-10	6.16	0.0624	0.0271	0.0215	2.3	0.0627	0.0147	1.99e-05	4.27	0.0645	0.0147	1.11e-05	4.4	0.0179	0.0155	0.249	1.15
-0.0677	0.011	0.000345	7.62e-10	-6.15	-0.0491	0.0385	0.202	-1.28	-0.0391	0.0189	0.0385	-2.07	-0.0931	0.0208	7.36e-06	-4.48	-0.0814	0.0201	5.32e-05	-4.04
-0.0483	0.00786	0.000352	7.77e-10	-6.15	-0.0751	0.0266	0.00468	-2.83	-0.053	0.013	4.51e-05	-4.08	-0.0324	0.015	0.0311	-2.16	-0.0495	0.0151	0.00101	-3.29
0.0572	0.00932	0.000364	8.04e-10	6.14	0.101	0.0305	0.000965	3.3	0.0758	0.0164	3.68e-06	4.63	0.0313	0.0161	0.0522	1.94	0.0517	0.0187	0.00564	2.77
0.0604	0.00983	0.000367	8.1e-10	6.14	0.101	0.039	0.00979	2.58	0.0737	0.0169	1.32e-05	4.36	0.0296	0.018	0.101	1.64	0.0674	0.0179	0.000168	3.76
-0.0811	0.0132	0.00037	8.18e-10	-6.14	-0.0226	0.0441	0.609	-0.512	-0.0874	0.021	3.04e-05	-4.17	-0.0859	0.0243	0.000416	-3.53	-0.087	0.0282	0.00202	-3.09
0.057	0.0093	0.000387	8.55e-10	6.13	0.0547	0.0389	0.16	1.4	0.0776	0.0157	7.25e-07	4.95	0.0539	0.0163	0.000976	3.3	0.0342	0.018	0.0573	1.9
0.0508	0.00829	0.000393	8.69e-10	6.13	0.0522	0.0294	0.0754	1.78	0.0581	0.0129	6.88e-06	4.5	0.0603	0.0148	4.58e-05	4.08	0.0196	0.0188	0.295	1.05
0.0682	0.0111	0.000411	9.07e-10	6.12	0.127	0.0411	0.00203	3.09	0.0835	0.0179	3.23e-06	4.66	0.0383	0.0199	0.0545	1.92	0.0645	0.0233	0.0056	2.77
-0.05	0.00816	0.000421	9.31e-10	-6.12	-0.00786	0.0253	0.756	-0.31	-0.0538	0.0132	4.33e-05	-4.09	-0.0389	0.016	0.0154	-2.42	-0.0728	0.0162	7.4e-06	-4.48
0.0822	0.0134	0.000424	9.36e-10	6.12	0.139	0.056	0.0129	2.49	0.0814	0.0224	0.000285	3.63	0.0746	0.0244	0.00218	3.06	0.0798	0.0254	0.0017	3.14
-0.109	0.0177	0.000425	9.38e-10	-6.12	-0.126	0.0721	0.0813	-1.74	-0.0959	0.0279	0.000577	-3.44	-0.128	0.0329	9.75e-05	-3.9	-0.102	0.036	0.00461	-2.83
-0.0507	0.0083	0.000435	9.62e-10	-6.12	-0.0544	0.0315	0.0837	-1.73	-0.0481	0.0129	0.00019	-3.73	-0.0453	0.0156	0.00382	-2.89	-0.0608	0.0171	0.000378	-3.55
0.0643	0.0105	0.000446	9.85e-10	6.11	0.103	0.0316	0.00117	3.25	0.0706	0.0174	4.94e-05	4.06	0.0612	0.0196	0.00182	3.12	0.0403	0.0216	0.0621	1.87
0.086	0.0141	0.000457	1.01e-09	6.11	0.133	0.0444	0.00278	2.99	0.115	0.0248	3.33e-06	4.65	0.0577	0.0284	0.0424	2.03	0.0643	0.0245	0.00869	2.62
0.082	0.0134	0.000457	1.01e-09	6.11	0.0744	0.0377	0.0487	1.97	0.132	0.0223	3.27e-09	5.92	0.0387	0.0274	0.158	1.41	0.0571	0.0257	0.0265	2.22
0.0505	0.00828	0.000461	1.02e-09	6.11	0.0809	0.0325	0.0128	2.49	0.0567	0.0148	0.000124	3.84	0.0442	0.0147	0.00272	3	0.0443	0.015	0.00305	2.96
0.0899	0.0147	0.000468	1.03e-09	6.1	0.117	0.0619	0.0592	1.89	0.0829	0.0233	0.000385	3.55	0.0727	0.0264	0.00586	2.76	0.118	0.0304	0.000104	3.88
0.0422	0.00692	0.000468	1.03e-09	6.1	0.0689	0.0344	0.0452	2	0.0513	0.0113	5.97e-06	4.53	0.0252	0.0122	0.0389	2.07	0.046	0.0134	0.000611	3.43
0.0408	0.00669	0.000475	1.05e-09	6.1	0.0838	0.0279	0.0027	3	0.0583	0.0118	7.2e-07	4.96	0.0204	0.0112	0.0678	1.83	0.0379	0.0132	0.00394	2.88
0.0561	0.0092	0.000481	1.06e-09	6.1	0.0929	0.0339	0.00611	2.74	0.0653	0.0162	5.86e-05	4.02	0.037	0.016	0.0206	2.32	0.0586	0.0176	0.000853	3.34
-0.049	0.00804	0.000483	1.07e-09	-6.1	-0.0625	0.0292	0.0326	-2.14	-0.0491	0.0134	0.000237	-3.68	-0.0442	0.0151	0.00342	-2.93	-0.0501	0.0152	0.000978	-3.3
-0.0516	0.00846	0.000483	1.07e-09	-6.1	-0.00949	0.0297	0.75	-0.319	-0.0455	0.0156	0.00347	-2.92	-0.046	0.015	0.00215	-3.07	-0.0742	0.0153	1.17e-06	-4.86
0.0319	0.00522	0.000485	1.07e-09	6.1	0.0733	0.0203	0.000299	3.62	0.0268	0.00853	0.00164	3.15	0.0211	0.00989	0.033	2.13	0.0395	0.0099	6.44e-05	4
0.0467	0.00767	0.000495	1.09e-09	6.1	0.139	0.0332	2.66e-05	4.2	0.0385	0.012	0.00136	3.2	0.0294	0.0155	0.0584	1.89	0.0556	0.0141	7.96e-05	3.95
0.0442	0.00726	0.000501	1.11e-09	6.09	0.0642	0.0286	0.0245	2.25	0.0481	0.0118	4.52e-05	4.08	0.0496	0.0134	0.000227	3.69	0.0279	0.0141	0.0475	1.98
0.0573	0.0094	0.000505	1.12e-09	6.09	0.0234	0.029	0.421	0.804	0.0536	0.0195	0.00587	2.75	0.0598	0.0168	0.000374	3.56	0.0676	0.0159	2.14e-05	4.25
0.0588	0.00966	0.000508	1.12e-09	6.09	0.123	0.0442	0.00524	2.79	0.0595	0.0134	9.29e-06	4.43	0.0424	0.0181	0.019	2.35	0.0673	0.025	0.00717	2.69
0.0652	0.0107	0.000508	1.12e-09	6.09	0.128	0.048	0.00778	2.66	0.0732	0.0158	3.38e-06	4.65	0.0229	0.0208	0.271	1.1	0.0854	0.0227	0.000171	3.76
-0.0477	0.00784	0.000517	1.14e-09	-6.09	0.00286	0.0257	0.911	0.111	-0.0474	0.013	0.000271	-3.64	-0.0472	0.0148	0.00146	-3.18	-0.0663	0.0152	1.29e-05	-4.36
-0.0829	0.0136	0.000527	1.17e-09	-6.08	-0.091	0.0474	0.0547	-1.92	-0.0949	0.0221	1.76e-05	-4.29	-0.0633	0.025	0.0112	-2.54	-0.0854	0.0278	0.00214	-3.07
-0.0763	0.0125	0.000534	1.18e-09	-6.08	-0.0967	0.0398	0.0152	-2.43	-0.0843	0.0227	0.000201	-3.72	-0.0643	0.0215	0.00275	-2.99	-0.0748	0.0249	0.00268	-3
-0.0312	0.00513	0.000543	1.2e-09	-6.08	-0.0393	0.0207	0.0578	-1.9	-0.0321	0.00786	4.44e-05	-4.08	-0.0331	0.0106	0.00176	-3.13	-0.0265	0.00977	0.00672	-2.71
0.119	0.0195	0.000545	1.2e-09	6.08	0.143	0.061	0.0192	2.34	0.192	0.0348	3.81e-08	5.5	0.0541	0.0352	0.125	1.54	0.0982	0.0369	0.00781	2.66
-0.052	0.00856	0.000546	1.21e-09	-6.08	-0.0996	0.0363	0.00609	-2.74	-0.0669	0.0139	1.4e-06	-4.82	-0.0322	0.0147	0.029	-2.18	-0.0449	0.018	0.0125	-2.5
0.0706	0.0116	0.000555	1.23e-09	6.08	0.11	0.0455	0.0159	2.41	0.0608	0.0181	0.000786	3.36	0.083	0.0214	0.000109	3.87	0.0611	0.0242	0.0115	2.53
0.0749	0.0123	0.000561	1.24e-09	6.08	0.168	0.0422	6.84e-05	3.98	0.101	0.0234	1.79e-05	4.29	0.042	0.0201	0.037	2.09	0.0645	0.024	0.00719	2.69
0.0565	0.00931	0.00058	1.28e-09	6.07	0.152	0.0335	5.32e-06	4.55	0.034	0.0158	0.0312	2.15	0.0391	0.0175	0.0253	2.24	0.0751	0.0173	1.4e-05	4.34
0.0758	0.0125	0.000589	1.3e-09	6.07	0.172	0.0502	0.000593	3.44	0.0707	0.0187	0.00016	3.78	0.0658	0.0239	0.00589	2.75	0.0714	0.0267	0.00747	2.68
0.0476	0.00784	0.000603	1.33e-09	6.06	0.0268	0.0328	0.413	0.819	0.0596	0.0123	1.16e-06	4.86	0.0116	0.0142	0.415	0.815	0.0796	0.0165	1.32e-06	4.84
0.0801	0.0132	0.000607	1.34e-09	6.06	0.165	0.0504	0.00109	3.27	0.0862	0.0227	0.000149	3.79	0.0556	0.0229	0.0152	2.43	0.0811	0.0258	0.0017	3.14
0.0759	0.0125	0.000629	1.39e-09	6.06	0.182	0.0516	0.000415	3.53	0.0866	0.0205	2.4e-05	4.22	0.0582	0.0224	0.00946	2.59	0.0573	0.0248	0.0208	2.31
0.0589	0.00973	0.000637	1.41e-09	6.05	0.145	0.0359	5.18e-05	4.05	0.0598	0.0162	0.000226	3.69	0.041	0.0174	0.0183	2.36	0.0547	0.0193	0.00466	2.83
-0.0454	0.0075	0.000643	1.42e-09	-6.05	-0.0258	0.0307	0.402	-0.838	-0.0349	0.0126	0.00564	-2.77	-0.0665	0.0128	2.12e-07	-5.19	-0.0359	0.0152	0.0183	-2.36
0.0569	0.00941	0.000653	1.44e-09	6.05	0.0751	0.0354	0.0341	2.12	0.0734	0.0167	1.09e-05	4.4	0.0513	0.0168	0.00221	3.06	0.0409	0.0173	0.0178	2.37
-0.0682	0.0113	0.000657	1.45e-09	-6.05	-0.0808	0.0478	0.091	-1.69	-0.0691	0.0187	0.000221	-3.69	-0.0628	0.0199	0.0016	-3.16	-0.071	0.0221	0.00133	-3.21
-0.0365	0.00604	0.000665	1.47e-09	-6.05	-0.0532	0.0245	0.0295	-2.18	-0.0391	0.00907	1.59e-05	-4.32	-0.0244	0.0112	0.0298	-2.17	-0.043	0.0133	0.00124	-3.23
0.101	0.0167	0.000671	1.48e-09	6.05	0.103	0.0402	0.0101	2.57	0.152	0.0385	8.14e-05	3.94	0.0964	0.0307	0.00168	3.14	0.0758	0.0285	0.0078	2.66
-0.0366	0.00606	0.000689	1.52e-09	-6.04	-0.00904	0.0212	0.67	-0.426	-0.026	0.011	0.0184	-2.36	-0.0349	0.0104	0.000786	-3.36	-0.0583	0.0115	3.99e-07	-5.07
-0.0438	0.00724	0.000701	1.55e-09	-6.04	0.0273	0.0248	0.272	1.1	-0.075	0.013	7.63e-09	-5.78	-0.0628	0.0128	9.91e-07	-4.89	-0.00955	0.0136	0.481	-0.704
0.0303	0.00502	0.000702	1.55e-09	6.04	0.0381	0.0182	0.0362	2.1	0.04	0.00873	4.58e-06	4.58	0.0226	0.00892	0.0113	2.53	0.0254	0.00952	0.00775	2.66
-0.145	0.024	0.000722	1.59e-09	-6.03	0.00572	0.0782	0.942	0.0731	-0.158	0.0366	1.63e-05	-4.31	-0.141	0.0472	0.00273	-3	-0.189	0.0516	0.000249	-3.66
0.053	0.00878	0.000736	1.63e-09	6.03	0.12	0.0369	0.00113	3.26	0.0411	0.0157	0.00895	2.61	0.0334	0.0153	0.0297	2.17	0.0738	0.0159	3.64e-06	4.63
-0.0594	0.00986	0.000764	1.69e-09	-6.03	-0.205	0.0414	6.87e-07	-4.97	-0.0723	0.0165	1.19e-05	-4.38	-0.0283	0.0176	0.107	-1.61	-0.0481	0.0189	0.0112	-2.54
0.0873	0.0145	0.000771	1.7e-09	6.02	0.166	0.0707	0.0188	2.35	0.108	0.0214	4.21e-07	5.06	0.0359	0.0255	0.16	1.4	0.108	0.0344	0.00175	3.13
-0.121	0.0201	0.000772	1.71e-09	-6.02	-0.28	0.0949	0.00316	-2.95	-0.0834	0.0296	0.00488	-2.81	-0.145	0.0369	8.68e-05	-3.92	-0.136	0.045	0.00242	-3.03
0.0425	0.00706	0.000785	1.73e-09	6.02	0.0785	0.0264	0.00297	2.97	0.0448	0.0117	0.000133	3.82	0.0246	0.0122	0.0426	2.03	0.054	0.0148	0.000255	3.66
0.0605	0.01	0.000786	1.74e-09	6.02	0.0642	0.0336	0.0558	1.91	0.079	0.0167	2.32e-06	4.72	0.0476	0.0182	0.00889	2.62	0.0478	0.0203	0.0184	2.36
-0.0787	0.0131	0.000786	1.74e-09	-6.02	-0.0834	0.0461	0.0703	-1.81	-0.0764	0.023	0.000913	-3.32	-0.0454	0.0229	0.0476	-1.98	-0.119	0.025	1.8e-06	-4.78
-0.0597	0.00992	0.000791	1.75e-09	-6.02	-0.0629	0.0303	0.0376	-2.08	-0.0665	0.0176	0.000152	-3.79	-0.038	0.0185	0.0397	-2.06	-0.0726	0.0185	8.91e-05	-3.92
-0.0909	0.0151	0.000804	1.78e-09	-6.02	-0.25	0.0486	2.55e-07	-5.15	-0.105	0.0242	1.54e-05	-4.32	-0.0214	0.0278	0.441	-0.771	-0.0899	0.0323	0.00541	-2.78
0.083	0.0138	0.000805	1.78e-09	6.02	0.0522	0.0434	0.229	1.2	0.0751	0.0225	0.000849	3.34	0.106	0.025	2.21e-05	4.24	0.0786	0.0294	0.0076	2.67
0.0627	0.0104	0.000814	1.8e-09	6.01	0.129	0.0399	0.00121	3.24	0.0736	0.0193	0.000135	3.82	0.0523	0.0182	0.00401	2.88	0.0489	0.0187	0.00904	2.61
-0.06	0.00998	0.000825	1.82e-09	-6.01	-0.0459	0.0273	0.0923	-1.68	-0.0921	0.0192	1.53e-06	-4.81	-0.0586	0.0194	0.00256	-3.02	-0.0405	0.0173	0.0194	-2.34
-0.0553	0.0092	0.000841	1.86e-09	-6.01	-0.0676	0.0354	0.0563	-1.91	-0.0502	0.0153	0.00103	-3.28	-0.0477	0.0166	0.00406	-2.87	-0.0679	0.0179	0.00015	-3.79
-0.0345	0.00573	0.000842	1.86e-09	-6.01	-0.0324	0.0212	0.127	-1.52	-0.0241	0.00974	0.0134	-2.47	-0.0495	0.00981	4.57e-07	-5.04	-0.0286	0.0117	0.0145	-2.44
-0.0286	0.00476	0.000861	1.9e-09	-6.01	-0.0467	0.0218	0.0318	-2.15	-0.0303	0.00751	5.47e-05	-4.03	-0.0204	0.00836	0.0146	-2.44	-0.0332	0.00996	0.000843	-3.34
-0.0649	0.0108	0.000869	1.92e-09	-6	-0.102	0.0412	0.0135	-2.47	-0.0443	0.0163	0.00656	-2.72	-0.0475	0.0207	0.0215	-2.3	-0.117	0.0232	4.59e-07	-5.04
0.0546	0.0091	0.00087	1.92e-09	6	0.0675	0.0407	0.0976	1.66	0.025	0.0139	0.0718	1.8	0.0669	0.0176	0.000146	3.8	0.0891	0.018	7.77e-07	4.94
0.0649	0.0108	0.000891	1.97e-09	6	0.104	0.0356	0.00337	2.93	0.0801	0.0197	4.73e-05	4.07	0.0409	0.0201	0.0424	2.03	0.0608	0.0192	0.00154	3.17
-0.0592	0.00988	0.00091	2.01e-09	-6	-0.0417	0.0383	0.276	-1.09	-0.0701	0.0164	1.89e-05	-4.28	-0.0373	0.017	0.0281	-2.2	-0.0796	0.0206	0.000109	-3.87
0.0367	0.00612	0.000917	2.03e-09	6	0.0925	0.0207	7.82e-06	4.47	0.0499	0.0109	4.62e-06	4.58	0.0215	0.0111	0.0538	1.93	0.0216	0.0113	0.0554	1.92
-0.0467	0.0078	0.000925	2.04e-09	-5.99	-0.0891	0.0285	0.00177	-3.13	-0.0391	0.0132	0.00302	-2.97	-0.0288	0.015	0.054	-1.93	-0.061	0.0141	1.58e-05	-4.32
0.092	0.0153	0.000934	2.06e-09	5.99	0.0636	0.0593	0.283	1.07	0.109	0.0247	1.06e-05	4.4	0.0387	0.0302	0.199	1.28	0.124	0.0285	1.49e-05	4.33
0.0542	0.00904	0.00095	2.1e-09	5.99	0.0966	0.0307	0.00164	3.15	0.0695	0.0169	3.99e-05	4.11	0.0321	0.0162	0.0477	1.98	0.0503	0.0161	0.00174	3.13
-0.0614	0.0103	0.000975	2.15e-09	-5.99	-0.0937	0.0355	0.00831	-2.64	-0.0737	0.017	1.5e-05	-4.33	-0.0471	0.0175	0.00722	-2.69	-0.0506	0.0223	0.0232	-2.27
-0.0798	0.0133	0.00099	2.19e-09	-5.98	-0.126	0.0388	0.00121	-3.24	-0.0571	0.0207	0.00577	-2.76	-0.085	0.027	0.00162	-3.15	-0.0927	0.0284	0.00112	-3.26
-0.0547	0.00914	0.000991	2.19e-09	-5.98	-0.0552	0.0374	0.14	-1.48	-0.0587	0.015	9.61e-05	-3.9	-0.0567	0.0159	0.000355	-3.57	-0.0455	0.0186	0.0145	-2.44
-0.0454	0.0076	0.001	2.22e-09	-5.98	-0.072	0.0251	0.00412	-2.87	-0.0431	0.0126	0.000616	-3.42	-0.0337	0.0139	0.0156	-2.42	-0.0532	0.0153	0.000506	-3.48
0.073	0.0122	0.00101	2.23e-09	5.98	0.127	0.0507	0.0125	2.5	0.109	0.0196	2.38e-08	5.58	0.0288	0.0208	0.166	1.39	0.0635	0.0268	0.0178	2.37
0.0721	0.0121	0.00101	2.24e-09	5.98	0.185	0.0534	0.000521	3.47	0.062	0.0169	0.000237	3.68	0.0662	0.0257	0.01	2.58	0.0752	0.0258	0.00358	2.91
-0.068	0.0114	0.00108	2.38e-09	-5.97	-0.109	0.051	0.0324	-2.14	-0.0791	0.0182	1.44e-05	-4.34	-0.0501	0.0205	0.0146	-2.44	-0.0645	0.0227	0.00447	-2.84
-0.0437	0.00733	0.00108	2.39e-09	-5.97	-0.0772	0.0282	0.00616	-2.74	-0.0586	0.0123	2e-06	-4.75	-0.0151	0.0136	0.266	-1.11	-0.0467	0.0137	0.000637	-3.42
0.0727	0.0122	0.00108	2.4e-09	5.97	0.244	0.0552	9.68e-06	4.42	0.0801	0.0171	2.69e-06	4.69	0.0366	0.0243	0.133	1.5	0.0566	0.0278	0.0418	2.04
0.0934	0.0157	0.00113	2.5e-09	5.96	0.108	0.0546	0.048	1.98	0.0938	0.0255	0.000239	3.67	0.0806	0.0289	0.00531	2.79	0.103	0.0314	0.00106	3.27
0.0526	0.00882	0.00113	2.5e-09	5.96	0.0894	0.0364	0.014	2.46	0.0553	0.014	8.18e-05	3.94	0.039	0.0167	0.0198	2.33	0.0544	0.017	0.00134	3.21
-0.0361	0.00606	0.00114	2.51e-09	-5.96	-0.0636	0.0242	0.0085	-2.63	-0.0252	0.00972	0.00966	-2.59	-0.0307	0.0106	0.00381	-2.89	-0.0556	0.0129	1.57e-05	-4.32
0.0598	0.01	0.00116	2.56e-09	5.96	0.169	0.0396	1.94e-05	4.27	0.0543	0.0165	0.000994	3.29	0.0338	0.0175	0.0528	1.94	0.0752	0.0207	0.000288	3.63
-0.0396	0.00665	0.00116	2.57e-09	-5.96	-0.021	0.0263	0.423	-0.802	-0.0357	0.0111	0.00127	-3.22	-0.0285	0.0125	0.023	-2.27	-0.0593	0.0123	1.41e-06	-4.82
-0.0575	0.00966	0.00123	2.71e-09	-5.95	-0.0909	0.0368	0.0136	-2.47	-0.039	0.0166	0.0187	-2.35	-0.0468	0.0169	0.00563	-2.77	-0.0855	0.0188	5.1e-06	-4.56
0.111	0.0187	0.00123	2.71e-09	5.95	0.178	0.0711	0.0125	2.5	0.109	0.0312	0.000486	3.49	0.106	0.0352	0.00273	3	0.103	0.0344	0.00277	2.99
-0.078	0.0131	0.00123	2.72e-09	-5.95	-0.125	0.0441	0.00472	-2.83	-0.126	0.0237	1.1e-07	-5.31	-0.0213	0.0226	0.346	-0.942	-0.079	0.0253	0.00176	-3.13
-0.0967	0.0163	0.00126	2.78e-09	-5.94	-0.154	0.0613	0.0118	-2.52	-0.103	0.0244	2.54e-05	-4.21	-0.0872	0.0328	0.00785	-2.66	-0.0782	0.0333	0.0188	-2.35
-0.0739	0.0124	0.00127	2.81e-09	-5.94	-0.0498	0.0437	0.255	-1.14	-0.0552	0.0214	0.00994	-2.58	-0.101	0.0208	1.24e-06	-4.85	-0.0679	0.0263	0.00987	-2.58
0.0458	0.00771	0.00127	2.81e-09	5.94	0.0826	0.0294	0.00493	2.81	0.0434	0.014	0.00193	3.1	0.0323	0.0135	0.0169	2.39	0.0544	0.014	0.000104	3.88
-0.0461	0.00776	0.00129	2.85e-09	-5.94	-0.0632	0.0252	0.0121	-2.51	-0.0637	0.0142	7e-06	-4.49	-0.0229	0.0132	0.083	-1.73	-0.0502	0.0152	0.000938	-3.31
-0.055	0.00927	0.00134	2.96e-09	-5.93	-0.0498	0.0291	0.0874	-1.71	-0.0417	0.0165	0.0115	-2.53	-0.0395	0.0171	0.0209	-2.31	-0.087	0.0172	4.39e-07	-5.05
-0.0525	0.00886	0.00137	3.03e-09	-5.93	-0.0561	0.0279	0.0442	-2.01	-0.0656	0.0173	0.000151	-3.79	-0.0387	0.0154	0.0118	-2.52	-0.0551	0.016	0.000582	-3.44
0.0612	0.0103	0.00138	3.04e-09	5.93	-0.00276	0.0427	0.949	-0.0645	0.0841	0.0164	3.01e-07	5.12	0.0357	0.0183	0.0503	1.96	0.074	0.0218	0.000676	3.4
-0.0716	0.0121	0.0014	3.1e-09	-5.93	-0.102	0.0489	0.0376	-2.08	-0.0683	0.0183	0.000193	-3.73	-0.0743	0.0219	0.000711	-3.39	-0.0654	0.0269	0.015	-2.43
-0.0667	0.0113	0.00143	3.16e-09	-5.92	-0.0931	0.0388	0.0163	-2.4	-0.0659	0.018	0.000256	-3.66	-0.0366	0.021	0.0816	-1.74	-0.0951	0.0231	3.88e-05	-4.11
-0.0781	0.0132	0.00143	3.16e-09	-5.92	-0.0632	0.0522	0.226	-1.21	-0.0703	0.0211	0.000846	-3.34	-0.0809	0.0251	0.00124	-3.23	-0.0904	0.0256	0.000403	-3.54
0.0387	0.00654	0.00143	3.16e-09	5.92	0.0375	0.0272	0.168	1.38	0.0343	0.0104	0.00101	3.29	0.0391	0.0119	0.00101	3.29	0.0455	0.0131	0.000529	3.47
0.0896	0.0151	0.00143	3.16e-09	5.92	0.0866	0.0565	0.126	1.53	0.0879	0.0234	0.000174	3.75	0.0646	0.0294	0.028	2.2	0.12	0.0305	8.09e-05	3.94
-0.0992	0.0168	0.0015	3.3e-09	-5.92	-0.0596	0.0599	0.32	-0.994	-0.072	0.0275	0.0088	-2.62	-0.0976	0.0299	0.00109	-3.27	-0.158	0.0347	5.05e-06	-4.56
-0.144	0.0243	0.0015	3.32e-09	-5.92	-0.15	0.0929	0.106	-1.62	-0.109	0.0369	0.00307	-2.96	-0.136	0.0457	0.00302	-2.97	-0.222	0.0523	2.29e-05	-4.23
-0.0617	0.0104	0.00151	3.34e-09	-5.91	-0.108	0.0404	0.00748	-2.67	-0.0498	0.0175	0.00447	-2.84	-0.035	0.0179	0.0506	-1.96	-0.104	0.0214	1.01e-06	-4.89
-0.0441	0.00746	0.00152	3.36e-09	-5.91	-0.0986	0.0517	0.0563	-1.91	-0.0493	0.0144	0.000613	-3.43	-0.0253	0.0127	0.0463	-1.99	-0.0552	0.0124	8.31e-06	-4.46
-0.0729	0.0123	0.00152	3.36e-09	-5.91	-0.0904	0.0433	0.0368	-2.09	-0.0538	0.019	0.00463	-2.83	-0.0648	0.023	0.00481	-2.82	-0.116	0.027	1.71e-05	-4.3
-0.0545	0.00922	0.00153	3.38e-09	-5.91	-0.0576	0.0328	0.0794	-1.75	-0.0864	0.0159	5.62e-08	-5.43	-0.0351	0.0167	0.0358	-2.1	-0.0365	0.0174	0.0356	-2.1
0.0551	0.00932	0.00153	3.38e-09	5.91	0.111	0.0353	0.00158	3.16	0.0586	0.0163	0.000332	3.59	0.0305	0.0161	0.0574	1.9	0.0671	0.018	0.000199	3.72
0.06	0.0102	0.0016	3.53e-09	5.9	0.108	0.0335	0.00122	3.23	0.0834	0.0201	3.38e-05	4.15	0.0371	0.0168	0.0271	2.21	0.0529	0.019	0.00529	2.79
-0.0315	0.00534	0.0016	3.53e-09	-5.9	-0.0448	0.0181	0.0132	-2.48	-0.0439	0.00954	4.2e-06	-4.6	-0.0231	0.01	0.0214	-2.3	-0.0232	0.00952	0.0148	-2.44
-0.0664	0.0112	0.0016	3.53e-09	-5.9	-0.0382	0.0408	0.35	-0.935	-0.0936	0.0181	2.31e-07	-5.17	-0.0433	0.0202	0.0318	-2.15	-0.061	0.0235	0.0095	-2.59
-0.0326	0.00552	0.00161	3.55e-09	-5.9	-0.0206	0.0187	0.271	-1.1	-0.0419	0.00967	1.49e-05	-4.33	-0.0353	0.00941	0.000179	-3.75	-0.0206	0.0112	0.0645	-1.85
0.0516	0.00875	0.00163	3.61e-09	5.9	0.143	0.0418	0.000636	3.42	0.0653	0.0134	1.06e-06	4.88	0.0251	0.0146	0.0859	1.72	0.0493	0.0211	0.0193	2.34
0.045	0.00762	0.00163	3.61e-09	5.9	0.123	0.0304	4.83e-05	4.06	0.0392	0.0129	0.00231	3.05	0.0357	0.0134	0.00767	2.67	0.0453	0.0149	0.00232	3.05
0.0558	0.00946	0.00165	3.65e-09	5.9	0.0863	0.0317	0.00651	2.72	0.0694	0.0197	0.000417	3.53	0.0426	0.0171	0.0129	2.49	0.051	0.0155	0.000985	3.29
-0.0882	0.0149	0.00166	3.67e-09	-5.9	-0.0652	0.0597	0.275	-1.09	-0.0738	0.0243	0.00239	-3.04	-0.112	0.0268	2.76e-05	-4.19	-0.0856	0.03	0.00437	-2.85
0.0568	0.00962	0.00166	3.67e-09	5.9	0.0763	0.033	0.0208	2.31	0.0358	0.0158	0.0229	2.27	0.0818	0.0173	2.33e-06	4.72	0.05	0.0199	0.0122	2.51
0.048	0.00814	0.00171	3.78e-09	5.89	0.0839	0.0268	0.00175	3.13	0.0486	0.0188	0.00969	2.59	0.0358	0.0142	0.0118	2.52	0.0495	0.013	0.000144	3.8
-0.0819	0.0139	0.00175	3.86e-09	-5.89	-0.172	0.0562	0.00224	-3.06	-0.056	0.0206	0.00658	-2.72	-0.0793	0.0254	0.00176	-3.13	-0.121	0.0326	0.000207	-3.71
-0.0668	0.0113	0.00175	3.87e-09	-5.89	-0.15	0.0409	0.000246	-3.67	-0.0749	0.0185	4.99e-05	-4.06	-0.0312	0.0203	0.124	-1.54	-0.0739	0.0235	0.00164	-3.15
0.0433	0.00735	0.00178	3.94e-09	5.89	0.0932	0.024	0.000104	3.88	0.0406	0.0132	0.00219	3.06	0.0393	0.014	0.00497	2.81	0.0347	0.013	0.00733	2.68
-0.079	0.0134	0.00179	3.96e-09	-5.89	-0.26	0.0517	4.91e-07	-5.03	-0.0544	0.0207	0.00864	-2.63	-0.0675	0.0247	0.00621	-2.74	-0.0861	0.0288	0.00284	-2.98
0.0506	0.0086	0.0018	3.97e-09	5.89	0.0453	0.03	0.13	1.51	0.065	0.0153	2.12e-05	4.25	0.0358	0.0147	0.015	2.43	0.0541	0.0168	0.00132	3.21
-0.0592	0.0101	0.00182	4.03e-09	-5.88	-0.0782	0.0347	0.0241	-2.26	-0.0444	0.0157	0.00476	-2.82	-0.0925	0.0194	1.78e-06	-4.78	-0.0399	0.0206	0.0529	-1.94
0.0431	0.00734	0.00187	4.14e-09	5.88	0.036	0.0258	0.162	1.4	0.0672	0.0136	7.41e-07	4.95	0.0308	0.0125	0.0133	2.48	0.0353	0.0139	0.0109	2.55
0.0615	0.0105	0.0019	4.21e-09	5.88	0.0981	0.0346	0.00452	2.84	0.0784	0.0187	2.88e-05	4.18	0.032	0.0181	0.0769	1.77	0.066	0.0204	0.00121	3.24
-0.0854	0.0145	0.00191	4.21e-09	-5.88	-0.0734	0.0511	0.151	-1.44	-0.105	0.0252	3.22e-05	-4.16	-0.0726	0.0269	0.00697	-2.7	-0.0793	0.0267	0.00297	-2.97
-0.0319	0.00543	0.00192	4.25e-09	-5.87	-0.0474	0.019	0.0125	-2.5	-0.0168	0.00827	0.0422	-2.03	-0.0304	0.0103	0.00299	-2.97	-0.0592	0.0119	7.16e-07	-4.96
0.0548	0.00933	0.00193	4.27e-09	5.87	0.0932	0.0336	0.00548	2.78	0.0544	0.0155	0.000429	3.52	0.061	0.0161	0.000152	3.79	0.0327	0.0198	0.0979	1.66
-0.0669	0.0114	0.00195	4.31e-09	-5.87	-0.0942	0.0446	0.0347	-2.11	-0.0879	0.0187	2.45e-06	-4.71	-0.0334	0.02	0.0941	-1.67	-0.0722	0.0234	0.00204	-3.08
0.146	0.0249	0.00195	4.32e-09	5.87	0.213	0.0637	0.000832	3.34	0.182	0.047	0.000113	3.86	0.161	0.0481	0.000811	3.35	0.0656	0.0457	0.152	1.43
-0.0547	0.00932	0.00197	4.36e-09	-5.87	-0.062	0.031	0.0452	-2	-0.0851	0.0175	1.12e-06	-4.87	-0.029	0.0168	0.0841	-1.73	-0.0502	0.0165	0.00238	-3.04
0.0507	0.00864	0.00201	4.43e-09	5.87	0.0695	0.0374	0.0633	1.86	0.0689	0.0124	2.73e-08	5.56	0.0274	0.0159	0.0852	1.72	0.0328	0.0212	0.123	1.54
-0.0396	0.00676	0.00201	4.44e-09	-5.87	-0.0687	0.0264	0.00931	-2.6	-0.0388	0.0103	0.000154	-3.79	-0.0254	0.0117	0.03	-2.17	-0.0585	0.0165	0.000381	-3.55
0.0468	0.00799	0.00203	4.48e-09	5.87	0.115	0.0314	0.000249	3.66	0.0513	0.0144	0.000351	3.57	0.0184	0.0137	0.181	1.34	0.0603	0.0149	5.27e-05	4.04
-0.0668	0.0114	0.00207	4.58e-09	-5.86	-0.0755	0.0445	0.09	-1.7	-0.074	0.0173	1.93e-05	-4.27	-0.0641	0.0209	0.00219	-3.06	-0.0527	0.0251	0.0363	-2.09
-0.077	0.0131	0.00208	4.59e-09	-5.86	-0.176	0.042	2.78e-05	-4.19	-0.0931	0.0224	3.27e-05	-4.15	-0.0393	0.0235	0.0948	-1.67	-0.063	0.0265	0.0173	-2.38
0.0638	0.0109	0.0021	4.64e-09	5.86	0.183	0.0578	0.00152	3.17	0.0611	0.0146	2.93e-05	4.18	0.0542	0.0207	0.00875	2.62	0.0634	0.03	0.0346	2.11
0.0609	0.0104	0.0021	4.65e-09	5.86	0.0628	0.0421	0.135	1.49	0.0728	0.018	5.23e-05	4.05	0.0619	0.0182	0.000678	3.4	0.0452	0.0197	0.0216	2.3
0.0568	0.00971	0.00212	4.69e-09	5.86	0.154	0.0376	4.51e-05	4.08	0.0523	0.0156	0.000795	3.35	0.0436	0.0179	0.0151	2.43	0.0538	0.0193	0.0053	2.79
-0.0491	0.00838	0.00213	4.7e-09	-5.86	-0.00913	0.031	0.768	-0.295	-0.0393	0.0134	0.00337	-2.93	-0.0571	0.015	0.00014	-3.81	-0.0682	0.0178	0.000121	-3.84
-0.0856	0.0146	0.00219	4.83e-09	-5.85	-0.0608	0.0609	0.318	-0.999	-0.0568	0.0221	0.0101	-2.57	-0.0958	0.0277	0.000542	-3.46	-0.135	0.0307	1.14e-05	-4.39
-0.0412	0.00703	0.00219	4.84e-09	-5.85	-0.0484	0.025	0.0527	-1.94	-0.0395	0.0116	0.000647	-3.41	-0.0416	0.0128	0.00111	-3.26	-0.0408	0.0141	0.0039	-2.89
-0.0314	0.00537	0.00222	4.9e-09	-5.85	-0.0414	0.0239	0.0832	-1.73	-0.0281	0.00843	0.000852	-3.34	-0.0342	0.00958	0.00036	-3.57	-0.0313	0.0112	0.00527	-2.79
0.0617	0.0105	0.00222	4.91e-09	5.85	0.108	0.0415	0.00898	2.61	0.0702	0.0172	4.32e-05	4.09	0.0573	0.0191	0.0027	3	0.0423	0.0209	0.0428	2.03
-0.0375	0.00641	0.00226	4.99e-09	-5.85	-0.0221	0.0247	0.371	-0.895	-0.0397	0.0104	0.000127	-3.83	-0.0327	0.0113	0.00375	-2.9	-0.0449	0.0134	0.000809	-3.35
-0.0915	0.0157	0.00227	5.01e-09	-5.85	-0.185	0.0614	0.00262	-3.01	-0.0555	0.0254	0.0291	-2.18	-0.0664	0.0287	0.0206	-2.31	-0.15	0.0308	1.14e-06	-4.87
-0.0621	0.0106	0.00231	5.1e-09	-5.84	-0.0537	0.0399	0.178	-1.35	-0.0818	0.0192	2.02e-05	-4.26	-0.0523	0.0186	0.00498	-2.81	-0.0545	0.0195	0.00518	-2.8
0.0543	0.00928	0.00231	5.11e-09	5.84	0.176	0.0421	3.02e-05	4.17	0.0503	0.0131	0.000127	3.83	0.0348	0.0176	0.0476	1.98	0.0632	0.0224	0.00487	2.82
-0.0397	0.0068	0.00232	5.13e-09	-5.84	-0.0666	0.0265	0.0122	-2.51	-0.052	0.0106	8.32e-07	-4.93	-0.0343	0.0122	0.00488	-2.81	-0.0149	0.0149	0.315	-1.01
0.049	0.00839	0.00235	5.19e-09	5.84	0.0532	0.0292	0.0685	1.82	0.0566	0.0143	7.91e-05	3.95	0.0483	0.016	0.00255	3.02	0.0398	0.0153	0.00923	2.6
0.0649	0.0111	0.00239	5.28e-09	5.84	0.106	0.051	0.0375	2.08	0.0907	0.0182	6.42e-07	4.98	0.0504	0.0192	0.0087	2.62	0.0376	0.0224	0.0938	1.68
0.0634	0.0109	0.00241	5.32e-09	5.84	0.112	0.0355	0.00167	3.14	0.0685	0.0174	8.12e-05	3.94	0.0643	0.0208	0.00198	3.09	0.0356	0.022	0.106	1.62
-0.059	0.0101	0.00242	5.34e-09	-5.84	-0.0615	0.0426	0.148	-1.45	-0.0488	0.0154	0.00152	-3.17	-0.032	0.0199	0.107	-1.61	-0.104	0.0201	2.6e-07	-5.15
-0.0704	0.0121	0.00242	5.35e-09	-5.84	-0.0722	0.0412	0.0799	-1.75	-0.0831	0.0212	9.14e-05	-3.91	-0.08	0.0219	0.000267	-3.65	-0.0457	0.0225	0.0418	-2.04
-0.0587	0.0101	0.00246	5.44e-09	-5.83	-0.062	0.0411	0.131	-1.51	-0.0496	0.0151	0.001	-3.29	-0.0495	0.0189	0.0089	-2.62	-0.0888	0.0218	4.63e-05	-4.07
0.141	0.0241	0.00248	5.48e-09	5.83	0.205	0.0861	0.017	2.39	0.209	0.0382	4.61e-08	5.47	0.0375	0.0451	0.406	0.831	0.13	0.0498	0.0092	2.6
0.0718	0.0123	0.00252	5.57e-09	5.83	0.148	0.0549	0.00685	2.7	0.0561	0.0172	0.00111	3.26	0.0754	0.025	0.00257	3.01	0.089	0.028	0.00146	3.18
0.0284	0.00488	0.00253	5.59e-09	5.83	0.0314	0.0219	0.151	1.44	0.0247	0.00749	0.00095	3.3	0.0314	0.00907	0.000542	3.46	0.0308	0.01	0.00212	3.07
-0.0721	0.0124	0.00255	5.63e-09	-5.83	-0.229	0.0532	1.69e-05	-4.3	-0.0394	0.0174	0.024	-2.26	-0.0334	0.0257	0.195	-1.3	-0.153	0.027	1.48e-08	-5.66
-0.0567	0.00973	0.00255	5.64e-09	-5.83	-0.0633	0.0341	0.0636	-1.85	-0.0575	0.0156	0.00024	-3.67	-0.0689	0.019	0.000283	-3.63	-0.0418	0.0188	0.0263	-2.22
-0.0887	0.0152	0.00256	5.66e-09	-5.83	-0.0953	0.045	0.0343	-2.12	-0.0986	0.0281	0.00045	-3.51	-0.062	0.028	0.0271	-2.21	-0.103	0.0279	0.00023	-3.68
-0.0554	0.00952	0.00264	5.84e-09	-5.82	-0.0341	0.0414	0.41	-0.823	-0.0516	0.0145	0.000373	-3.56	-0.0555	0.0176	0.00162	-3.15	-0.0676	0.0201	0.000768	-3.36
-0.0412	0.00707	0.00264	5.84e-09	-5.82	-0.0644	0.03	0.032	-2.14	-0.0473	0.0113	2.67e-05	-4.2	-0.0289	0.0133	0.0294	-2.18	-0.0403	0.0137	0.00326	-2.94
0.0382	0.00657	0.00265	5.87e-09	5.82	0.0418	0.025	0.0943	1.67	0.0534	0.0124	1.57e-05	4.32	0.0209	0.0118	0.0757	1.78	0.0409	0.0113	0.000307	3.61
0.0467	0.00803	0.00267	5.89e-09	5.82	0.127	0.0485	0.00878	2.62	0.0355	0.0102	0.000516	3.47	0.0607	0.0164	0.000211	3.71	0.0589	0.0237	0.013	2.48
-0.0716	0.0123	0.00269	5.95e-09	-5.82	-0.0142	0.044	0.746	-0.324	-0.07	0.0205	0.000622	-3.42	-0.0585	0.0231	0.0112	-2.54	-0.103	0.0234	1.03e-05	-4.41
0.0395	0.00679	0.00271	5.98e-09	5.82	0.0809	0.0288	0.00497	2.81	0.0359	0.0117	0.00214	3.07	0.0306	0.0111	0.0059	2.75	0.0487	0.014	0.000484	3.49
-0.0873	0.015	0.00272	6.02e-09	-5.82	-0.177	0.0536	0.000929	-3.31	-0.118	0.0254	3.19e-06	-4.66	-0.0398	0.0266	0.134	-1.5	-0.0764	0.0298	0.0104	-2.56
0.058	0.00997	0.00274	6.05e-09	5.82	0.125	0.04	0.00174	3.13	0.0505	0.0178	0.00453	2.84	0.0391	0.0169	0.0204	2.32	0.0753	0.019	7.59e-05	3.96
-0.0781	0.0134	0.00274	6.05e-09	-5.82	-0.192	0.0543	0.000416	-3.53	-0.0817	0.0199	4.19e-05	-4.1	-0.0452	0.0248	0.0679	-1.83	-0.0838	0.0307	0.00635	-2.73
-0.0749	0.0129	0.00277	6.13e-09	-5.81	-0.15	0.0479	0.00174	-3.13	-0.0804	0.0212	0.000144	-3.8	-0.0421	0.0221	0.0562	-1.91	-0.0925	0.0278	0.000898	-3.32
-0.0697	0.012	0.00279	6.17e-09	-5.81	-0.0791	0.0355	0.0259	-2.23	-0.0946	0.0248	0.000135	-3.82	-0.049	0.0207	0.0183	-2.36	-0.0699	0.0213	0.00104	-3.28
0.0688	0.0118	0.00281	6.22e-09	5.81	0.0718	0.056	0.2	1.28	0.0746	0.0186	5.99e-05	4.01	0.0417	0.0208	0.0453	2	0.0966	0.0249	0.000105	3.88
0.0626	0.0108	0.00285	6.29e-09	5.81	0.0615	0.0392	0.117	1.57	0.0615	0.0187	0.00102	3.28	0.0541	0.0191	0.00467	2.83	0.0741	0.0205	0.00031	3.61
0.066	0.0114	0.00286	6.31e-09	5.81	0.0705	0.0479	0.141	1.47	0.0877	0.0176	6.44e-07	4.98	0.0559	0.0207	0.00689	2.7	0.0384	0.0239	0.108	1.61
0.0527	0.00909	0.00296	6.54e-09	5.8	0.0501	0.0377	0.184	1.33	0.0652	0.0166	8.33e-05	3.93	0.0458	0.0153	0.00274	3	0.0487	0.0169	0.004	2.88
-0.0479	0.00826	0.003	6.64e-09	-5.8	-0.0287	0.0296	0.333	-0.967	-0.0585	0.0144	4.67e-05	-4.07	-0.0327	0.0152	0.0312	-2.15	-0.0564	0.0152	0.000208	-3.71
0.0745	0.0128	0.00301	6.65e-09	5.8	0.032	0.0477	0.502	0.671	0.0665	0.023	0.00385	2.89	0.0814	0.0219	0.000205	3.71	0.0862	0.0246	0.000457	3.5
0.0364	0.00629	0.00314	6.95e-09	5.79	0.0223	0.0225	0.323	0.989	0.0406	0.011	0.000234	3.68	0.0442	0.0108	4.07e-05	4.1	0.0252	0.0125	0.0437	2.02
-0.051	0.00881	0.00316	6.97e-09	-5.79	-0.063	0.0325	0.0525	-1.94	-0.0416	0.016	0.00925	-2.6	-0.0511	0.0144	0.000403	-3.54	-0.0589	0.0176	0.000831	-3.34
-0.0736	0.0127	0.00317	7e-09	-5.79	-0.000748	0.0369	0.984	-0.0203	-0.0987	0.0233	2.23e-05	-4.24	-0.0647	0.0233	0.00537	-2.78	-0.0871	0.0239	0.000262	-3.65
0.0576	0.00995	0.00317	7.01e-09	5.79	0.144	0.0354	4.69e-05	4.07	0.0651	0.0159	4.23e-05	4.09	0.0178	0.0173	0.304	1.03	0.0745	0.0222	0.000816	3.35
0.0393	0.00679	0.00324	7.16e-09	5.79	0.0546	0.0244	0.0251	2.24	0.043	0.0118	0.000256	3.66	0.0411	0.0116	0.000394	3.54	0.027	0.0137	0.0493	1.97
0.0452	0.00782	0.00327	7.22e-09	5.79	0.151	0.0366	3.57e-05	4.13	0.0399	0.0107	0.000194	3.73	0.0399	0.0148	0.00692	2.7	0.0417	0.0208	0.0452	2
0.0768	0.0133	0.00331	7.3e-09	5.78	0.106	0.0341	0.00197	3.1	0.148	0.0314	2.31e-06	4.72	0.0257	0.0231	0.266	1.11	0.076	0.0228	0.000865	3.33
0.0654	0.0113	0.00338	7.46e-09	5.78	0.0973	0.0475	0.0403	2.05	0.0653	0.0171	0.000129	3.83	0.0396	0.0215	0.0651	1.84	0.0889	0.0237	0.000181	3.74
-0.0743	0.0129	0.00338	7.48e-09	-5.78	-0.0471	0.0478	0.324	-0.986	-0.0933	0.0216	1.64e-05	-4.31	-0.0462	0.0235	0.0493	-1.97	-0.0879	0.0245	0.00034	-3.58
-0.045	0.0078	0.00346	7.64e-09	-5.78	-0.087	0.0262	0.0009	-3.32	-0.0453	0.0151	0.00267	-3	-0.0368	0.0135	0.00644	-2.72	-0.0417	0.014	0.00285	-2.98
-0.0547	0.00948	0.00346	7.65e-09	-5.78	-0.0472	0.0322	0.143	-1.47	-0.0601	0.0152	7.81e-05	-3.95	-0.0359	0.0181	0.048	-1.98	-0.0696	0.0189	0.000229	-3.69
-0.0338	0.00585	0.00347	7.67e-09	-5.78	-0.014	0.0238	0.557	-0.587	-0.0301	0.00921	0.00109	-3.27	-0.0406	0.0113	0.000324	-3.6	-0.037	0.0113	0.00106	-3.27
0.0425	0.00735	0.00351	7.76e-09	5.77	0.075	0.0283	0.00792	2.66	0.0427	0.0119	0.000328	3.59	0.0364	0.0133	0.00611	2.74	0.0406	0.0149	0.00646	2.72
0.14	0.0243	0.00354	7.81e-09	5.77	0.0802	0.094	0.394	0.853	0.201	0.0391	2.8e-07	5.14	0.112	0.0474	0.0178	2.37	0.098	0.0457	0.032	2.14
-0.0545	0.00945	0.00357	7.89e-09	-5.77	-0.0745	0.0352	0.034	-2.12	-0.0422	0.0149	0.00457	-2.84	-0.0561	0.0176	0.00147	-3.18	-0.0673	0.0194	0.000502	-3.48
0.0455	0.00788	0.00358	7.91e-09	5.77	0.0696	0.025	0.00528	2.79	0.0513	0.0158	0.00117	3.25	0.0235	0.0147	0.109	1.6	0.0523	0.0131	6.35e-05	4
-0.0666	0.0115	0.00359	7.92e-09	-5.77	-0.146	0.0454	0.00134	-3.21	-0.0409	0.0171	0.0164	-2.4	-0.0774	0.0219	0.000418	-3.53	-0.0846	0.0257	0.001	-3.29
0.0655	0.0113	0.00359	7.93e-09	5.77	0.0637	0.0419	0.129	1.52	0.0715	0.02	0.000359	3.57	0.0401	0.0198	0.0429	2.02	0.0889	0.0215	3.6e-05	4.13
-0.0643	0.0111	0.0036	7.95e-09	-5.77	-0.0463	0.0441	0.294	-1.05	-0.0574	0.0203	0.00465	-2.83	-0.0861	0.0188	4.88e-06	-4.57	-0.0487	0.0208	0.0193	-2.34
0.104	0.0181	0.00362	7.99e-09	5.77	0.0583	0.0453	0.198	1.29	0.119	0.0385	0.00205	3.08	0.136	0.0313	1.38e-05	4.35	0.0816	0.0337	0.0153	2.42
-0.0367	0.00636	0.00367	8.11e-09	-5.77	-0.0594	0.0249	0.017	-2.39	-0.0294	0.01	0.0034	-2.93	-0.0373	0.0116	0.00125	-3.23	-0.0421	0.0132	0.00149	-3.18
-0.039	0.00676	0.00369	8.15e-09	-5.77	-0.0524	0.0238	0.0281	-2.2	-0.0254	0.011	0.0212	-2.3	-0.0332	0.0123	0.007	-2.7	-0.0631	0.0138	4.7e-06	-4.58
0.0641	0.0111	0.00371	8.2e-09	5.76	0.151	0.0434	0.000509	3.48	0.0944	0.0183	2.63e-07	5.15	0.0196	0.0189	0.298	1.04	0.0578	0.0238	0.015	2.43
0.0409	0.0071	0.00378	8.36e-09	5.76	0.0668	0.028	0.0168	2.39	0.0623	0.0116	7.67e-08	5.37	0.00757	0.0124	0.543	0.609	0.0456	0.0146	0.00177	3.13
-0.0575	0.00998	0.0038	8.39e-09	-5.76	-0.115	0.0424	0.00679	-2.71	-0.0378	0.016	0.0179	-2.37	-0.0618	0.0185	0.000853	-3.33	-0.0699	0.0194	0.000323	-3.6
0.0644	0.0112	0.0038	8.39e-09	5.76	0.12	0.0458	0.00894	2.61	0.0752	0.0182	3.51e-05	4.14	0.0579	0.02	0.00379	2.9	0.0429	0.0223	0.0548	1.92
-0.0434	0.00754	0.00386	8.53e-09	-5.76	-0.0851	0.0309	0.00583	-2.76	-0.0398	0.0132	0.00252	-3.02	-0.0511	0.013	8.59e-05	-3.93	-0.0293	0.0143	0.0401	-2.05
0.0647	0.0112	0.00391	8.63e-09	5.76	0.0799	0.0459	0.0816	1.74	0.0656	0.018	0.000273	3.64	0.0724	0.0199	0.00027	3.64	0.0486	0.0234	0.0377	2.08
-0.0466	0.0081	0.00399	8.82e-09	-5.75	-0.0177	0.03	0.556	-0.589	-0.0487	0.0138	0.000434	-3.52	-0.0474	0.0143	0.000917	-3.31	-0.0508	0.0158	0.00126	-3.22
0.0776	0.0135	0.004	8.84e-09	5.75	0.131	0.0421	0.00182	3.12	0.0906	0.0238	0.000144	3.8	0.0348	0.024	0.148	1.45	0.0925	0.0264	0.000467	3.5
-0.0711	0.0124	0.00404	8.92e-09	-5.75	-0.0483	0.0373	0.196	-1.29	-0.0637	0.0249	0.0106	-2.56	-0.0812	0.0214	0.000143	-3.8	-0.0743	0.0223	0.00086	-3.33
-0.0295	0.00512	0.00404	8.92e-09	-5.75	-0.00121	0.0182	0.947	-0.0666	-0.029	0.00908	0.00139	-3.2	-0.0258	0.00931	0.00557	-2.77	-0.0411	0.00936	1.13e-05	-4.39
-0.0624	0.0108	0.00405	8.94e-09	-5.75	-0.0875	0.0363	0.016	-2.41	-0.0415	0.0166	0.0122	-2.51	-0.0662	0.0201	0.000985	-3.29	-0.0919	0.0249	0.000222	-3.69
0.0435	0.00757	0.00405	8.95e-09	5.75	0.0394	0.0222	0.0758	1.78	0.0539	0.0144	0.000179	3.75	0.0356	0.0134	0.00802	2.65	0.044	0.0141	0.0018	3.12
0.0528	0.00919	0.00408	9.02e-09	5.75	0.119	0.0345	0.000596	3.43	0.0416	0.0159	0.0088	2.62	0.0329	0.0161	0.0408	2.05	0.0739	0.0178	3.26e-05	4.15
0.0734	0.0128	0.00427	9.43e-09	5.74	0.0952	0.0429	0.0265	2.22	0.0781	0.0261	0.00278	2.99	0.0793	0.0216	0.00024	3.67	0.0574	0.0226	0.011	2.54
0.0816	0.0142	0.0043	9.5e-09	5.74	0.102	0.0449	0.0235	2.26	0.0823	0.0279	0.00321	2.95	0.0605	0.0252	0.0165	2.4	0.0956	0.025	0.000134	3.82
-0.0975	0.017	0.00432	9.53e-09	-5.74	-0.158	0.0449	0.00045	-3.51	-0.101	0.0335	0.00253	-3.02	-0.0774	0.0303	0.0106	-2.56	-0.0863	0.0319	0.00673	-2.71
-0.0941	0.0164	0.00453	1e-08	-5.73	-0.109	0.0593	0.0651	-1.84	-0.0685	0.0251	0.0064	-2.73	-0.0946	0.0305	0.0019	-3.1	-0.141	0.0361	0.000101	-3.89
0.0595	0.0104	0.00455	1e-08	5.73	0.0851	0.0329	0.00975	2.58	0.0872	0.0206	2.21e-05	4.24	0.0471	0.0186	0.0115	2.53	0.0422	0.0179	0.0185	2.36
0.0549	0.00959	0.00462	1.02e-08	5.73	0.0474	0.0325	0.145	1.46	0.0576	0.0181	0.00143	3.19	0.0512	0.017	0.00255	3.02	0.0584	0.0172	0.00067	3.4
-0.102	0.0178	0.00467	1.03e-08	-5.73	-0.0688	0.0687	0.317	-1	-0.107	0.0299	0.000334	-3.59	-0.12	0.0317	0.000145	-3.8	-0.0812	0.0349	0.0198	-2.33
0.0395	0.0069	0.00467	1.03e-08	5.73	0.112	0.0266	2.35e-05	4.23	0.0447	0.0122	0.000249	3.66	0.017	0.0112	0.131	1.51	0.0478	0.0142	0.000795	3.35
-0.0916	0.016	0.00468	1.03e-08	-5.73	-0.0647	0.0678	0.34	-0.954	-0.0554	0.0247	0.0246	-2.25	-0.0901	0.0291	0.00199	-3.09	-0.169	0.034	6.35e-07	-4.98
-0.06	0.0105	0.00469	1.04e-08	-5.72	-0.107	0.0401	0.00767	-2.67	-0.0793	0.0178	8.3e-06	-4.46	-0.0364	0.0182	0.0454	-2	-0.0519	0.0209	0.013	-2.48
0.0503	0.00878	0.00469	1.04e-08	5.72	0.121	0.0315	0.000119	3.85	0.0414	0.0162	0.0103	2.56	0.0408	0.0154	0.00814	2.65	0.0508	0.0159	0.00145	3.18
-0.0569	0.00994	0.00471	1.04e-08	-5.72	-0.0869	0.0328	0.00812	-2.65	-0.0673	0.0181	0.000201	-3.72	-0.0463	0.0182	0.0111	-2.54	-0.0482	0.0179	0.00714	-2.69
0.0774	0.0135	0.00473	1.04e-08	5.72	0.066	0.0516	0.201	1.28	0.0984	0.0214	4.43e-06	4.59	0.0754	0.0257	0.00335	2.93	0.05	0.0267	0.0611	1.87
0.0785	0.0137	0.00473	1.04e-08	5.72	0.113	0.0505	0.0254	2.24	0.0675	0.0227	0.00289	2.98	0.0955	0.0261	0.000247	3.67	0.067	0.0257	0.00926	2.6
0.0469	0.00819	0.00477	1.05e-08	5.72	0.126	0.0358	0.000459	3.5	0.0382	0.0132	0.00389	2.89	0.0338	0.0142	0.0174	2.38	0.0621	0.017	0.000254	3.66
-0.0471	0.00824	0.0048	1.06e-08	-5.72	-0.0738	0.0357	0.0385	-2.07	-0.0368	0.0125	0.00317	-2.95	-0.0436	0.0159	0.00602	-2.75	-0.0638	0.0168	0.000142	-3.8
-0.058	0.0101	0.00487	1.08e-08	-5.72	-0.158	0.0414	0.000132	-3.82	-0.0484	0.0163	0.00296	-2.97	-0.0393	0.0187	0.0355	-2.1	-0.0702	0.0199	0.000428	-3.52
0.0618	0.0108	0.00488	1.08e-08	5.72	0.167	0.0388	1.72e-05	4.3	0.0529	0.0183	0.00387	2.89	0.0586	0.0196	0.00277	2.99	0.0467	0.0208	0.0249	2.24
-0.0453	0.00792	0.00493	1.09e-08	-5.72	-0.0391	0.0322	0.225	-1.21	-0.0251	0.0123	0.0412	-2.04	-0.0606	0.0143	2.41e-05	-4.22	-0.0639	0.0169	0.000157	-3.78
-0.126	0.022	0.00493	1.09e-08	-5.72	-0.0973	0.0801	0.224	-1.22	-0.0861	0.0341	0.0117	-2.52	-0.153	0.0406	0.000168	-3.76	-0.174	0.0472	0.000219	-3.7
0.0681	0.0119	0.00495	1.09e-08	5.72	0.0797	0.0466	0.0871	1.71	0.0812	0.019	1.95e-05	4.27	0.033	0.0214	0.124	1.54	0.0895	0.0247	0.000296	3.62
-0.0482	0.00844	0.00502	1.11e-08	-5.71	-0.0548	0.0325	0.0923	-1.68	-0.0503	0.0142	0.000412	-3.53	-0.0544	0.0146	0.000191	-3.73	-0.035	0.017	0.039	-2.06
-0.0973	0.017	0.00503	1.11e-08	-5.71	-0.12	0.0701	0.0865	-1.71	-0.0627	0.026	0.016	-2.41	-0.141	0.0315	7.59e-06	-4.48	-0.1	0.0362	0.00561	-2.77
-0.0711	0.0124	0.00507	1.12e-08	-5.71	-0.0794	0.044	0.0712	-1.8	-0.0592	0.0196	0.00248	-3.03	-0.0778	0.0239	0.00116	-3.25	-0.0805	0.0251	0.00134	-3.21
0.0427	0.00749	0.00509	1.12e-08	5.71	0.0328	0.0345	0.342	0.951	0.0361	0.0124	0.00359	2.91	0.0392	0.0124	0.0016	3.16	0.061	0.0157	0.000103	3.88
-0.059	0.0103	0.0051	1.13e-08	-5.71	-0.0314	0.036	0.384	-0.871	-0.0558	0.019	0.00336	-2.93	-0.0597	0.018	0.000936	-3.31	-0.069	0.019	0.000281	-3.63
-0.0469	0.00822	0.00517	1.14e-08	-5.71	0.00187	0.0315	0.953	0.0594	-0.0438	0.013	0.000749	-3.37	-0.0648	0.0148	1.28e-05	-4.36	-0.0429	0.0173	0.0133	-2.48
-0.068	0.0119	0.00519	1.15e-08	-5.71	-0.0357	0.0451	0.429	-0.792	-0.0675	0.022	0.00213	-3.07	-0.0476	0.0202	0.0184	-2.36	-0.101	0.0222	5.31e-06	-4.55
0.0433	0.00759	0.00525	1.16e-08	5.71	0.0787	0.025	0.00167	3.14	0.0368	0.013	0.00468	2.83	0.0299	0.0139	0.0317	2.15	0.0541	0.0146	0.000205	3.71
-0.0448	0.00785	0.00525	1.16e-08	-5.71	-0.0162	0.0252	0.519	-0.644	-0.028	0.015	0.0615	-1.87	-0.0456	0.0143	0.00147	-3.18	-0.0665	0.0137	1.21e-06	-4.85
-0.069	0.0121	0.00527	1.16e-08	-5.7	-0.101	0.0468	0.0308	-2.16	-0.0786	0.0205	0.000124	-3.84	-0.0296	0.0216	0.17	-1.37	-0.0946	0.0233	4.84e-05	-4.06
-0.0676	0.0119	0.00536	1.18e-08	-5.7	-0.132	0.0519	0.011	-2.54	-0.051	0.0169	0.00256	-3.02	-0.0834	0.0234	0.000363	-3.57	-0.0713	0.0266	0.00721	-2.69
0.0378	0.00662	0.00539	1.19e-08	5.7	0.0553	0.0211	0.00878	2.62	0.0456	0.0125	0.000278	3.64	0.031	0.0119	0.00925	2.6	0.032	0.0118	0.00693	2.7
0.0864	0.0152	0.00541	1.19e-08	5.7	0.124	0.0566	0.028	2.2	0.0686	0.0244	0.00487	2.82	0.0885	0.027	0.00106	3.27	0.102	0.0319	0.00137	3.2
-0.0801	0.014	0.00544	1.2e-08	-5.7	-0.152	0.0502	0.00243	-3.03	-0.0726	0.0218	0.000873	-3.33	-0.0938	0.0276	0.000676	-3.4	-0.0553	0.0282	0.0497	-1.96
-0.0496	0.00871	0.00545	1.2e-08	-5.7	-0.0382	0.0313	0.222	-1.22	-0.0571	0.0147	9.71e-05	-3.9	-0.0344	0.0152	0.0239	-2.26	-0.0629	0.0177	0.000376	-3.56
0.0673	0.0118	0.00558	1.23e-08	5.7	0.0614	0.043	0.153	1.43	0.0805	0.0198	4.7e-05	4.07	0.0794	0.0204	9.76e-05	3.9	0.0313	0.0246	0.204	1.27
-0.16	0.028	0.00561	1.24e-08	-5.69	-0.118	0.0974	0.225	-1.21	-0.142	0.0427	0.000856	-3.33	-0.193	0.0514	0.000173	-3.76	-0.164	0.0644	0.0107	-2.55
-0.0542	0.00952	0.00566	1.25e-08	-5.69	-0.103	0.0408	0.0113	-2.53	-0.0365	0.0154	0.0182	-2.36	-0.0782	0.017	4.34e-06	-4.59	-0.0406	0.0189	0.0323	-2.14
-0.0498	0.00874	0.0057	1.26e-08	-5.69	-0.0533	0.0293	0.0687	-1.82	-0.0454	0.0142	0.00136	-3.2	-0.0488	0.0163	0.00276	-2.99	-0.0563	0.0177	0.00148	-3.18
-0.0438	0.00769	0.00573	1.26e-08	-5.69	-0.0526	0.0252	0.0368	-2.09	-0.0407	0.0152	0.00748	-2.67	-0.0387	0.014	0.00565	-2.77	-0.0481	0.013	0.000224	-3.69
-0.0454	0.00799	0.00574	1.27e-08	-5.69	-0.0444	0.0313	0.156	-1.42	-0.04	0.0122	0.000987	-3.29	-0.0518	0.0145	0.000357	-3.57	-0.0478	0.0178	0.00737	-2.68
0.0534	0.00938	0.00576	1.27e-08	5.69	0.0651	0.0356	0.0675	1.83	0.0409	0.0158	0.00962	2.59	0.061	0.0175	0.000494	3.48	0.0581	0.0174	0.000826	3.34
0.0337	0.00593	0.00578	1.28e-08	5.69	0.086	0.0205	2.81e-05	4.19	0.0304	0.011	0.00591	2.75	0.0213	0.0101	0.0341	2.12	0.037	0.0112	0.000944	3.31
-0.0475	0.00836	0.00578	1.28e-08	-5.69	-0.0523	0.031	0.0918	-1.69	-0.0418	0.0126	0.000909	-3.32	-0.0496	0.0166	0.00288	-2.98	-0.0547	0.0172	0.00152	-3.17
-0.0515	0.00905	0.00587	1.3e-08	-5.69	-0.0701	0.0305	0.0217	-2.3	-0.0693	0.0165	2.68e-05	-4.2	-0.0311	0.0161	0.0528	-1.94	-0.0496	0.0167	0.00294	-2.97
0.0764	0.0134	0.00588	1.3e-08	5.69	0.0958	0.0541	0.0766	1.77	0.102	0.0211	1.42e-06	4.82	0.0504	0.0244	0.0389	2.07	0.0606	0.0279	0.0298	2.17
0.0819	0.0144	0.00591	1.31e-08	5.69	0.105	0.0499	0.0345	2.11	0.115	0.0283	4.83e-05	4.06	0.07	0.0258	0.00675	2.71	0.0622	0.0245	0.0111	2.54
0.0555	0.00976	0.00593	1.31e-08	5.68	0.12	0.0346	0.000508	3.48	0.057	0.0182	0.00168	3.14	0.0339	0.0168	0.0435	2.02	0.0611	0.018	0.000677	3.4
-0.0411	0.00724	0.00598	1.32e-08	-5.68	-0.0532	0.0258	0.0387	-2.07	-0.0392	0.012	0.00105	-3.28	-0.0328	0.0131	0.0121	-2.51	-0.0505	0.0145	0.000511	-3.47
-0.0314	0.00552	0.00599	1.32e-08	-5.68	-0.0184	0.0242	0.446	-0.761	-0.0269	0.00858	0.00169	-3.14	-0.0351	0.00969	0.000292	-3.62	-0.0374	0.012	0.00186	-3.11
-0.0835	0.0147	0.00604	1.34e-08	-5.68	-0.149	0.0672	0.0264	-2.22	-0.106	0.0233	6e-06	-4.53	-0.0374	0.0273	0.17	-1.37	-0.089	0.0285	0.00182	-3.12
-0.0821	0.0145	0.00612	1.35e-08	-5.68	-0.123	0.0505	0.0149	-2.43	-0.0524	0.0217	0.0159	-2.41	-0.0836	0.0271	0.00204	-3.08	-0.131	0.033	7.45e-05	-3.96
0.0555	0.00977	0.00619	1.37e-08	5.68	0.0862	0.0446	0.0529	1.94	0.0528	0.0142	0.000197	3.72	0.0497	0.0178	0.00532	2.79	0.064	0.0232	0.00579	2.76
-0.0762	0.0134	0.00637	1.41e-08	-5.67	-0.0203	0.0459	0.658	-0.442	-0.0684	0.0221	0.00199	-3.09	-0.0696	0.0246	0.00471	-2.83	-0.115	0.0269	2.04e-05	-4.26
-0.0597	0.0105	0.00646	1.43e-08	-5.67	-0.0928	0.0393	0.0182	-2.36	-0.0483	0.0154	0.00175	-3.13	-0.0598	0.0203	0.0032	-2.95	-0.0747	0.0239	0.00181	-3.12
-0.038	0.0067	0.00649	1.43e-08	-5.67	-0.000847	0.0263	0.974	-0.0322	-0.0332	0.0108	0.00204	-3.08	-0.0491	0.0117	2.83e-05	-4.19	-0.041	0.0143	0.00413	-2.87
0.0391	0.0069	0.00661	1.46e-08	5.67	0.111	0.0287	0.000101	3.89	0.046	0.0113	4.27e-05	4.09	0.0123	0.0118	0.295	1.05	0.05	0.0147	0.000656	3.41
-0.0654	0.0115	0.00669	1.48e-08	-5.66	-0.0436	0.0495	0.378	-0.881	-0.0588	0.0179	0.00104	-3.28	-0.0416	0.0215	0.0533	-1.93	-0.11	0.0234	2.81e-06	-4.68
-0.0792	0.014	0.00681	1.5e-08	-5.66	-0.0155	0.0526	0.768	-0.296	-0.0668	0.0236	0.00463	-2.83	-0.0641	0.0271	0.018	-2.36	-0.12	0.025	1.53e-06	-4.81
-0.043	0.0076	0.00684	1.51e-08	-5.66	-0.035	0.0273	0.2	-1.28	-0.0428	0.0124	0.000563	-3.45	-0.0314	0.014	0.0248	-2.25	-0.0593	0.0151	8.7e-05	-3.92
0.0665	0.0118	0.00701	1.55e-08	5.66	0.124	0.0442	0.00505	2.8	0.0651	0.0203	0.00132	3.21	0.072	0.0203	0.000396	3.54	0.0454	0.0232	0.0497	1.96
-0.0523	0.00925	0.00702	1.55e-08	-5.66	-0.0525	0.0298	0.0784	-1.76	-0.0524	0.0167	0.00171	-3.14	-0.0563	0.0165	0.000653	-3.41	-0.0478	0.0174	0.00598	-2.75
-0.0512	0.00905	0.00709	1.57e-08	-5.65	-0.0807	0.0348	0.0204	-2.32	-0.0601	0.0155	0.000105	-3.88	-0.0281	0.0157	0.0723	-1.8	-0.0615	0.0179	0.000567	-3.45
-0.0322	0.0057	0.00709	1.57e-08	-5.65	-0.027	0.0208	0.194	-1.3	-0.0183	0.00958	0.0562	-1.91	-0.0364	0.00998	0.000259	-3.65	-0.0485	0.0115	2.68e-05	-4.2
-0.0569	0.0101	0.00712	1.57e-08	-5.65	-0.0747	0.0347	0.0316	-2.15	-0.0634	0.0178	0.000357	-3.57	-0.0315	0.0177	0.075	-1.78	-0.0739	0.0193	0.000128	-3.83
0.105	0.0185	0.00713	1.58e-08	5.65	0.183	0.0628	0.00356	2.91	0.13	0.0307	2.47e-05	4.22	0.0442	0.0339	0.193	1.3	0.113	0.0367	0.00214	3.07
0.0646	0.0114	0.00716	1.58e-08	5.65	0.161	0.0571	0.00493	2.81	0.0513	0.0164	0.00176	3.13	0.052	0.0225	0.0208	2.31	0.0916	0.0245	0.00019	3.73
-0.0545	0.00964	0.00716	1.58e-08	-5.65	-0.0948	0.041	0.0209	-2.31	-0.05	0.0151	0.000937	-3.31	-0.052	0.0177	0.00334	-2.93	-0.056	0.0196	0.00434	-2.85
0.0441	0.00781	0.00739	1.63e-08	5.65	0.0969	0.0296	0.00106	3.28	0.0415	0.0136	0.00227	3.05	0.0414	0.0145	0.00419	2.86	0.0374	0.014	0.0076	2.67
0.061	0.0108	0.00742	1.64e-08	5.65	0.134	0.0482	0.00548	2.78	0.0529	0.0153	0.000525	3.47	0.0498	0.0211	0.0182	2.36	0.0787	0.025	0.00164	3.15
0.152	0.027	0.00746	1.65e-08	5.65	0.0517	0.0862	0.549	0.599	0.153	0.0428	0.000342	3.58	0.106	0.0535	0.0471	1.99	0.236	0.0538	1.12e-05	4.39
0.0487	0.00863	0.00748	1.65e-08	5.65	0.0947	0.0347	0.00631	2.73	0.0593	0.0155	0.000126	3.83	0.042	0.0147	0.00425	2.86	0.0352	0.0163	0.0307	2.16
-0.0429	0.0076	0.0075	1.66e-08	-5.64	-0.0618	0.0258	0.0166	-2.4	-0.0474	0.0121	9.43e-05	-3.9	-0.0273	0.013	0.0357	-2.1	-0.0534	0.0179	0.00285	-2.98
-0.063	0.0112	0.00765	1.69e-08	-5.64	-0.0336	0.0371	0.366	-0.904	-0.0747	0.0196	0.00014	-3.81	-0.0764	0.0203	0.000164	-3.77	-0.0446	0.021	0.034	-2.12
-0.0391	0.00694	0.00782	1.73e-08	-5.64	-0.0428	0.022	0.0519	-1.94	-0.0372	0.0108	0.000584	-3.44	-0.0339	0.0132	0.00996	-2.58	-0.0479	0.0151	0.0015	-3.18
0.0835	0.0148	0.00784	1.73e-08	5.64	0.123	0.0653	0.059	1.89	0.11	0.0219	4.82e-07	5.03	0.0424	0.0274	0.122	1.55	0.0722	0.0333	0.0302	2.17
0.0496	0.0088	0.00791	1.75e-08	5.64	0.0812	0.0299	0.00657	2.72	0.059	0.0153	0.000112	3.86	0.0475	0.0158	0.00261	3.01	0.0303	0.0169	0.0731	1.79
-0.172	0.0305	0.008	1.77e-08	-5.63	-0.132	0.0983	0.18	-1.34	-0.143	0.0529	0.00694	-2.7	-0.203	0.054	0.000171	-3.76	-0.186	0.0606	0.00219	-3.06
0.0533	0.00947	0.00803	1.78e-08	5.63	0.154	0.0376	4.15e-05	4.1	0.0503	0.0161	0.00175	3.13	0.0362	0.0155	0.0197	2.33	0.058	0.0203	0.00423	2.86
0.0628	0.0111	0.0081	1.79e-08	5.63	0.0121	0.0386	0.754	0.314	0.0426	0.0186	0.0217	2.3	0.0941	0.0211	8.27e-06	4.46	0.0726	0.0212	0.000597	3.43
-0.0835	0.0148	0.00814	1.8e-08	-5.63	-0.066	0.0454	0.146	-1.45	-0.102	0.0246	3.19e-05	-4.16	-0.069	0.0274	0.012	-2.51	-0.0808	0.0305	0.00819	-2.64
-0.0572	0.0102	0.00824	1.82e-08	-5.63	-0.00358	0.0425	0.933	-0.0843	-0.0361	0.0161	0.0248	-2.24	-0.0633	0.0183	0.00054	-3.46	-0.0975	0.0209	3.03e-06	-4.67
-0.0634	0.0113	0.00824	1.82e-08	-5.63	-0.048	0.0453	0.289	-1.06	-0.0649	0.0173	0.000175	-3.75	-0.0772	0.0218	0.000399	-3.54	-0.0498	0.0227	0.0282	-2.19
-0.0538	0.00956	0.00833	1.84e-08	-5.63	-0.08	0.0374	0.0322	-2.14	-0.0543	0.0149	0.000266	-3.65	-0.0699	0.018	0.000105	-3.88	-0.027	0.0195	0.166	-1.38
-0.0546	0.00971	0.00837	1.85e-08	-5.63	-0.0721	0.034	0.034	-2.12	-0.0606	0.0173	0.000463	-3.5	-0.0656	0.0187	0.000439	-3.52	-0.0358	0.0168	0.0335	-2.13
0.0609	0.0108	0.0085	1.88e-08	5.62	0.125	0.035	0.000358	3.57	0.0521	0.0201	0.00964	2.59	0.0599	0.0204	0.00324	2.94	0.0509	0.0188	0.0068	2.71
-0.0566	0.0101	0.00859	1.9e-08	-5.62	-0.109	0.0396	0.00601	-2.75	-0.0635	0.0167	0.000141	-3.81	-0.0269	0.0176	0.127	-1.53	-0.0719	0.0203	0.000398	-3.54
-0.0479	0.00853	0.0087	1.92e-08	-5.62	-0.00971	0.0334	0.771	-0.291	-0.0352	0.0137	0.0103	-2.56	-0.0512	0.0147	0.000494	-3.48	-0.0775	0.0185	2.82e-05	-4.19
0.069	0.0123	0.0088	1.95e-08	5.62	0.14	0.0493	0.00455	2.84	0.0701	0.0184	0.000136	3.82	0.0607	0.025	0.015	2.43	0.0575	0.0247	0.0199	2.33
0.0719	0.0128	0.00892	1.97e-08	5.61	0.0971	0.0426	0.0228	2.28	0.0762	0.0219	0.000515	3.47	0.0772	0.0242	0.00141	3.19	0.0539	0.0239	0.024	2.26
-0.0375	0.00669	0.00928	2.05e-08	-5.61	-0.0668	0.0243	0.00602	-2.75	-0.0444	0.0111	6.48e-05	-3.99	-0.0175	0.0111	0.115	-1.58	-0.0503	0.015	0.000792	-3.36
0.0673	0.012	0.00929	2.05e-08	5.61	0.103	0.0399	0.00996	2.58	0.0891	0.0231	0.000117	3.85	0.0631	0.0207	0.00225	3.06	0.042	0.0218	0.0545	1.92
0.0707	0.0126	0.00932	2.06e-08	5.61	0.132	0.0469	0.00474	2.82	0.0837	0.0209	6.04e-05	4.01	0.0381	0.0233	0.102	1.63	0.072	0.0243	0.00306	2.96
-0.0515	0.00919	0.00933	2.06e-08	-5.61	-0.101	0.0387	0.00891	-2.62	-0.0646	0.0157	3.7e-05	-4.13	-0.0291	0.0166	0.0795	-1.75	-0.05	0.017	0.00322	-2.95
0.134	0.0239	0.00955	2.11e-08	5.6	0.21	0.0807	0.00914	2.61	0.193	0.0409	2.32e-06	4.72	0.0885	0.0448	0.0479	1.98	0.085	0.0449	0.0585	1.89
-0.0491	0.00876	0.0097	2.14e-08	-5.6	-0.0868	0.0374	0.0204	-2.32	-0.0531	0.0144	0.000238	-3.67	-0.0482	0.0155	0.00193	-3.1	-0.0365	0.0172	0.034	-2.12
-0.045	0.00803	0.00976	2.16e-08	-5.6	-0.0186	0.0307	0.544	-0.607	-0.0294	0.0116	0.0111	-2.54	-0.0603	0.0157	0.000122	-3.84	-0.0727	0.0185	8.15e-05	-3.94
0.0507	0.00906	0.00981	2.17e-08	5.6	0.0929	0.0373	0.0128	2.49	0.0575	0.0135	1.88e-05	4.28	0.0286	0.0169	0.0916	1.69	0.0543	0.0201	0.00704	2.69
-0.0514	0.00918	0.00982	2.17e-08	-5.6	-0.0848	0.033	0.0102	-2.57	-0.0557	0.0217	0.0104	-2.56	-0.0356	0.0158	0.0245	-2.25	-0.0563	0.0144	9.21e-05	-3.91
0.0582	0.0104	0.00992	2.19e-08	5.6	0.0511	0.0319	0.108	1.61	0.09	0.0186	1.34e-06	4.83	0.0398	0.0189	0.035	2.11	0.0453	0.0197	0.0216	2.3
-0.0407	0.00727	0.00992	2.19e-08	-5.6	-0.0397	0.0254	0.118	-1.56	-0.0576	0.0139	3.3e-05	-4.15	-0.0317	0.0122	0.00958	-2.59	-0.036	0.0135	0.00783	-2.66
-0.0551	0.00984	0.00997	2.2e-08	-5.6	-0.0525	0.0345	0.128	-1.52	-0.0569	0.0163	0.000469	-3.5	-0.0608	0.0178	0.000633	-3.42	-0.046	0.0198	0.0201	-2.33
0.0391	0.00699	0.01	2.21e-08	5.59	0.0969	0.0273	0.000393	3.54	0.0424	0.0112	0.000162	3.77	0.0299	0.0125	0.0171	2.38	0.0298	0.0143	0.0373	2.08
0.0714	0.0128	0.01	2.22e-08	5.59	0.128	0.0466	0.00619	2.74	0.106	0.022	1.49e-06	4.81	0.0493	0.0226	0.0294	2.18	0.0388	0.0246	0.115	1.58
-0.0425	0.0076	0.0101	2.23e-08	-5.59	-0.00755	0.0239	0.752	-0.315	-0.0464	0.0144	0.00121	-3.24	-0.0636	0.0138	3.92e-06	-4.62	-0.0298	0.0135	0.0276	-2.2
0.0539	0.00964	0.0101	2.23e-08	5.59	0.0832	0.0394	0.0348	2.11	0.0672	0.017	7.75e-05	3.95	0.0544	0.017	0.00142	3.19	0.0333	0.0176	0.0591	1.89
-0.0355	0.00635	0.0101	2.24e-08	-5.59	-0.0486	0.0278	0.08	-1.75	-0.0364	0.00948	0.000121	-3.84	-0.0238	0.0125	0.0568	-1.9	-0.0438	0.013	0.00076	-3.37
0.11	0.0197	0.0101	2.24e-08	5.59	0.151	0.0912	0.097	1.66	0.152	0.0315	1.44e-06	4.82	0.0597	0.0347	0.0849	1.72	0.103	0.0405	0.0112	2.54
0.05	0.00895	0.0103	2.28e-08	5.59	0.0677	0.037	0.0671	1.83	0.0373	0.0136	0.00622	2.74	0.0625	0.0164	0.000135	3.82	0.0533	0.0194	0.00602	2.75
-0.0759	0.0136	0.0103	2.28e-08	-5.59	-0.0906	0.053	0.0873	-1.71	-0.0938	0.0226	3.22e-05	-4.16	-0.0974	0.0251	0.000101	-3.89	-0.0265	0.0257	0.303	-1.03
-0.0402	0.00719	0.0103	2.29e-08	-5.59	-0.0227	0.0266	0.394	-0.852	-0.0391	0.0129	0.0025	-3.02	-0.0271	0.0124	0.0294	-2.18	-0.0613	0.0135	5.62e-06	-4.54
-0.0501	0.00897	0.0104	2.29e-08	-5.59	-0.045	0.0309	0.145	-1.46	-0.048	0.0144	0.000873	-3.33	-0.0565	0.0176	0.00133	-3.21	-0.0486	0.0173	0.00488	-2.81
-0.064	0.0115	0.0106	2.34e-08	-5.58	-0.113	0.0537	0.0358	-2.1	-0.018	0.0166	0.277	-1.09	-0.0901	0.0215	2.67e-05	-4.2	-0.128	0.0261	1.05e-06	-4.88
0.0595	0.0106	0.0106	2.35e-08	5.58	0.111	0.0437	0.0108	2.55	0.0699	0.0169	3.57e-05	4.13	0.0261	0.0191	0.171	1.37	0.0729	0.022	0.000938	3.31
-0.0797	0.0143	0.0108	2.39e-08	-5.58	-0.0511	0.0449	0.256	-1.14	-0.0669	0.0205	0.0011	-3.26	-0.109	0.0275	7.72e-05	-3.95	-0.0889	0.0378	0.0187	-2.35
-0.037	0.00663	0.0109	2.41e-08	-5.58	-0.0399	0.0234	0.088	-1.71	-0.054	0.0123	1.17e-05	-4.38	-0.0316	0.0118	0.0074	-2.68	-0.026	0.0118	0.0279	-2.2
-0.043	0.0077	0.011	2.42e-08	-5.58	-0.0291	0.0277	0.293	-1.05	-0.0388	0.0121	0.00131	-3.21	-0.0384	0.0136	0.00462	-2.83	-0.0649	0.0175	0.000213	-3.7
0.0666	0.0119	0.0111	2.46e-08	5.58	0.201	0.0515	9.91e-05	3.89	0.0493	0.0164	0.0027	3	0.0474	0.0238	0.0466	1.99	0.107	0.0293	0.000247	3.66
-0.0694	0.0125	0.0112	2.48e-08	-5.57	-0.063	0.0357	0.0773	-1.77	-0.0764	0.0196	9.79e-05	-3.9	-0.051	0.0246	0.0386	-2.07	-0.0817	0.0266	0.00213	-3.07
-0.0794	0.0143	0.0117	2.59e-08	-5.57	-0.0363	0.0513	0.479	-0.708	-0.096	0.0235	4.47e-05	-4.08	-0.0795	0.0265	0.00271	-3	-0.0689	0.0277	0.0129	-2.49
-0.062	0.0111	0.0117	2.59e-08	-5.57	-0.137	0.0481	0.00449	-2.84	-0.0751	0.0179	2.84e-05	-4.19	-0.0363	0.0192	0.0589	-1.89	-0.0604	0.0236	0.0104	-2.56
-0.101	0.0181	0.0118	2.61e-08	-5.57	-0.0694	0.0632	0.272	-1.1	-0.0945	0.0293	0.00125	-3.23	-0.139	0.0347	6.21e-05	-4	-0.0796	0.035	0.0228	-2.28
0.0247	0.00444	0.012	2.65e-08	5.56	0.0311	0.0186	0.0954	1.67	0.0242	0.00681	0.000378	3.56	0.0215	0.00796	0.0069	2.7	0.0286	0.00971	0.00323	2.94
-0.0402	0.00724	0.0122	2.69e-08	-5.56	-0.0684	0.024	0.00432	-2.85	-0.0144	0.012	0.232	-1.2	-0.0467	0.0133	0.000446	-3.51	-0.0595	0.0144	3.67e-05	-4.13
-0.0802	0.0144	0.0124	2.73e-08	-5.56	-0.169	0.0559	0.00256	-3.02	-0.0615	0.0224	0.00601	-2.75	-0.0803	0.0286	0.00508	-2.8	-0.0874	0.0281	0.00188	-3.11
-0.042	0.00756	0.0124	2.74e-08	-5.56	-0.0927	0.0305	0.00239	-3.04	-0.0385	0.0118	0.00111	-3.26	-0.0419	0.0139	0.00256	-3.02	-0.0349	0.0156	0.0255	-2.23
0.0384	0.00691	0.0125	2.76e-08	5.56	0.129	0.025	2.56e-07	5.15	0.0386	0.0131	0.00324	2.94	0.0209	0.0115	0.0698	1.81	0.0362	0.013	0.00528	2.79
-0.0493	0.00887	0.0126	2.79e-08	-5.55	-0.0868	0.0305	0.00437	-2.85	-0.0137	0.0158	0.386	-0.866	-0.0562	0.0159	0.000405	-3.54	-0.0699	0.0165	2.41e-05	-4.22
-0.0373	0.00671	0.0126	2.79e-08	-5.55	-0.0548	0.0262	0.0365	-2.09	-0.0351	0.0112	0.00176	-3.13	-0.0374	0.0121	0.00198	-3.09	-0.0358	0.013	0.00577	-2.76
0.141	0.0254	0.0126	2.79e-08	5.55	0.261	0.0928	0.00489	2.81	0.183	0.0414	1.05e-05	4.41	0.0573	0.0468	0.221	1.22	0.142	0.0504	0.00494	2.81
0.0446	0.00803	0.0127	2.82e-08	5.55	0.116	0.0397	0.00353	2.92	0.0363	0.0113	0.00128	3.22	0.0363	0.0159	0.0228	2.28	0.0616	0.018	0.000632	3.42
-0.0393	0.00709	0.0128	2.83e-08	-5.55	-0.0383	0.0208	0.0646	-1.85	-0.0351	0.0126	0.00538	-2.78	-0.0433	0.0133	0.00112	-3.26	-0.0405	0.0133	0.00235	-3.04
0.0536	0.00967	0.0131	2.89e-08	5.55	0.0826	0.0319	0.00961	2.59	0.0601	0.0192	0.00169	3.14	0.044	0.0175	0.0119	2.51	0.0497	0.0164	0.00243	3.03
0.0483	0.0087	0.0131	2.9e-08	5.55	0.0736	0.0297	0.0133	2.48	0.0456	0.0152	0.00269	3	0.037	0.0163	0.0234	2.27	0.0545	0.0158	0.000566	3.45
0.0398	0.00717	0.0132	2.91e-08	5.55	0.0567	0.0241	0.0188	2.35	0.0538	0.0123	1.32e-05	4.36	0.0239	0.0126	0.0584	1.89	0.0354	0.0143	0.0132	2.48
-0.0664	0.012	0.0132	2.92e-08	-5.55	-0.136	0.0422	0.00123	-3.23	-0.0547	0.0206	0.00803	-2.65	-0.065	0.0219	0.00299	-2.97	-0.062	0.0225	0.00587	-2.75
0.0703	0.0127	0.0134	2.95e-08	5.54	0.0658	0.0409	0.108	1.61	0.108	0.023	2.72e-06	4.69	0.0509	0.0224	0.0231	2.27	0.0531	0.0239	0.0261	2.22
-0.023	0.00416	0.0134	2.95e-08	-5.54	-0.0151	0.0166	0.365	-0.906	-0.0173	0.00656	0.00851	-2.63	-0.0261	0.00742	0.000429	-3.52	-0.0314	0.00881	0.000371	-3.56
0.0488	0.0088	0.0135	2.98e-08	5.54	0.215	0.0432	6.13e-07	4.99	0.0429	0.012	0.000365	3.56	0.0211	0.0172	0.22	1.23	0.0707	0.022	0.00129	3.22
-0.0531	0.00958	0.0136	3e-08	-5.54	0.000809	0.0369	0.982	0.0219	-0.0445	0.0153	0.00352	-2.92	-0.0511	0.0178	0.00409	-2.87	-0.0834	0.0192	1.37e-05	-4.35
-0.0819	0.0148	0.0136	3.01e-08	-5.54	-0.181	0.056	0.00125	-3.23	-0.0652	0.0234	0.00538	-2.78	-0.0686	0.028	0.0144	-2.45	-0.0956	0.0293	0.00113	-3.26
0.0596	0.0108	0.0137	3.02e-08	5.54	0.119	0.0386	0.00208	3.08	0.087	0.018	1.26e-06	4.85	0.0232	0.0186	0.213	1.25	0.0497	0.0225	0.0271	2.21
0.101	0.0182	0.0139	3.07e-08	5.54	0.203	0.0725	0.0051	2.8	0.0661	0.0267	0.0135	2.47	0.126	0.0344	0.000253	3.66	0.113	0.041	0.00576	2.76
-0.0603	0.0109	0.0142	3.14e-08	-5.53	-0.0321	0.0347	0.355	-0.926	-0.0562	0.0207	0.00673	-2.71	-0.0597	0.0189	0.00161	-3.15	-0.0743	0.0201	0.000219	-3.7
-0.0327	0.00591	0.0142	3.14e-08	-5.53	-0.0762	0.0225	0.000712	-3.38	-0.0397	0.0104	0.000128	-3.83	-0.0211	0.00974	0.0306	-2.16	-0.0285	0.0121	0.0183	-2.36
-0.0718	0.013	0.0142	3.14e-08	-5.53	-0.0618	0.0481	0.199	-1.28	-0.0451	0.0209	0.0314	-2.15	-0.083	0.0244	0.000684	-3.4	-0.102	0.0254	6.03e-05	-4.01
-0.116	0.0209	0.0146	3.22e-08	-5.53	-0.0981	0.0702	0.162	-1.4	-0.129	0.0327	8.09e-05	-3.94	-0.0773	0.0397	0.0512	-1.95	-0.146	0.0443	0.000956	-3.3
-0.0989	0.0179	0.0146	3.23e-08	-5.53	-0.023	0.0762	0.762	-0.302	-0.103	0.0286	0.000333	-3.59	-0.117	0.0322	0.000291	-3.62	-0.0876	0.0361	0.0153	-2.42
0.061	0.011	0.0148	3.27e-08	5.53	0.127	0.0448	0.00471	2.83	0.0865	0.0172	4.73e-07	5.04	0.0258	0.0195	0.186	1.32	0.0453	0.0243	0.0626	1.86
0.0565	0.0102	0.0148	3.28e-08	5.53	0.0234	0.036	0.515	0.651	0.0737	0.0188	8.97e-05	3.92	0.054	0.0182	0.00299	2.97	0.0513	0.0185	0.00542	2.78
0.0572	0.0104	0.0148	3.28e-08	5.53	0.121	0.0476	0.0108	2.55	0.0517	0.0167	0.00196	3.1	0.0487	0.0182	0.0076	2.67	0.0648	0.0209	0.00194	3.1
-0.0715	0.0129	0.0149	3.3e-08	-5.52	-0.0704	0.0542	0.194	-1.3	-0.0781	0.0206	0.000153	-3.79	-0.0783	0.0226	0.00054	-3.46	-0.0501	0.0275	0.068	-1.82
0.0409	0.0074	0.0151	3.33e-08	5.52	0.102	0.0282	0.000281	3.63	0.0342	0.0125	0.00635	2.73	0.04	0.0134	0.00284	2.98	0.035	0.0141	0.0129	2.49
-0.0709	0.0128	0.0151	3.33e-08	-5.52	-0.0421	0.0529	0.426	-0.796	-0.079	0.0216	0.000252	-3.66	-0.0819	0.0232	0.000421	-3.53	-0.0548	0.0242	0.0235	-2.27
-0.0514	0.00931	0.0152	3.35e-08	-5.52	-0.0404	0.0347	0.244	-1.16	-0.0325	0.015	0.0298	-2.17	-0.0659	0.0165	6.23e-05	-4	-0.0668	0.0197	0.000711	-3.39
-0.0466	0.00844	0.0152	3.36e-08	-5.52	-0.107	0.0321	0.000887	-3.32	-0.0418	0.0155	0.00709	-2.69	-0.0382	0.0141	0.00675	-2.71	-0.0474	0.016	0.003	-2.97
0.0694	0.0126	0.0153	3.37e-08	5.52	0.131	0.0484	0.007	2.7	0.0684	0.0198	0.000542	3.46	0.0451	0.0232	0.0524	1.94	0.0838	0.0259	0.0012	3.24
-0.0459	0.00833	0.0158	3.5e-08	-5.51	-0.0906	0.0307	0.00316	-2.95	-0.0426	0.0149	0.00423	-2.86	-0.05	0.0145	0.000541	-3.46	-0.0331	0.0157	0.0348	-2.11
0.0406	0.00737	0.0159	3.51e-08	5.51	0.0921	0.0358	0.0102	2.57	0.0391	0.0129	0.00243	3.03	0.0297	0.012	0.0133	2.48	0.0503	0.0146	0.000583	3.44
-0.0466	0.00845	0.0161	3.56e-08	-5.51	-0.0299	0.0302	0.323	-0.988	-0.0312	0.0129	0.0157	-2.42	-0.0706	0.016	1.02e-05	-4.41	-0.0525	0.0183	0.00422	-2.86
0.0407	0.00739	0.0166	3.66e-08	5.51	0.00205	0.029	0.944	0.0708	0.0535	0.0119	6.82e-06	4.5	0.0395	0.0131	0.00247	3.03	0.0316	0.0154	0.0403	2.05
0.0461	0.00838	0.0167	3.69e-08	5.5	0.0655	0.0364	0.0724	1.8	0.0546	0.0144	0.000142	3.8	0.0459	0.0151	0.00244	3.03	0.0333	0.0153	0.0292	2.18
-0.0591	0.0107	0.0167	3.7e-08	-5.5	-0.056	0.0429	0.192	-1.31	-0.0426	0.0164	0.0095	-2.59	-0.0603	0.02	0.00252	-3.02	-0.0904	0.0228	7.65e-05	-3.96
0.0455	0.00826	0.0168	3.72e-08	5.5	0.0977	0.0315	0.00191	3.1	0.0399	0.0151	0.00833	2.64	0.0349	0.0142	0.0141	2.45	0.0511	0.0152	0.000793	3.36
0.0667	0.0121	0.0168	3.72e-08	5.5	0.133	0.0446	0.00292	2.98	0.0848	0.0192	1.02e-05	4.41	0.0285	0.0232	0.22	1.23	0.0603	0.024	0.012	2.51
-0.0486	0.00883	0.0169	3.74e-08	-5.5	-0.0677	0.0343	0.0484	-1.97	-0.0417	0.0135	0.00206	-3.08	-0.0566	0.0157	0.000305	-3.61	-0.0441	0.0203	0.0296	-2.17
-0.0502	0.00912	0.0171	3.79e-08	-5.5	-0.153	0.0348	1.14e-05	-4.39	-0.0455	0.0154	0.0031	-2.96	-0.0298	0.0151	0.0486	-1.97	-0.0597	0.0197	0.00242	-3.03
0.0439	0.00799	0.0174	3.85e-08	5.5	0.119	0.0304	8.38e-05	3.93	0.0544	0.0138	8.35e-05	3.93	0.0268	0.014	0.0547	1.92	0.0323	0.0154	0.0358	2.1
-0.0554	0.0101	0.0176	3.89e-08	-5.5	-0.0649	0.0367	0.0773	-1.77	-0.055	0.0177	0.00188	-3.11	-0.0605	0.0179	0.000742	-3.37	-0.0479	0.019	0.0118	-2.52
-0.0694	0.0126	0.0178	3.94e-08	-5.49	-0.104	0.0435	0.0166	-2.4	-0.0804	0.0224	0.000326	-3.59	-0.0435	0.0227	0.0551	-1.92	-0.0752	0.0237	0.00149	-3.18
0.0771	0.014	0.018	3.97e-08	5.49	0.161	0.0531	0.00239	3.04	0.0873	0.0212	3.72e-05	4.12	0.0552	0.027	0.0407	2.05	0.0569	0.03	0.0578	1.9
-0.0722	0.0131	0.0181	3.99e-08	-5.49	-0.137	0.0517	0.00799	-2.65	-0.085	0.0207	3.99e-05	-4.11	-0.0518	0.0238	0.0295	-2.18	-0.0582	0.0276	0.0349	-2.11
0.0657	0.012	0.0182	4.02e-08	5.49	0.136	0.0553	0.0136	2.47	0.0515	0.0176	0.00349	2.92	0.0553	0.0231	0.0166	2.4	0.0929	0.0254	0.000247	3.66
0.0456	0.0083	0.0183	4.05e-08	5.49	0.0558	0.0273	0.0412	2.04	0.0487	0.016	0.00228	3.05	0.0525	0.0154	0.00064	3.41	0.0345	0.0141	0.0144	2.45
-0.0692	0.0126	0.0188	4.15e-08	-5.48	-0.0497	0.0473	0.294	-1.05	-0.076	0.0198	0.000127	-3.83	-0.0769	0.0235	0.00109	-3.27	-0.0542	0.026	0.0371	-2.08
-0.0591	0.0108	0.0188	4.15e-08	-5.48	-0.0388	0.0441	0.379	-0.879	-0.0641	0.0174	0.000237	-3.68	-0.0521	0.018	0.00387	-2.89	-0.0681	0.024	0.0046	-2.83
0.0497	0.00907	0.019	4.21e-08	5.48	0.117	0.0385	0.00234	3.04	0.0553	0.0133	3.37e-05	4.15	0.0389	0.0166	0.0189	2.35	0.0329	0.0213	0.123	1.54
-0.0498	0.00909	0.0194	4.28e-08	-5.48	-0.0756	0.0351	0.031	-2.16	-0.0288	0.017	0.0904	-1.69	-0.0552	0.015	0.000244	-3.67	-0.0579	0.0171	0.000711	-3.39
-0.0739	0.0135	0.0196	4.33e-08	-5.48	-0.0658	0.0487	0.176	-1.35	-0.0471	0.0203	0.0203	-2.32	-0.103	0.0272	0.000155	-3.78	-0.0967	0.0279	0.000517	-3.47
-0.0446	0.00814	0.0196	4.34e-08	-5.48	-0.0572	0.0308	0.0634	-1.86	-0.0452	0.0136	0.000925	-3.31	-0.0514	0.0141	0.000267	-3.65	-0.0306	0.0166	0.0652	-1.84
0.0451	0.00823	0.0197	4.36e-08	5.48	0.0874	0.0297	0.00329	2.94	0.0574	0.0154	0.000202	3.72	0.0271	0.0152	0.0747	1.78	0.0407	0.014	0.00353	2.92
-0.0765	0.014	0.0197	4.36e-08	-5.48	-0.0802	0.0624	0.199	-1.29	-0.0828	0.0202	4.22e-05	-4.1	-0.1	0.0274	0.000261	-3.65	-0.0327	0.0302	0.279	-1.08
0.0735	0.0134	0.0199	4.39e-08	5.47	0.0601	0.0415	0.148	1.45	0.0998	0.0274	0.000266	3.65	0.0785	0.023	0.000655	3.41	0.0525	0.0239	0.0281	2.2
0.0388	0.00708	0.0199	4.39e-08	5.47	0.0831	0.0247	0.000759	3.37	0.0294	0.013	0.0238	2.26	0.0314	0.0128	0.0145	2.45	0.0431	0.0126	0.000618	3.42
-0.0695	0.0127	0.02	4.43e-08	-5.47	-0.0336	0.0454	0.459	-0.741	-0.0755	0.0229	0.000998	-3.29	-0.0643	0.0213	0.00255	-3.02	-0.0804	0.0249	0.00125	-3.23
0.0484	0.00884	0.0201	4.45e-08	5.47	0.00912	0.0312	0.77	0.292	0.0672	0.015	7.51e-06	4.48	0.0328	0.0163	0.0447	2.01	0.0526	0.0167	0.00165	3.15
-0.0689	0.0126	0.0202	4.46e-08	-5.47	-0.0704	0.0496	0.155	-1.42	-0.0857	0.0214	6.05e-05	-4.01	-0.0717	0.0217	0.000947	-3.31	-0.0415	0.0251	0.0988	-1.65
-0.07	0.0128	0.0205	4.53e-08	-5.47	-0.111	0.0556	0.046	-2	-0.0629	0.0182	0.000542	-3.46	-0.0751	0.0255	0.00327	-2.94	-0.0704	0.0286	0.0139	-2.46
-0.0598	0.011	0.0211	4.67e-08	-5.46	-0.0752	0.0441	0.088	-1.71	-0.0567	0.0176	0.0013	-3.22	-0.05	0.0198	0.0115	-2.53	-0.0731	0.0221	0.000924	-3.31
0.0643	0.0118	0.0213	4.7e-08	5.46	0.0759	0.0375	0.0426	2.03	0.0913	0.0234	9.38e-05	3.91	0.0402	0.0213	0.0593	1.89	0.0624	0.0201	0.00192	3.1
0.0572	0.0105	0.0214	4.72e-08	5.46	0.0315	0.0389	0.418	0.809	0.0813	0.0189	1.64e-05	4.31	0.045	0.0182	0.0135	2.47	0.0519	0.0195	0.00772	2.66
0.0529	0.00969	0.0216	4.77e-08	5.46	0.0544	0.028	0.0521	1.94	0.0807	0.0189	2.04e-05	4.26	0.0386	0.0178	0.0306	2.16	0.043	0.0171	0.0117	2.52
-0.0734	0.0134	0.0217	4.8e-08	-5.46	-0.094	0.0465	0.0433	-2.02	-0.0453	0.0228	0.0472	-1.98	-0.0777	0.0243	0.00142	-3.19	-0.0987	0.0261	0.000157	-3.78
-0.0523	0.00958	0.0218	4.82e-08	-5.46	-0.0711	0.0378	0.06	-1.88	-0.048	0.0151	0.0015	-3.18	-0.0565	0.018	0.00171	-3.14	-0.0497	0.0192	0.00948	-2.59
-0.0339	0.0062	0.0219	4.83e-08	-5.46	-0.0159	0.0229	0.487	-0.695	-0.0389	0.0106	0.000227	-3.69	-0.0388	0.0114	0.000672	-3.4	-0.0272	0.0116	0.019	-2.35
0.0711	0.013	0.0221	4.88e-08	5.46	0.134	0.0469	0.00439	2.85	0.0865	0.0213	4.87e-05	4.06	0.0658	0.0239	0.00591	2.75	0.0352	0.026	0.175	1.35
-0.066	0.0121	0.0221	4.89e-08	-5.46	-0.17	0.0444	0.000122	-3.84	-0.0654	0.0184	0.00037	-3.56	-0.0568	0.0241	0.0182	-2.36	-0.0443	0.0248	0.0736	-1.79
0.0755	0.0138	0.0222	4.9e-08	5.45	0.071	0.0497	0.153	1.43	0.0832	0.0206	5.57e-05	4.03	0.0856	0.0275	0.00186	3.11	0.0497	0.0295	0.0924	1.68
0.0461	0.00845	0.0223	4.93e-08	5.45	0.029	0.0248	0.242	1.17	0.0408	0.0179	0.0229	2.27	0.0453	0.0146	0.00198	3.09	0.0564	0.0147	0.000127	3.83
-0.0324	0.00595	0.0223	4.93e-08	-5.45	-0.0135	0.0222	0.542	-0.609	-0.0223	0.0105	0.0346	-2.11	-0.0304	0.0095	0.00135	-3.2	-0.057	0.0127	7.56e-06	-4.48
-0.0397	0.00728	0.0223	4.94e-08	-5.45	-0.0387	0.0257	0.132	-1.5	-0.048	0.0118	4.67e-05	-4.07	-0.04	0.0128	0.00182	-3.12	-0.0251	0.0157	0.111	-1.59
-0.08	0.0147	0.0225	4.97e-08	-5.45	-0.0796	0.0428	0.0629	-1.86	-0.0845	0.0289	0.00347	-2.92	-0.0658	0.025	0.00837	-2.64	-0.0935	0.0277	0.000751	-3.37
-0.0474	0.00869	0.0225	4.98e-08	-5.45	-0.03	0.0272	0.27	-1.1	-0.0369	0.0137	0.00718	-2.69	-0.0518	0.0157	0.000983	-3.3	-0.0717	0.0199	0.000313	-3.6
-0.0497	0.00911	0.0227	5.01e-08	-5.45	-0.0681	0.0358	0.0572	-1.9	-0.0388	0.0151	0.0101	-2.57	-0.0495	0.0173	0.00417	-2.87	-0.0595	0.0169	0.000429	-3.52
-0.0756	0.0139	0.0231	5.1e-08	-5.45	-0.0735	0.0462	0.112	-1.59	-0.0463	0.0223	0.0377	-2.08	-0.0736	0.0259	0.00444	-2.84	-0.127	0.0287	9.03e-06	-4.44
0.074	0.0136	0.0231	5.1e-08	5.45	0.0661	0.0512	0.196	1.29	0.0827	0.0217	0.000135	3.82	0.0489	0.0247	0.0479	1.98	0.0939	0.028	0.000794	3.35
0.059	0.0108	0.0231	5.11e-08	5.45	0.0805	0.0422	0.0563	1.91	0.0611	0.0179	0.000658	3.41	0.037	0.0196	0.0586	1.89	0.0765	0.0212	0.000301	3.61
0.0584	0.0107	0.0236	5.22e-08	5.44	0.103	0.0405	0.0109	2.55	0.0501	0.0179	0.00517	2.8	0.0588	0.0196	0.00275	2.99	0.0574	0.0206	0.00521	2.79
0.0427	0.00784	0.0239	5.28e-08	5.44	0.0545	0.0344	0.113	1.59	0.0448	0.0106	2.37e-05	4.23	0.0159	0.0183	0.383	0.872	0.057	0.0168	0.000696	3.39
-0.0927	0.017	0.0241	5.32e-08	-5.44	-0.12	0.0648	0.0638	-1.85	-0.0791	0.0278	0.00445	-2.84	-0.0897	0.0327	0.00603	-2.75	-0.107	0.032	0.00084	-3.34
0.0377	0.00692	0.0242	5.34e-08	5.44	0.0618	0.0262	0.0183	2.36	0.0469	0.0124	0.000154	3.79	0.0239	0.0117	0.0411	2.04	0.0387	0.0134	0.00389	2.89
-0.035	0.00644	0.0243	5.38e-08	-5.44	-0.07	0.0217	0.00127	-3.22	-0.065	0.0112	5.93e-09	-5.82	-0.00954	0.011	0.388	-0.863	-0.0168	0.0132	0.204	-1.27
-0.041	0.00754	0.0243	5.38e-08	-5.44	-0.0369	0.0257	0.151	-1.44	-0.0431	0.0131	0.00101	-3.29	-0.0454	0.013	0.000498	-3.48	-0.0336	0.0151	0.0258	-2.23
0.0546	0.01	0.0246	5.42e-08	5.44	0.135	0.0454	0.00295	2.97	0.0414	0.015	0.00571	2.76	0.044	0.0178	0.0133	2.48	0.0843	0.0235	0.000343	3.58
0.0585	0.0108	0.0247	5.45e-08	5.44	0.0365	0.0276	0.186	1.32	0.0958	0.0214	7.18e-06	4.49	0.0634	0.0192	0.000964	3.3	0.0311	0.0204	0.127	1.53
0.0519	0.00956	0.0255	5.63e-08	5.43	0.0658	0.035	0.0599	1.88	0.0558	0.0155	0.00033	3.59	0.0657	0.0178	0.00023	3.68	0.027	0.0188	0.151	1.43
0.0359	0.00662	0.0265	5.85e-08	5.42	0.0112	0.0277	0.685	0.405	0.0438	0.0106	3.28e-05	4.15	0.017	0.0122	0.166	1.39	0.0509	0.0131	0.0001	3.89
-0.063	0.0116	0.0266	5.87e-08	-5.42	-0.0704	0.0379	0.0629	-1.86	-0.0549	0.0194	0.00471	-2.83	-0.0699	0.0212	0.000974	-3.3	-0.0635	0.0233	0.00652	-2.72
-0.0518	0.00955	0.0269	5.93e-08	-5.42	-0.00168	0.0338	0.96	-0.0498	-0.0448	0.0163	0.00581	-2.76	-0.0393	0.018	0.0289	-2.18	-0.0857	0.0177	1.22e-06	-4.85
0.0423	0.0078	0.0269	5.95e-08	5.42	0.0316	0.0247	0.201	1.28	0.0776	0.0141	3.88e-08	5.5	0.0332	0.0136	0.0144	2.45	0.0169	0.0152	0.266	1.11
-0.058	0.0107	0.027	5.98e-08	-5.42	-0.019	0.0439	0.666	-0.432	-0.0506	0.0171	0.00314	-2.95	-0.0681	0.0189	0.000304	-3.61	-0.0666	0.0224	0.00296	-2.97
0.0414	0.00764	0.0271	5.99e-08	5.42	0.0856	0.027	0.00153	3.17	0.0506	0.0134	0.000166	3.77	0.0197	0.0131	0.133	1.5	0.0446	0.015	0.00303	2.97
-0.0295	0.00545	0.0277	6.11e-08	-5.42	-0.0353	0.019	0.0641	-1.85	-0.033	0.00999	0.000952	-3.3	-0.0268	0.00919	0.00354	-2.92	-0.0275	0.0105	0.00905	-2.61
-0.0841	0.0155	0.0277	6.13e-08	-5.42	-0.16	0.0652	0.0141	-2.45	-0.0885	0.0241	0.000243	-3.67	-0.0643	0.0278	0.0205	-2.32	-0.0842	0.0334	0.0116	-2.52
-0.0639	0.0118	0.0278	6.15e-08	-5.41	-0.0527	0.0417	0.206	-1.27	-0.0375	0.0197	0.057	-1.9	-0.0986	0.021	2.71e-06	-4.69	-0.0616	0.0238	0.00971	-2.59
0.135	0.0249	0.0279	6.17e-08	5.41	0.185	0.0872	0.0341	2.12	0.184	0.0422	1.35e-05	4.35	0.114	0.047	0.0154	2.42	0.0824	0.0464	0.076	1.77
-0.0576	0.0106	0.028	6.18e-08	-5.41	-0.0464	0.0404	0.251	-1.15	-0.061	0.0172	0.000383	-3.55	-0.0674	0.0192	0.000437	-3.52	-0.0427	0.0217	0.0498	-1.96
-0.092	0.017	0.028	6.19e-08	-5.41	-0.0381	0.0546	0.485	-0.698	-0.116	0.0298	0.000104	-3.88	-0.0807	0.0325	0.0131	-2.48	-0.0941	0.0308	0.00225	-3.06
-0.0576	0.0106	0.0281	6.21e-08	-5.41	-0.128	0.0406	0.00153	-3.17	-0.0828	0.0179	3.69e-06	-4.63	-0.0174	0.0196	0.375	-0.888	-0.0508	0.0201	0.0114	-2.53
-0.0501	0.00926	0.0281	6.21e-08	-5.41	-0.118	0.0349	0.000717	-3.38	-0.0544	0.0155	0.000463	-3.5	-0.0349	0.016	0.029	-2.18	-0.0453	0.019	0.0172	-2.38
0.0321	0.00593	0.0287	6.35e-08	5.41	0.0473	0.0232	0.0418	2.04	0.0194	0.00905	0.0321	2.14	0.0476	0.0105	5.51e-06	4.54	0.0294	0.0139	0.0341	2.12
0.0581	0.0107	0.0288	6.36e-08	5.41	0.114	0.0439	0.0096	2.59	0.0649	0.0178	0.00026	3.65	0.0374	0.0181	0.0389	2.07	0.0645	0.0227	0.00451	2.84
-0.0621	0.0115	0.0288	6.37e-08	-5.41	-0.0878	0.0351	0.0122	-2.51	-0.0451	0.0197	0.0219	-2.29	-0.0628	0.021	0.00273	-3	-0.0736	0.023	0.00135	-3.21
-0.0485	0.00897	0.0289	6.39e-08	-5.41	-0.045	0.0304	0.139	-1.48	-0.0425	0.0146	0.00369	-2.9	-0.069	0.0166	3.13e-05	-4.16	-0.0344	0.0182	0.058	-1.9
-0.0319	0.0059	0.0291	6.43e-08	-5.41	-0.0329	0.0244	0.177	-1.35	-0.0287	0.00909	0.00157	-3.16	-0.0268	0.0111	0.0161	-2.41	-0.0434	0.0121	0.000337	-3.59
-0.0829	0.0153	0.0294	6.5e-08	-5.4	-0.0399	0.0607	0.511	-0.657	-0.0645	0.0246	0.00885	-2.62	-0.0897	0.0283	0.00151	-3.17	-0.114	0.0305	0.000179	-3.75
0.0474	0.00877	0.0297	6.55e-08	5.4	0.0405	0.0284	0.153	1.43	0.0607	0.0143	2.19e-05	4.24	0.035	0.0163	0.0324	2.14	0.0441	0.0179	0.0135	2.47
-0.0523	0.00968	0.0297	6.56e-08	-5.4	-0.121	0.0376	0.00124	-3.23	-0.0434	0.0154	0.00485	-2.82	-0.039	0.0191	0.0408	-2.05	-0.0605	0.0182	0.000895	-3.32
-0.0336	0.00622	0.03	6.64e-08	-5.4	-0.0792	0.0243	0.00114	-3.25	-0.0303	0.01	0.00249	-3.02	-0.0146	0.0106	0.168	-1.38	-0.0575	0.0138	3.09e-05	-4.17
-0.0302	0.0056	0.0301	6.66e-08	-5.4	-0.0384	0.0249	0.123	-1.54	-0.0308	0.00834	0.000218	-3.7	-0.0153	0.0106	0.15	-1.44	-0.0457	0.0119	0.000118	-3.85
-0.0617	0.0114	0.0303	6.69e-08	-5.4	-0.103	0.0391	0.00858	-2.63	-0.0745	0.019	9.19e-05	-3.91	-0.044	0.0203	0.03	-2.17	-0.0513	0.0235	0.0293	-2.18
-0.0502	0.0093	0.0304	6.72e-08	-5.4	-0.033	0.0356	0.354	-0.927	-0.04	0.0139	0.00395	-2.88	-0.06	0.0184	0.0011	-3.26	-0.0648	0.0196	0.000942	-3.31
-0.0812	0.0151	0.0313	6.91e-08	-5.39	-0.109	0.063	0.0835	-1.73	-0.0818	0.0236	0.000525	-3.47	-0.0414	0.0273	0.13	-1.51	-0.126	0.0313	5.94e-05	-4.01
-0.0615	0.0114	0.0313	6.91e-08	-5.39	-0.0532	0.0482	0.27	-1.1	-0.0619	0.022	0.00495	-2.81	-0.0671	0.0186	0.000299	-3.62	-0.0555	0.0208	0.00772	-2.66
-0.0661	0.0123	0.0314	6.93e-08	-5.39	-0.133	0.0443	0.00257	-3.01	-0.0758	0.0216	0.000462	-3.5	-0.0279	0.0222	0.208	-1.26	-0.0776	0.0225	0.000564	-3.45
0.0526	0.00976	0.0317	7e-08	5.39	0.0397	0.0326	0.224	1.22	0.0582	0.0157	0.000219	3.7	0.0462	0.0189	0.0144	2.45	0.0554	0.0192	0.00385	2.89
-0.0305	0.00567	0.0318	7.03e-08	-5.39	-0.0353	0.0228	0.122	-1.55	-0.0419	0.0101	3.55e-05	-4.13	-0.0201	0.0102	0.0494	-1.96	-0.0286	0.01	0.00446	-2.84
-0.0564	0.0105	0.0319	7.04e-08	-5.39	-0.0894	0.0306	0.0035	-2.92	-0.0654	0.0201	0.00112	-3.26	-0.0579	0.018	0.00133	-3.21	-0.0316	0.02	0.114	-1.58
0.0512	0.0095	0.0322	7.11e-08	5.39	0.0474	0.0339	0.162	1.4	0.052	0.0146	0.000379	3.55	0.0586	0.0178	0.000994	3.29	0.0411	0.0205	0.0446	2.01
-0.0933	0.0173	0.0324	7.15e-08	-5.39	-0.148	0.0659	0.0247	-2.25	-0.103	0.0265	9.43e-05	-3.9	-0.0495	0.033	0.134	-1.5	-0.111	0.0364	0.00226	-3.05
-0.0518	0.00962	0.0325	7.18e-08	-5.39	-0.0759	0.0342	0.0264	-2.22	-0.0692	0.0183	0.000154	-3.78	-0.0317	0.0162	0.0504	-1.96	-0.0531	0.0178	0.00286	-2.98
0.0474	0.00881	0.033	7.29e-08	5.38	0.0657	0.0284	0.0207	2.31	0.0679	0.0184	0.000223	3.69	0.042	0.0164	0.0103	2.57	0.0347	0.0142	0.0144	2.45
0.0837	0.0156	0.0333	7.35e-08	5.38	0.135	0.0538	0.0121	2.51	0.133	0.0257	2.11e-07	5.19	0.0375	0.0279	0.18	1.34	0.0498	0.0317	0.116	1.57
0.0576	0.0107	0.0335	7.4e-08	5.38	0.0789	0.0357	0.0269	2.21	0.0673	0.022	0.0022	3.06	0.0497	0.0194	0.0105	2.56	0.0527	0.0176	0.00279	2.99
0.0289	0.00538	0.0336	7.42e-08	5.38	0.0548	0.0231	0.0178	2.37	0.0284	0.00905	0.00169	3.14	0.0215	0.00901	0.0172	2.38	0.035	0.011	0.00153	3.17
-0.0651	0.0121	0.0337	7.44e-08	-5.38	-0.0651	0.0411	0.113	-1.58	-0.0917	0.0198	3.64e-06	-4.63	-0.0602	0.0217	0.00554	-2.77	-0.0284	0.0252	0.261	-1.12
0.0489	0.00909	0.0338	7.48e-08	5.38	0.12	0.0344	0.00046	3.5	0.0493	0.0162	0.00231	3.05	0.0273	0.0163	0.0943	1.67	0.054	0.0165	0.00104	3.28
-0.0494	0.00919	0.034	7.52e-08	-5.38	-0.0126	0.0326	0.7	-0.386	-0.0775	0.0167	3.61e-06	-4.63	-0.0347	0.016	0.0297	-2.17	-0.0471	0.0171	0.00597	-2.75
-0.0485	0.00902	0.0342	7.55e-08	-5.38	-0.0268	0.0369	0.467	-0.727	-0.0556	0.0146	0.000144	-3.8	-0.0459	0.0169	0.00654	-2.72	-0.0462	0.0173	0.00744	-2.68
-0.0385	0.00717	0.0343	7.58e-08	-5.38	-0.0294	0.0244	0.23	-1.2	-0.0488	0.0124	8.1e-05	-3.94	-0.0261	0.0135	0.0538	-1.93	-0.0415	0.0132	0.00162	-3.15
-0.0734	0.0136	0.0345	7.63e-08	-5.38	-0.0673	0.0455	0.139	-1.48	-0.052	0.0216	0.0162	-2.41	-0.0926	0.0245	0.000161	-3.77	-0.0887	0.0303	0.00346	-2.92
0.0339	0.00631	0.0348	7.7e-08	5.37	0.0104	0.021	0.623	0.492	0.0415	0.0127	0.00105	3.28	0.0214	0.0116	0.0648	1.85	0.0448	0.0105	1.82e-05	4.29
-0.0403	0.0075	0.0349	7.7e-08	-5.37	-0.0101	0.0269	0.709	-0.373	-0.0182	0.0131	0.166	-1.39	-0.0543	0.0125	1.45e-05	-4.34	-0.0594	0.0154	0.000113	-3.86
-0.0425	0.00791	0.0353	7.81e-08	-5.37	-0.0479	0.0309	0.121	-1.55	-0.0315	0.0117	0.00724	-2.69	-0.0572	0.0155	0.000224	-3.69	-0.0461	0.0169	0.0063	-2.73
0.0593	0.011	0.0356	7.87e-08	5.37	0.107	0.0366	0.00361	2.91	0.0862	0.0196	1.11e-05	4.39	0.0487	0.0193	0.0118	2.52	0.0241	0.0214	0.259	1.13
-0.0533	0.00993	0.0358	7.9e-08	-5.37	-0.123	0.0456	0.00673	-2.71	-0.0644	0.015	1.7e-05	-4.3	-0.0276	0.0186	0.137	-1.49	-0.0494	0.0208	0.0175	-2.38
-0.0445	0.0083	0.037	8.18e-08	-5.36	-0.0406	0.0303	0.179	-1.34	-0.0587	0.0142	3.36e-05	-4.15	-0.0414	0.0153	0.00682	-2.71	-0.0317	0.0155	0.0408	-2.05
0.0849	0.0158	0.0371	8.19e-08	5.36	0.202	0.055	0.000238	3.67	0.102	0.0262	9.3e-05	3.91	0.032	0.028	0.254	1.14	0.0883	0.0328	0.0071	2.69
-0.0449	0.00838	0.0372	8.21e-08	-5.36	-0.0582	0.0288	0.0435	-2.02	-0.027	0.0128	0.0345	-2.11	-0.0564	0.0168	0.000755	-3.37	-0.0604	0.0172	0.000452	-3.51
0.0432	0.00805	0.0373	8.24e-08	5.36	0.000533	0.0299	0.986	0.0178	0.0492	0.0134	0.000242	3.67	0.0415	0.0149	0.00549	2.78	0.0484	0.0154	0.00164	3.15
0.0636	0.0119	0.0375	8.29e-08	5.36	0.102	0.0485	0.0356	2.1	0.0717	0.0183	8.87e-05	3.92	0.0288	0.0212	0.175	1.36	0.0887	0.0261	0.000677	3.4
-0.027	0.00503	0.0379	8.37e-08	-5.36	-0.0226	0.0177	0.203	-1.27	-0.0218	0.00802	0.00661	-2.72	-0.0246	0.00944	0.0092	-2.6	-0.0398	0.0103	0.000105	-3.88
-0.0429	0.008	0.0381	8.41e-08	-5.36	-0.0721	0.0292	0.0134	-2.47	-0.0366	0.0136	0.00724	-2.69	-0.0311	0.0135	0.0214	-2.3	-0.0605	0.0167	0.000281	-3.63
0.047	0.00878	0.0381	8.41e-08	5.36	0.0582	0.0343	0.0901	1.69	0.0438	0.0147	0.00283	2.99	0.0529	0.0159	0.00087	3.33	0.042	0.0168	0.0126	2.49
0.0584	0.0109	0.0381	8.43e-08	5.36	0.109	0.0392	0.00542	2.78	0.075	0.0203	0.000224	3.69	0.0452	0.0191	0.0181	2.36	0.0441	0.0195	0.0238	2.26
-0.0606	0.0113	0.0383	8.46e-08	-5.36	-0.2	0.074	0.00684	-2.7	-0.066	0.0139	2.06e-06	-4.75	-0.0323	0.0252	0.201	-1.28	-0.0509	0.0339	0.133	-1.5
0.0419	0.00782	0.0384	8.48e-08	5.36	0.0333	0.026	0.2	1.28	0.0476	0.0129	0.000228	3.69	0.037	0.0144	0.0101	2.57	0.0424	0.0157	0.007	2.7
-0.066	0.0123	0.0389	8.6e-08	-5.35	-0.069	0.0449	0.125	-1.54	-0.068	0.0192	0.0004	-3.54	-0.0677	0.0227	0.00285	-2.98	-0.0588	0.0264	0.0258	-2.23
0.0982	0.0183	0.0391	8.65e-08	5.35	0.117	0.0634	0.0655	1.84	0.0855	0.0294	0.00364	2.91	0.0969	0.0346	0.00517	2.8	0.113	0.0369	0.00213	3.07
-0.0569	0.0106	0.0393	8.68e-08	-5.35	-0.0794	0.0395	0.0442	-2.01	-0.0393	0.0182	0.0305	-2.16	-0.0636	0.0178	0.000352	-3.57	-0.0657	0.0223	0.00317	-2.95
-0.068	0.0127	0.0401	8.87e-08	-5.35	-0.0676	0.035	0.0533	-1.93	-0.0735	0.0252	0.00356	-2.91	-0.074	0.0223	0.000919	-3.31	-0.0567	0.0237	0.0166	-2.4
0.0351	0.00656	0.0404	8.93e-08	5.35	0.0293	0.0241	0.224	1.22	0.0316	0.0101	0.0017	3.14	0.0335	0.0122	0.00601	2.75	0.0463	0.0143	0.00117	3.25
0.0335	0.00627	0.0405	8.95e-08	5.35	0.0564	0.0223	0.0113	2.53	0.0253	0.0117	0.0306	2.16	0.03	0.0111	0.00669	2.71	0.039	0.0113	0.000522	3.47
-0.0731	0.0137	0.041	9.05e-08	-5.34	-0.168	0.063	0.00772	-2.66	-0.0794	0.0207	0.000127	-3.83	-0.0398	0.0252	0.114	-1.58	-0.0846	0.0289	0.00346	-2.92
0.0353	0.00661	0.041	9.06e-08	5.34	0.0138	0.025	0.58	0.553	0.0254	0.0105	0.0156	2.42	0.0419	0.0123	0.000663	3.4	0.0495	0.0133	0.000194	3.73
0.0359	0.00671	0.0415	9.16e-08	5.34	0.0591	0.0288	0.0398	2.06	0.0354	0.0113	0.00181	3.12	0.0253	0.0115	0.028	2.2	0.0456	0.0133	0.000599	3.43
-0.0675	0.0126	0.0416	9.19e-08	-5.34	-0.0614	0.0659	0.352	-0.931	-0.0439	0.0184	0.0167	-2.39	-0.0973	0.023	2.39e-05	-4.22	-0.0804	0.0291	0.00574	-2.76
0.0506	0.00948	0.0418	9.24e-08	5.34	0.124	0.0314	8.33e-05	3.93	0.0484	0.0188	0.0101	2.57	0.0439	0.0165	0.00772	2.66	0.0388	0.0167	0.0199	2.33
-0.0501	0.00939	0.0419	9.26e-08	-5.34	-0.0119	0.0312	0.703	-0.381	-0.0508	0.0157	0.00118	-3.24	-0.0533	0.0158	0.000764	-3.37	-0.0609	0.0211	0.00388	-2.89
0.0283	0.00529	0.0421	9.31e-08	5.34	0.0147	0.0192	0.444	0.766	0.0323	0.00849	0.00014	3.81	0.0286	0.0101	0.0045	2.84	0.0258	0.0104	0.0132	2.48
0.0644	0.0121	0.0422	9.32e-08	5.34	0.0344	0.0474	0.468	0.726	0.0577	0.0194	0.00288	2.98	0.0794	0.0227	0.000457	3.5	0.0655	0.0235	0.00528	2.79
0.0474	0.00888	0.0422	9.32e-08	5.34	0.119	0.0304	9.69e-05	3.9	0.0398	0.0169	0.0183	2.36	0.0283	0.0157	0.0716	1.8	0.0542	0.0157	0.000578	3.44
0.0469	0.00878	0.0427	9.43e-08	5.34	0.0451	0.0332	0.174	1.36	0.0546	0.0164	0.000835	3.34	0.029	0.0161	0.0721	1.8	0.0561	0.0149	0.000174	3.75
-0.0528	0.0099	0.0427	9.44e-08	-5.34	-0.012	0.0402	0.766	-0.298	-0.0545	0.0158	0.000579	-3.44	-0.0645	0.0182	0.000391	-3.55	-0.0464	0.0197	0.0185	-2.35
-0.0599	0.0112	0.0427	9.44e-08	-5.34	-0.161	0.0411	8.97e-05	-3.92	-0.0575	0.0178	0.00121	-3.24	-0.0219	0.0208	0.293	-1.05	-0.0788	0.0231	0.000652	-3.41
-0.0491	0.0092	0.0429	9.48e-08	-5.34	-0.0773	0.0355	0.0295	-2.18	-0.0581	0.0154	0.000159	-3.78	-0.048	0.0169	0.00456	-2.84	-0.032	0.0174	0.0658	-1.84
-0.0436	0.00817	0.043	9.5e-08	-5.34	-0.0836	0.0299	0.00526	-2.79	-0.0396	0.0137	0.00377	-2.9	-0.0297	0.0143	0.0385	-2.07	-0.0555	0.0165	0.000757	-3.37
0.0508	0.00951	0.0431	9.53e-08	5.34	0.0316	0.0322	0.325	0.984	0.0709	0.0168	2.57e-05	4.21	0.0326	0.0164	0.047	1.99	0.0561	0.0188	0.0028	2.99
-0.0377	0.00708	0.0435	9.62e-08	-5.33	-0.061	0.0231	0.00829	-2.64	-0.039	0.0115	0.000725	-3.38	-0.0384	0.0134	0.00421	-2.86	-0.0265	0.0141	0.0604	-1.88
-0.0787	0.0148	0.0436	9.64e-08	-5.33	-0.0655	0.0534	0.22	-1.23	-0.0946	0.0242	9.22e-05	-3.91	-0.0975	0.0265	0.000237	-3.68	-0.0344	0.0299	0.25	-1.15
0.0829	0.0155	0.0438	9.68e-08	5.33	0.0464	0.0488	0.341	0.952	0.117	0.0263	9.52e-06	4.43	0.0913	0.0296	0.00202	3.09	0.045	0.0297	0.129	1.52
-0.0233	0.00438	0.0439	9.7e-08	-5.33	-0.00398	0.0151	0.792	-0.264	-0.0283	0.00725	9.25e-05	-3.91	-0.0239	0.00758	0.00161	-3.15	-0.0216	0.00939	0.0214	-2.3
-0.0782	0.0147	0.0441	9.74e-08	-5.33	-0.0695	0.0574	0.226	-1.21	-0.0693	0.0231	0.00275	-2.99	-0.0756	0.0267	0.00458	-2.83	-0.0999	0.0306	0.00111	-3.26
0.0419	0.00786	0.0442	9.76e-08	5.33	0.000759	0.0303	0.98	0.025	0.0625	0.0124	4.16e-07	5.06	0.0234	0.0144	0.104	1.63	0.0415	0.0164	0.0112	2.54
-0.088	0.0165	0.0443	9.78e-08	-5.33	-0.105	0.0635	0.0994	-1.65	-0.0878	0.026	0.000728	-3.38	-0.0946	0.0304	0.00188	-3.11	-0.0754	0.0342	0.0274	-2.21
0.047	0.00882	0.0444	9.81e-08	5.33	0.071	0.0268	0.00817	2.64	0.0479	0.018	0.00785	2.66	0.0457	0.0165	0.00559	2.77	0.0405	0.0146	0.00559	2.77
-0.071	0.0133	0.0445	9.83e-08	-5.33	-0.0979	0.0519	0.0594	-1.89	-0.0752	0.0221	0.000662	-3.4	-0.0661	0.0233	0.00463	-2.83	-0.064	0.0269	0.0174	-2.38
-0.0578	0.0109	0.0451	9.97e-08	-5.33	0.0013	0.0432	0.976	0.03	-0.0382	0.0182	0.0363	-2.09	-0.0842	0.0187	6.84e-06	-4.5	-0.0652	0.0219	0.00287	-2.98
-0.0743	0.0139	0.0453	1e-07	-5.33	-0.0417	0.049	0.394	-0.852	-0.0555	0.0229	0.0155	-2.42	-0.0975	0.0253	0.000114	-3.86	-0.0846	0.0282	0.00272	-3
-0.0415	0.00779	0.0455	1.01e-07	-5.33	-0.0571	0.0242	0.0184	-2.36	-0.0642	0.0132	1.21e-06	-4.85	-0.0198	0.0141	0.162	-1.4	-0.0297	0.0157	0.0588	-1.89
0.0536	0.0101	0.046	1.02e-07	5.32	0.0804	0.0306	0.00856	2.63	0.0781	0.019	3.87e-05	4.12	0.046	0.0181	0.011	2.54	0.0288	0.0183	0.116	1.57
-0.0275	0.00516	0.0462	1.02e-07	-5.32	-0.017	0.0186	0.36	-0.916	-0.0199	0.00926	0.0317	-2.15	-0.0275	0.00896	0.0022	-3.06	-0.0389	0.00977	6.8e-05	-3.98
0.0647	0.0122	0.0465	1.03e-07	5.32	0.0325	0.037	0.379	0.88	0.0977	0.0222	1.13e-05	4.39	0.0545	0.0215	0.0113	2.53	0.0533	0.0232	0.0216	2.3
-0.0631	0.0119	0.0467	1.03e-07	-5.32	-0.00126	0.0463	0.978	-0.0272	-0.0557	0.0189	0.00328	-2.94	-0.0815	0.0223	0.000256	-3.66	-0.0698	0.0233	0.0027	-3
-0.0649	0.0122	0.0467	1.03e-07	-5.32	-0.0584	0.0441	0.185	-1.32	-0.078	0.0192	4.8e-05	-4.07	-0.0204	0.0226	0.366	-0.903	-0.1	0.0255	8.12e-05	-3.94
-0.0979	0.0184	0.0468	1.03e-07	-5.32	-0.145	0.0609	0.0173	-2.38	-0.0669	0.0303	0.0274	-2.21	-0.11	0.0341	0.00121	-3.24	-0.112	0.0368	0.0024	-3.04
-0.0498	0.00936	0.0469	1.04e-07	-5.32	-0.0686	0.0338	0.0424	-2.03	-0.0224	0.0223	0.315	-1.01	-0.0519	0.013	6.98e-05	-3.98	-0.06	0.0195	0.00208	-3.08
-0.0525	0.00988	0.0476	1.05e-07	-5.32	0.0278	0.0325	0.393	0.855	-0.0651	0.0159	4.4e-05	-4.09	-0.0656	0.0177	0.000213	-3.7	-0.0456	0.0214	0.0335	-2.13
-0.0385	0.00724	0.0477	1.05e-07	-5.32	-0.106	0.0266	6.93e-05	-3.98	-0.0331	0.0119	0.00544	-2.78	-0.00726	0.0144	0.613	-0.505	-0.0549	0.0132	3.11e-05	-4.17
-0.0641	0.0121	0.0478	1.06e-07	-5.32	-0.0912	0.0441	0.0385	-2.07	-0.0772	0.0195	7.9e-05	-3.95	-0.0603	0.0217	0.00541	-2.78	-0.0394	0.0248	0.113	-1.59
-0.0956	0.018	0.048	1.06e-07	-5.32	-0.141	0.0522	0.00677	-2.71	-0.0884	0.0309	0.00422	-2.86	-0.0739	0.0345	0.0323	-2.14	-0.106	0.0345	0.00209	-3.08
-0.0562	0.0106	0.0484	1.07e-07	-5.31	-0.144	0.0411	0.000482	-3.49	-0.0597	0.0164	0.000263	-3.65	-0.0397	0.0202	0.0491	-1.97	-0.0449	0.0215	0.0364	-2.09
0.0966	0.0182	0.0486	1.07e-07	5.31	-0.00278	0.0663	0.967	-0.042	0.147	0.0293	5e-07	5.03	0.075	0.0354	0.0341	2.12	0.0737	0.0347	0.0336	2.12
-0.0508	0.00957	0.0489	1.08e-07	-5.31	-0.0654	0.0307	0.0331	-2.13	-0.0267	0.0167	0.109	-1.6	-0.0429	0.0172	0.0124	-2.5	-0.0854	0.0187	5.05e-06	-4.56
0.0349	0.00657	0.0491	1.08e-07	5.31	0.0558	0.0264	0.0346	2.11	0.0291	0.0104	0.00518	2.8	0.03	0.0121	0.0134	2.47	0.0449	0.0132	0.000702	3.39
-0.0704	0.0132	0.0491	1.09e-07	-5.31	-0.084	0.0508	0.0981	-1.65	-0.0596	0.0214	0.00527	-2.79	-0.0604	0.0237	0.0107	-2.55	-0.0974	0.0274	0.000372	-3.56
0.0512	0.00964	0.0494	1.09e-07	5.31	0.126	0.0336	0.000181	3.74	0.0568	0.0175	0.00117	3.25	0.0285	0.0167	0.087	1.71	0.0504	0.0183	0.0058	2.76
-0.042	0.00791	0.0499	1.1e-07	-5.31	-0.00931	0.0252	0.712	-0.369	-0.0388	0.0134	0.00379	-2.9	-0.0451	0.0144	0.00174	-3.13	-0.0555	0.0158	0.000437	-3.52
-0.0441	0.0083	0.0499	1.1e-07	-5.31	-0.0473	0.0309	0.126	-1.53	-0.0456	0.0154	0.003	-2.97	-0.0437	0.0149	0.00343	-2.93	-0.0423	0.0145	0.00355	-2.92
